# Supplementary material for: BADGER: evaluating the performance of ancient DNA genetic relatedness estimation methods using high-fidelity pedigree simulations
Source: Research Square preprint supplement (doi:10.21203/rs.3.rs-7045281/v1), 2025-09-08
Supplement: Supplementary file 1 [file 5a61b461be64e4e9bdfd8bbc.xlsx]

## Sheet: S1
# Supplementary Table S1: Denominator values used for the normalisation of RMSD and MBE estimates.
	Expected relatedness coefficient
	0	0.125	0.1875	0.25	0.3125	0.375	0.5	0.5625	0.625	0.75	1
outbred pedigree	0.0625	0.125	N/A	0.1875	N/A	N/A	0.375	N/A	N/A	N/A	0.25
inbred pedigree	N/A	0.09375	0.0625	0.0625	0.0625	0.09375	0.09375	0.0625	0.09375	0.1875	N/A

## Sheet: S2
# Supplementary Table S2: Description of the pairwise relationships contained within the input pedigrees used throughout this study.
# IndA-id (ped-sim): identifier of the first individual involved in the comparison (internal identifier of the ped-sim software is specified in parentheses)
# IndB-id (ped-sim): identifier of the second individual involved in the comparison (internal identifier of the ped-sim software is specified in parentheses)
# pedigree: In which pedigree is this comparison found ? (outbred: comparison is found in the default pedigree | inbred: comparison is only found in the alternative pedigree during inbreeding simulations)
# effective r-coefficient: expected relatedness coefficient of the considered comparison
# decomposed degree: degree of relationship of the considered comparison. May be composed of several ties for inbred individuals (e.g.: “1° + 3°” implies the pair share both a first- and a third-degree relationship)
# description: vernacular description(s) of the relationship(s)
IndA-id (ped-sim)	indB-id(ped-sim)	pedigree	effective r-coefficient	decomposed degree	description
I.1 (g1-b1-i1)	I.2 (g1-b2-i1)	outbred	0	U°	I.1 and I.2 are unrelated
I.1 (g1-b1-i1)	I.3 (g1-b3-i1)	outbred	0	U°	I.1 and I.3 are unrelated
I.1 (g1-b1-i1)	II.1 (G2-B1-S1)	outbred	0	U°	I.1 and II.1 are unrelated
I.1 (g1-b1-i1)	II.2 (g2-b1-s1)	outbred	0	U°	I.1 and II.2 are unrelated
I.1 (g1-b1-i1)	II.3 (g2-b1-i1)	outbred	0.5	1°	I.1 is the parent of II.3
I.1 (g1-b1-i1)	II.4 (g2-b2-i1)	outbred	0.5	1°	I.1 is the parent of II.4
I.1 (g1-b1-i1)	II.5 (g2-b2-s1)	outbred	0	U°	I.1 and II.5 are unrelated
I.1 (g1-b1-i1)	II.6 (g2-b3-i1)	outbred	0	U°	I.1 and II.6 are unrelated
I.1 (g1-b1-i1)	III.1 (g3-b1-i1)	outbred	0.25	2°	I.1 is the grandparent of III.1
I.1 (g1-b1-i1)	III.2 (g3-b2-i1)	outbred	0.25	2°	I.1 is the grandparent of III.2
I.1 (g1-b1-i1)	III.3 (g3-b3-i1)	inbred	0.5	2° + 2°	I.1 is a double grandparent of III.3
I.1 (g1-b1-i1)	III.4 (g3-b4-i1)	inbred	0.25	2°	I.1 is the grandparent of III.4
I.1 (g1-b1-i1)	IV.1 (g4-b1-i1)	inbred	0.25	3° + 3°	I.1 is a double great-grandparent of IV.1
I.2 (g1-b2-i1)	I.3 (g1-b3-i1)	outbred	0	U°	I.2 and I.3 are unrelated
I.2 (g1-b2-i1)	II.1 (G2-B1-S1)	outbred	0	U°	I.2 and II.1 are unrelated
I.2 (g1-b2-i1)	II.2 (g2-b1-s1)	outbred	0	U°	I.2 and II.2 are unrelated
I.2 (g1-b2-i1)	II.3 (g2-b1-i1)	outbred	0.5	1°	I.2 is the parent of II.3
I.2 (g1-b2-i1)	II.4 (g2-b2-i1)	outbred	0.5	1°	I.2 is the parent of II.4
I.2 (g1-b2-i1)	II.5 (g2-b2-s1)	outbred	0	U°	I.2 and II.5 are unrelated
I.2 (g1-b2-i1)	II.6 (g2-b3-i1)	outbred	0.5	1°	I.2 is the parent of II.6
I.2 (g1-b2-i1)	III.1 (g3-b1-i1)	outbred	0.25	2°	I.2 is the grandparent of III.1
I.2 (g1-b2-i1)	III.2 (g3-b2-i1)	outbred	0.25	2°	I.2 is the grandparent of III.2
I.2 (g1-b2-i1)	III.3 (g3-b3-i1)	inbred	0.5	2° + 2°	I.2 is a double grandparent of III.3
I.2 (g1-b2-i1)	III.4 (g3-b4-i1)	inbred	0.5	2° + 2°	I.2 is a double grandparent of III.4
I.2 (g1-b2-i1)	IV.1 (g4-b1-i1)	inbred	0.25	3° + 3°	I.2 is a double great-grandparent of IV.1
I.3 (g1-b3-i1)	II.1 (G2-B1-S1)	outbred	0	U°	I.3 and II.1 are unrelated
I.3 (g1-b3-i1)	II.2 (g2-b1-s1)	outbred	0	U°	I.3 and II.2 are unrelated
I.3 (g1-b3-i1)	II.3 (g2-b1-i1)	outbred	0	U°	I.3 and II.3 are unrelated
I.3 (g1-b3-i1)	II.4 (g2-b2-i1)	outbred	0	U°	I.3 and II.4 are unrelated
I.3 (g1-b3-i1)	II.5 (g2-b2-s1)	outbred	0	U°	I.3 and II.5 are unrelated
I.3 (g1-b3-i1)	II.6 (g2-b3-i1)	outbred	0.5	1°	I.3 is the parent of II.6
I.3 (g1-b3-i1)	III.1 (g3-b1-i1)	outbred	0	U°	I.3 and III.1 are unrelated
I.3 (g1-b3-i1)	III.2 (g3-b2-i1)	outbred	0	U°	I.3 and III.2 are unrelated
I.3 (g1-b3-i1)	III.3 (g3-b3-i1)	inbred	0	U°	I.3 and III.3 are unrelated
I.3 (g1-b3-i1)	III.4 (g3-b4-i1)	inbred	0.25	2°	I.3 is the grandparent of III.4
I.3 (g1-b3-i1)	IV.1 (g4-b1-i1)	inbred	0	U°	I.3 and IV.1 are unrelated
II.1 (G2-B1-S1)	II.2 (g2-b1-s1)	outbred	1	S°	G2-B1-S1 is the monozygotic twin of g2-b1-s1
II.1 (G2-B1-S1)	II.3 (g2-b1-i1)	outbred	0	U°	II.1 and II.3 are unrelated
II.1 (G2-B1-S1)	II.4 (g2-b2-i1)	outbred	0	U°	II.1 and II.4 are unrelated
II.1 (G2-B1-S1)	II.5 (g2-b2-s1)	outbred	0	U°	II.1 and II.5 are unrelated
II.1 (G2-B1-S1)	II.6 (g2-b3-i1)	outbred	0	U°	II.1 and II.6 are unrelated
II.1 (G2-B1-S1)	III.1 (g3-b1-i1)	outbred	0.5	1°	II.1 is genetically equivalent to a parent of III.1
II.1 (G2-B1-S1)	III.2 (g3-b2-i1)	outbred	0	U°	II.1 and III.2 are unrelated
II.1 (G2-B1-S1)	III.3 (g3-b3-i1)	inbred	0	U°	II.1 and III.3 are unrelated
II.1 (G2-B1-S1)	III.4 (g3-b4-i1)	inbred	0	U°	II.1 and III.4 are unrelated
II.1 (G2-B1-S1)	IV.1 (g4-b1-i1)	inbred	0.25	2°	II.1 is genetically equivalent to a grandparent of IV.1
II.2 (g2-b1-s1)	II.3 (g2-b1-i1)	outbred	0	U°	II.2 and II.3 are unrelated
II.2 (g2-b1-s1)	II.4 (g2-b2-i1)	outbred	0	U°	II.2 and II.4 are unrelated
II.2 (g2-b1-s1)	II.5 (g2-b2-s1)	outbred	0	U°	II.2 and II.5 are unrelated
II.2 (g2-b1-s1)	II.6 (g2-b3-i1)	outbred	0	U°	II.2 and II.6 are unrelated
II.2 (g2-b1-s1)	III.1 (g3-b1-i1)	outbred	0.5	1°	II.1 is the parent of III.1
II.2 (g2-b1-s1)	III.2 (g3-b2-i1)	outbred	0	U°	II.2 and III.2 are unrelated
II.2 (g2-b1-s1)	III.3 (g3-b3-i1)	inbred	0	U°	II.2 and III.3 are unrelated
II.2 (g2-b1-s1)	III.4 (g3-b4-i1)	inbred	0	U°	II.2 and III.4 are unrelated
II.2 (g2-b1-s1)	IV.1 (g4-b1-i1)	inbred	0.25	2°	II.2 is the grandparent of IV.1
II.3 (g2-b1-i1)	II.4 (g2-b2-i1)	outbred	0.5	1°	II.3 is the sibling of II.4
II.3 (g2-b1-i1)	II.5 (g2-b2-s1)	outbred	0	U°	II.3 and II.5 are unrelated
II.3 (g2-b1-i1)	II.6 (g2-b3-i1)	outbred	0.25	2°	II.3 is the half-sibling of II.6
II.3 (g2-b1-i1)	III.1 (g3-b1-i1)	outbred	0	1°	II.3 is the parent of III.1
II.3 (g2-b1-i1)	III.2 (g3-b2-i1)	outbred	0.25	2°	II.3 shares an avuncular relationship with III.2
II.3 (g2-b1-i1)	III.3 (g3-b3-i1)	inbred	0.75	1° + 2°	II.3 is the parent of III.3 | II.3 shares an avuncular relationship with III.3
II.3 (g2-b1-i1)	III.4 (g3-b4-i1)	inbred	0.625	1° + 3°	II.3 is the parent of III.4 | II.3 shares a half-avuncular relationship with III.4
II.3 (g2-b1-i1)	IV.1 (g4-b1-i1)	inbred	0.375	2° + 3°	II.3 is the grandparent of IV.1 | II.3 shares a grand-avuncular relationship with IV.1
II.4 (g2-b2-i1)	II.5 (g2-b2-s1)	outbred	0	U°	II.4 and II.5 are unrelated
II.4 (g2-b2-i1)	II.6 (g2-b3-i1)	outbred	0.25	2°	II.4 is the half-sibling of II.6
II.4 (g2-b2-i1)	III.1 (g3-b1-i1)	outbred	0.25	2°	II.4 shares an avuncular relationship with III.1
II.4 (g2-b2-i1)	III.2 (g3-b2-i1)	outbred	0.5	1°	II.4 is the parent of III.2
II.4 (g2-b2-i1)	III.3 (g3-b3-i1)	inbred	0.75	1° + 2°	II.4 is the parent of III.3 | II.4 shares an avuncular relationship wih III.3
II.4 (g2-b2-i1)	III.4 (g3-b4-i1)	inbred	0.375	2° + 3°	II.4 shares an avuncular relationship with III.4 | II.4 shares a half-avuncular relationship with III.4
II.4 (g2-b2-i1)	IV.1 (g4-b1-i1)	inbred	0.375	2° + 3°	II.4 is a grandparent of IV.1 | II.4 shares a grand-avuncular relationship with IV.1
II.5 (g2-b2-s1)	II.6 (g2-b3-i1)	outbred	0	U°	II.5 and II.6 are unrelated
II.5 (g2-b2-s1)	III.1 (g3-b1-i1)	outbred	0	U°	II.5 and III.1 are unrelated
II.5 (g2-b2-s1)	III.2 (g3-b2-i1)	outbred	0.5	1°	II.5 is the parent of III.2
II.5 (g2-b2-s1)	III.3 (g3-b3-i1)	inbred	0	U°	II.5 and III.3 are unrelated
II.5 (g2-b2-s1)	III.4 (g3-b4-i1)	inbred	0	U°	II.5 and III.4 are unrelated
II.5 (g2-b2-s1)	IV.1 (g4-b1-i1)	inbred	0.25	2°	II.5 is the grandparent of IV.1
II.6 (g2-b3-i1)	III.1 (g3-b1-i1)	outbred	0.125	3°	II.6 shares a half-avuncular relationship with III.1
II.6 (g2-b3-i1)	III.2 (g3-b2-i1)	outbred	0.125	3°	II.6 shares a half-avuncular relationship with III.2
II.6 (g2-b3-i1)	III.3 (g3-b3-i1)	inbred	0.25	3° + 3°	II.6 shares a double half-avuncular relationship with III.3
II.6 (g2-b3-i1)	III.4 (g3-b4-i1)	inbred	0.625	1° + 3°	II.6 is a parent of III.3 | II.6 shares a half-avuncular relationship with III.4
II.6 (g2-b3-i1)	IV.1 (g4-b1-i1)	inbred	0.125	4° + 4°	II.6 shares a double half-grand-avuncular relationship with IV.1
III.1 (g3-b1-i1)	III.2 (g3-b2-i1)	outbred	0.125	3°	III.1 is a full-cousin of III.2
III.1 (g3-b1-i1)	III.3 (g3-b3-i1)	inbred	0.375	2° + 3°	III.1 is a half-sibling of III.3 | III.1 is a full-cousin of III.3
III.1 (g3-b1-i1)	III.4 (g3-b4-i1)	inbred	0.3125	2° + 4°	III.1 is a half-sibling of III.4 | III.1 is a half-cousin of III.4
III.1 (g3-b1-i1)	IV.1 (g4-b1-i1)	inbred	0.5625	1° + 4°	III.1 is a parent of IV.1 | III.1 is a first-cousin once removed of IV.1
III.2 (g3-b2-i1)	III.3 (g3-b3-i1)	inbred	0.375	2° + 3°	III.2 is a half sibling of III.3 | III.2 is a full-cousin of III.3
III.2 (g3-b2-i1)	III.4 (g3-b4-i1)	inbred	0.1875	3° + 4°	III.2 is a full-cousin of III.4 | III.2 is a half-cousin of III.4
III.2 (g3-b2-i1)	IV.1 (g4-b1-i1)	inbred	0.5625	1° + 4°	III.2 is the parent of IV.1 | III.2 is a full-cousin once removed of IV.1
III.3 (g3-b3-i1)	III.4 (g3-b4-i1)	inbred	0.25	2° + 3° + 4° + 4°	III.3 is a half-sibling of III.4 | III.3 is a full-cousin of III.4 | III.3 is a double half-cousin of III.4
III.3 (g3-b3-i1)	IV.1 (g4-b1-i1)	inbred	0.375	3° + 3° + 4° + 4°	III.3 shares a double half-avuncular relationship with IV.1 | III.3 is a double full-cousin once removed of IV.1
III.4 (g3-b4-i1)	IV.1 (g4-b1-i1)	inbred	0.25	3° + 4° + 5° + 5°	III.4 shares a half-avuncular relationship with IV.1 | III.4 is a first-cousin once removed of IV.1 | III.4 is a double half-cousin once removed of IV.4

## Sheet: S3
# Supplementary Table S3: Nominal multiclass performance statistics, obtained across every parameter configuration, tested method, and expected degree of relatedness.
# analysis: label of the analysis conducted
# pedigree: label of the pedigree used
# pop: label of the reference population for founder individuals
# pmd-rescaler: name of the PMD rescaling / masking method applied
# contam: rate of modern human contamination
# contam.pop: label of the population used as a source for contaminants
# depth: average simulated sequencing depth (gargammel)
# method: name of the considered genetic relatedness estimation method
# degree: label of the considered degree of relatedness
# sensitivity: one vs. all sensitivity (a.k.a Recall) of the considered method – i.e.: TP / (TP + FN)
# specificity: one vs. all specificity – I.e.: TN / (TN+FP)
# precision: one vs. all Precision – i.e.: TP / (TP + FP)
# prevalence: one vs. all prevalence – i.e.: (TP+FN) / (TP+FP+TN+FN)
# PPV: one vs. all Positive Predictive Value – i.e.: (Sensitivity x Prevalence)/((Sensitivity x Prevalence) + ((1 – Specificity)x(1 – Prevalence)))
# NPV: one vs. all Nositive Predictive Value – i.e.: (Specificity x (1 – Prevalence))/(((1 - Sensitivity) x Prevalence) + (Specificity x (1 - Prevalence)))
# F1: one vs all F1-score I.e 2 x (Precision x Sensitivity) / (Precision + Sensitivity)
# DR: one vs. all detection rate – i.e.: TP/(TP+TN+FP+FN)
# DP: one vs. all Detection Prevalence – i.e.: (TP + FP)/(TP + TN + FP + FN)
# bal.acc : one vs. all Balanced Accuracy – i.e.: (Sensitivity + Specificity) / 2
analysis	pedigree	pop	pmd-rescaler	contam	contam.pop	depth	method	degree	sensitivity	specificity	precision	prevalence	F1	PPV	NPV	DR	DP	bal.acc
coverage	outbred	CEU	pmd-mask	0%	N/A	0.02X	correctKin	U	0.963333	0.594	0.415827	0.230769	0.580905	0.415827	0.981818	0.222308	0.534615	0.778667
coverage	outbred	CEU	pmd-mask	0%	N/A	0.02X	correctKin	3°	0.0133333	1	1	0.230769	0.0263158	1	0.771605	0.00307692	0.00307692	0.506667
coverage	outbred	CEU	pmd-mask	0%	N/A	0.02X	correctKin	2°	0.303333	0.883	0.4375	0.230769	0.358268	0.4375	0.808608	0.07	0.16	0.593167
coverage	outbred	CEU	pmd-mask	0%	N/A	0.02X	correctKin	1°	0.706667	0.928	0.746479	0.230769	0.726027	0.746479	0.913386	0.163077	0.218462	0.817333
coverage	outbred	CEU	pmd-mask	0%	N/A	0.02X	correctKin	S	0.95	0.988333	0.87156	0.0769231	0.909091	0.87156	0.995802	0.0730769	0.0838462	0.969167
coverage	outbred	CEU	pmd-mask	0%	N/A	0.02X	GRUPS	U	0.623333	0.883	0.615132	0.230769	0.619205	0.615132	0.886546	0.143846	0.233846	0.753167
coverage	outbred	CEU	pmd-mask	0%	N/A	0.02X	GRUPS	3°	0.393333	0.839	0.422939	0.230769	0.407599	0.422939	0.821743	0.0907692	0.214615	0.616167
coverage	outbred	CEU	pmd-mask	0%	N/A	0.02X	GRUPS	2°	0.426667	0.805	0.396285	0.230769	0.410915	0.396285	0.823951	0.0984615	0.248462	0.615833
coverage	outbred	CEU	pmd-mask	0%	N/A	0.02X	GRUPS	1°	0.713333	0.926	0.743056	0.230769	0.727891	0.743056	0.91502	0.164615	0.221538	0.819667
coverage	outbred	CEU	pmd-mask	0%	N/A	0.02X	GRUPS	S	0.96	0.991667	0.90566	0.0769231	0.932039	0.90566	0.99665	0.0738462	0.0815385	0.975833
coverage	outbred	CEU	pmd-mask	0%	N/A	0.02X	TKGWV2	U	0.816667	0.779	0.525751	0.230769	0.639687	0.525751	0.934053	0.188462	0.358462	0.797833
coverage	outbred	CEU	pmd-mask	0%	N/A	0.02X	TKGWV2	3°	0	1	N/A	0.230769	N/A	N/A	0.769231	0	0	0.5
coverage	outbred	CEU	pmd-mask	0%	N/A	0.02X	TKGWV2	2°	0.613333	0.762	0.436019	0.230769	0.509695	0.436019	0.867882	0.141538	0.324615	0.687667
coverage	outbred	CEU	pmd-mask	0%	N/A	0.02X	TKGWV2	1°	0.626667	0.934	0.740157	0.230769	0.6787	0.740157	0.892925	0.144615	0.195385	0.780333
coverage	outbred	CEU	pmd-mask	0%	N/A	0.02X	TKGWV2	S	1	0.951667	0.632911	0.0769231	0.775194	0.632911	1	0.0769231	0.121538	0.975833
coverage	outbred	CEU	pmd-mask	0%	N/A	0.02X	KIN	U	0.913333	0.641	0.432859	0.230769	0.587353	0.432859	0.961019	0.210769	0.486923	0.777167
coverage	outbred	CEU	pmd-mask	0%	N/A	0.02X	KIN	3°	0.143333	0.902	0.304965	0.230769	0.195011	0.304965	0.778257	0.0330769	0.108462	0.522667
coverage	outbred	CEU	pmd-mask	0%	N/A	0.02X	KIN	2°	0.283333	0.866	0.388128	0.230769	0.327553	0.388128	0.80111	0.0653846	0.168462	0.574667
coverage	outbred	CEU	pmd-mask	0%	N/A	0.02X	KIN	1°	0.58	0.961	0.816901	0.230769	0.678363	0.816901	0.884085	0.133846	0.163846	0.7705
coverage	outbred	CEU	pmd-mask	0%	N/A	0.02X	KIN	S	0.9	0.996667	0.957447	0.0769231	0.927835	0.957447	0.991708	0.0692308	0.0723077	0.948333
coverage	outbred	CEU	pmd-mask	0%	N/A	0.02X	READv2	U	0.966667	0.516	0.374677	0.230769	0.540037	0.374677	0.980989	0.223077	0.595385	0.741333
coverage	outbred	CEU	pmd-mask	0%	N/A	0.02X	READv2	3°	0	1	N/A	0.230769	N/A	N/A	0.769231	0	0	0.5
coverage	outbred	CEU	pmd-mask	0%	N/A	0.02X	READv2	2°	0.296667	0.86	0.388646	0.230769	0.336484	0.388646	0.802988	0.0684615	0.176154	0.578333
coverage	outbred	CEU	pmd-mask	0%	N/A	0.02X	READv2	1°	0.536667	0.964	0.817259	0.230769	0.647887	0.817259	0.87398	0.123846	0.151538	0.750333
coverage	outbred	CEU	pmd-mask	0%	N/A	0.02X	READv2	S	0.93	0.994167	0.93	0.0769231	0.93	0.93	0.994167	0.0715385	0.0769231	0.962083
coverage	outbred	CEU	pmd-mask	0%	N/A	0.04X	correctKin	U	0.97	0.842	0.648107	0.230769	0.777036	0.648107	0.989424	0.223846	0.345385	0.906
coverage	outbred	CEU	pmd-mask	0%	N/A	0.04X	correctKin	3°	0.363333	0.947	0.67284	0.230769	0.471861	0.67284	0.832162	0.0838462	0.124615	0.655167
coverage	outbred	CEU	pmd-mask	0%	N/A	0.04X	correctKin	2°	0.713333	0.924	0.737931	0.230769	0.725424	0.737931	0.914851	0.164615	0.223077	0.818667
coverage	outbred	CEU	pmd-mask	0%	N/A	0.04X	correctKin	1°	0.923333	0.978	0.926421	0.230769	0.924875	0.926421	0.977023	0.213077	0.23	0.950667
coverage	outbred	CEU	pmd-mask	0%	N/A	0.04X	correctKin	S	1	1	1	0.0769231	1	1	1	0.0769231	0.0769231	1
coverage	outbred	CEU	pmd-mask	0%	N/A	0.04X	GRUPS	U	0.793333	0.921	0.750789	0.230769	0.771475	0.750789	0.936928	0.183077	0.243846	0.857167
coverage	outbred	CEU	pmd-mask	0%	N/A	0.04X	GRUPS	3°	0.59	0.861	0.560127	0.230769	0.574675	0.560127	0.875	0.136154	0.243077	0.7255
coverage	outbred	CEU	pmd-mask	0%	N/A	0.04X	GRUPS	2°	0.656667	0.917	0.703571	0.230769	0.67931	0.703571	0.89902	0.151538	0.215385	0.786833
coverage	outbred	CEU	pmd-mask	0%	N/A	0.04X	GRUPS	1°	0.913333	0.987	0.954704	0.230769	0.93356	0.954704	0.974334	0.210769	0.220769	0.950167
coverage	outbred	CEU	pmd-mask	0%	N/A	0.04X	GRUPS	S	1	1	1	0.0769231	1	1	1	0.0769231	0.0769231	1
coverage	outbred	CEU	pmd-mask	0%	N/A	0.04X	TKGWV2	U	0.98	0.828	0.630901	0.230769	0.767624	0.630901	0.992806	0.226154	0.358462	0.904
coverage	outbred	CEU	pmd-mask	0%	N/A	0.04X	TKGWV2	3°	0	1	N/A	0.230769	N/A	N/A	0.769231	0	0	0.5
coverage	outbred	CEU	pmd-mask	0%	N/A	0.04X	TKGWV2	2°	0.876667	0.825	0.600457	0.230769	0.712737	0.600457	0.957077	0.202308	0.336923	0.850833
coverage	outbred	CEU	pmd-mask	0%	N/A	0.04X	TKGWV2	1°	0.9	0.984	0.944056	0.230769	0.921502	0.944056	0.970414	0.207692	0.22	0.942
coverage	outbred	CEU	pmd-mask	0%	N/A	0.04X	TKGWV2	S	1	0.991667	0.909091	0.0769231	0.952381	0.909091	1	0.0769231	0.0846154	0.995833
coverage	outbred	CEU	pmd-mask	0%	N/A	0.04X	KIN	U	0.98	0.692	0.488372	0.230769	0.651885	0.488372	0.991404	0.226154	0.463077	0.836
coverage	outbred	CEU	pmd-mask	0%	N/A	0.04X	KIN	3°	0.186667	0.898	0.35443	0.230769	0.244541	0.35443	0.78634	0.0430769	0.121538	0.542333
coverage	outbred	CEU	pmd-mask	0%	N/A	0.04X	KIN	2°	0.403333	0.893	0.530702	0.230769	0.458333	0.530702	0.833022	0.0930769	0.175385	0.648167
coverage	outbred	CEU	pmd-mask	0%	N/A	0.04X	KIN	1°	0.69	0.994	0.971831	0.230769	0.807018	0.971831	0.914443	0.159231	0.163846	0.842
coverage	outbred	CEU	pmd-mask	0%	N/A	0.04X	KIN	S	0.99	1	1	0.0769231	0.994975	1	0.999167	0.0761538	0.0761538	0.995
coverage	outbred	CEU	pmd-mask	0%	N/A	0.04X	READv2	U	1	0.536	0.39267	0.230769	0.56391	0.39267	1	0.230769	0.587692	0.768
coverage	outbred	CEU	pmd-mask	0%	N/A	0.04X	READv2	3°	0	1	N/A	0.230769	N/A	N/A	0.769231	0	0	0.5
coverage	outbred	CEU	pmd-mask	0%	N/A	0.04X	READv2	2°	0.396667	0.886	0.51073	0.230769	0.446529	0.51073	0.830366	0.0915385	0.179231	0.641333
coverage	outbred	CEU	pmd-mask	0%	N/A	0.04X	READv2	1°	0.663333	0.996	0.980296	0.230769	0.791252	0.980296	0.907931	0.153077	0.156154	0.829667
coverage	outbred	CEU	pmd-mask	0%	N/A	0.04X	READv2	S	1	1	1	0.0769231	1	1	1	0.0769231	0.0769231	1
coverage	outbred	CEU	pmd-mask	0%	N/A	0.06X	correctKin	U	0.973333	0.9	0.744898	0.230769	0.843931	0.744898	0.991189	0.224615	0.301538	0.936667
coverage	outbred	CEU	pmd-mask	0%	N/A	0.06X	correctKin	3°	0.586667	0.95	0.778761	0.230769	0.669202	0.778761	0.884544	0.135385	0.173846	0.768333
coverage	outbred	CEU	pmd-mask	0%	N/A	0.06X	correctKin	2°	0.85	0.972	0.90106	0.230769	0.874786	0.90106	0.955752	0.196154	0.217692	0.911
coverage	outbred	CEU	pmd-mask	0%	N/A	0.06X	correctKin	1°	0.986667	0.997	0.989967	0.230769	0.988314	0.989967	0.996004	0.227692	0.23	0.991833
coverage	outbred	CEU	pmd-mask	0%	N/A	0.06X	correctKin	S	1	1	1	0.0769231	1	1	1	0.0769231	0.0769231	1
coverage	outbred	CEU	pmd-mask	0%	N/A	0.06X	GRUPS	U	0.89	0.936	0.806647	0.230769	0.846276	0.806647	0.965944	0.205385	0.254615	0.913
coverage	outbred	CEU	pmd-mask	0%	N/A	0.06X	GRUPS	3°	0.673333	0.905	0.680135	0.230769	0.676717	0.680135	0.902293	0.155385	0.228462	0.789167
coverage	outbred	CEU	pmd-mask	0%	N/A	0.06X	GRUPS	2°	0.776667	0.955	0.838129	0.230769	0.806228	0.838129	0.934442	0.179231	0.213846	0.865833
coverage	outbred	CEU	pmd-mask	0%	N/A	0.06X	GRUPS	1°	0.963333	0.995	0.982993	0.230769	0.973064	0.982993	0.989066	0.222308	0.226154	0.979167
coverage	outbred	CEU	pmd-mask	0%	N/A	0.06X	GRUPS	S	1	1	1	0.0769231	1	1	1	0.0769231	0.0769231	1
coverage	outbred	CEU	pmd-mask	0%	N/A	0.06X	TKGWV2	U	0.993333	0.836	0.645022	0.230769	0.782152	0.645022	0.997613	0.229231	0.355385	0.914667
coverage	outbred	CEU	pmd-mask	0%	N/A	0.06X	TKGWV2	3°	0	1	N/A	0.230769	N/A	N/A	0.769231	0	0	0.5
coverage	outbred	CEU	pmd-mask	0%	N/A	0.06X	TKGWV2	2°	0.983333	0.854	0.668934	0.230769	0.796221	0.668934	0.994179	0.226923	0.339231	0.918667
coverage	outbred	CEU	pmd-mask	0%	N/A	0.06X	TKGWV2	1°	0.976667	0.997	0.989865	0.230769	0.983221	0.989865	0.993028	0.225385	0.227692	0.986833
coverage	outbred	CEU	pmd-mask	0%	N/A	0.06X	TKGWV2	S	1	0.999167	0.990099	0.0769231	0.995025	0.990099	1	0.0769231	0.0776923	0.999583
coverage	outbred	CEU	pmd-mask	0%	N/A	0.06X	KIN	U	0.996667	0.756	0.550645	0.230769	0.709371	0.550645	0.998679	0.23	0.417692	0.876333
coverage	outbred	CEU	pmd-mask	0%	N/A	0.06X	KIN	3°	0.243333	0.882	0.382199	0.230769	0.297352	0.382199	0.795311	0.0561538	0.146923	0.562667
coverage	outbred	CEU	pmd-mask	0%	N/A	0.06X	KIN	2°	0.516667	0.947	0.745192	0.230769	0.610236	0.745192	0.867216	0.119231	0.16	0.731833
coverage	outbred	CEU	pmd-mask	0%	N/A	0.06X	KIN	1°	0.853333	0.998	0.992248	0.230769	0.917563	0.992248	0.957774	0.196923	0.198462	0.925667
coverage	outbred	CEU	pmd-mask	0%	N/A	0.06X	KIN	S	1	1	1	0.0769231	1	1	1	0.0769231	0.0769231	1
coverage	outbred	CEU	pmd-mask	0%	N/A	0.06X	READv2	U	1	0.565	0.408163	0.230769	0.57971	0.408163	1	0.230769	0.565385	0.7825
coverage	outbred	CEU	pmd-mask	0%	N/A	0.06X	READv2	3°	0	1	N/A	0.230769	N/A	N/A	0.769231	0	0	0.5
coverage	outbred	CEU	pmd-mask	0%	N/A	0.06X	READv2	2°	0.503333	0.942	0.722488	0.230769	0.59332	0.722488	0.863428	0.116154	0.160769	0.722667
coverage	outbred	CEU	pmd-mask	0%	N/A	0.06X	READv2	1°	0.846667	0.998	0.992188	0.230769	0.913669	0.992188	0.955939	0.195385	0.196923	0.922333
coverage	outbred	CEU	pmd-mask	0%	N/A	0.06X	READv2	S	1	1	1	0.0769231	1	1	1	0.0769231	0.0769231	1
coverage	outbred	CEU	pmd-mask	0%	N/A	0.08X	correctKin	U	1	0.927	0.80429	0.230769	0.89153	0.80429	1	0.230769	0.286923	0.9635
coverage	outbred	CEU	pmd-mask	0%	N/A	0.08X	correctKin	3°	0.683333	0.976	0.895197	0.230769	0.775047	0.895197	0.911298	0.157692	0.176154	0.829667
coverage	outbred	CEU	pmd-mask	0%	N/A	0.08X	correctKin	2°	0.916667	0.975	0.916667	0.230769	0.916667	0.916667	0.975	0.211538	0.230769	0.945833
coverage	outbred	CEU	pmd-mask	0%	N/A	0.08X	correctKin	1°	0.99	0.999	0.996644	0.230769	0.993311	0.996644	0.997006	0.228462	0.229231	0.9945
coverage	outbred	CEU	pmd-mask	0%	N/A	0.08X	correctKin	S	1	1	1	0.0769231	1	1	1	0.0769231	0.0769231	1
coverage	outbred	CEU	pmd-mask	0%	N/A	0.08X	GRUPS	U	0.953333	0.957	0.869301	0.230769	0.90938	0.869301	0.985582	0.22	0.253077	0.955167
coverage	outbred	CEU	pmd-mask	0%	N/A	0.08X	GRUPS	3°	0.806667	0.936	0.79085	0.230769	0.79868	0.79085	0.94165	0.186154	0.235385	0.871333
coverage	outbred	CEU	pmd-mask	0%	N/A	0.08X	GRUPS	2°	0.833333	0.979	0.922509	0.230769	0.875657	0.922509	0.951409	0.192308	0.208462	0.906167
coverage	outbred	CEU	pmd-mask	0%	N/A	0.08X	GRUPS	1°	0.98	1	1	0.230769	0.989899	1	0.994036	0.226154	0.226154	0.99
coverage	outbred	CEU	pmd-mask	0%	N/A	0.08X	GRUPS	S	1	1	1	0.0769231	1	1	1	0.0769231	0.0769231	1
coverage	outbred	CEU	pmd-mask	0%	N/A	0.08X	TKGWV2	U	1	0.841	0.653595	0.230769	0.790514	0.653595	1	0.230769	0.353077	0.9205
coverage	outbred	CEU	pmd-mask	0%	N/A	0.08X	TKGWV2	3°	0	1	N/A	0.230769	N/A	N/A	0.769231	0	0	0.5
coverage	outbred	CEU	pmd-mask	0%	N/A	0.08X	TKGWV2	2°	0.99	0.855	0.671946	0.230769	0.800539	0.671946	0.996503	0.228462	0.34	0.9225
coverage	outbred	CEU	pmd-mask	0%	N/A	0.08X	TKGWV2	1°	0.993333	0.999	0.996656	0.230769	0.994992	0.996656	0.998002	0.229231	0.23	0.996167
coverage	outbred	CEU	pmd-mask	0%	N/A	0.08X	TKGWV2	S	1	1	1	0.0769231	1	1	1	0.0769231	0.0769231	1
coverage	outbred	CEU	pmd-mask	0%	N/A	0.08X	KIN	U	1	0.771	0.567108	0.230769	0.723764	0.567108	1	0.230769	0.406923	0.8855
coverage	outbred	CEU	pmd-mask	0%	N/A	0.08X	KIN	3°	0.26	0.904	0.448276	0.230769	0.329114	0.448276	0.802842	0.06	0.133846	0.582
coverage	outbred	CEU	pmd-mask	0%	N/A	0.08X	KIN	2°	0.643333	0.961	0.831897	0.230769	0.725564	0.831897	0.899813	0.148462	0.178462	0.802167
coverage	outbred	CEU	pmd-mask	0%	N/A	0.08X	KIN	1°	0.883333	1	1	0.230769	0.938053	1	0.966184	0.203846	0.203846	0.941667
coverage	outbred	CEU	pmd-mask	0%	N/A	0.08X	KIN	S	1	1	1	0.0769231	1	1	1	0.0769231	0.0769231	1
coverage	outbred	CEU	pmd-mask	0%	N/A	0.08X	READv2	U	1	0.585	0.41958	0.230769	0.591133	0.41958	1	0.230769	0.55	0.7925
coverage	outbred	CEU	pmd-mask	0%	N/A	0.08X	READv2	3°	0	1	N/A	0.230769	N/A	N/A	0.769231	0	0	0.5
coverage	outbred	CEU	pmd-mask	0%	N/A	0.08X	READv2	2°	0.606667	0.969	0.85446	0.230769	0.709552	0.85446	0.891444	0.14	0.163846	0.787833
coverage	outbred	CEU	pmd-mask	0%	N/A	0.08X	READv2	1°	0.906667	1	1	0.230769	0.951049	1	0.972763	0.209231	0.209231	0.953333
coverage	outbred	CEU	pmd-mask	0%	N/A	0.08X	READv2	S	1	1	1	0.0769231	1	1	1	0.0769231	0.0769231	1
coverage	outbred	CEU	pmd-mask	0%	N/A	0.10X	correctKin	U	1	0.927	0.80429	0.230769	0.89153	0.80429	1	0.230769	0.286923	0.9635
coverage	outbred	CEU	pmd-mask	0%	N/A	0.10X	correctKin	3°	0.706667	0.976	0.898305	0.230769	0.791045	0.898305	0.917293	0.163077	0.181538	0.841333
coverage	outbred	CEU	pmd-mask	0%	N/A	0.10X	correctKin	2°	0.916667	0.983	0.941781	0.230769	0.929054	0.941781	0.975198	0.211538	0.224615	0.949833
coverage	outbred	CEU	pmd-mask	0%	N/A	0.10X	correctKin	1°	0.993333	0.999	0.996656	0.230769	0.994992	0.996656	0.998002	0.229231	0.23	0.996167
coverage	outbred	CEU	pmd-mask	0%	N/A	0.10X	correctKin	S	1	1	1	0.0769231	1	1	1	0.0769231	0.0769231	1
coverage	outbred	CEU	pmd-mask	0%	N/A	0.10X	GRUPS	U	0.973333	0.962	0.884848	0.230769	0.926984	0.884848	0.991753	0.224615	0.253846	0.967667
coverage	outbred	CEU	pmd-mask	0%	N/A	0.10X	GRUPS	3°	0.816667	0.939	0.800654	0.230769	0.808581	0.800654	0.944668	0.188462	0.235385	0.877833
coverage	outbred	CEU	pmd-mask	0%	N/A	0.10X	GRUPS	2°	0.823333	0.98	0.925094	0.230769	0.871252	0.925094	0.948693	0.19	0.205385	0.901667
coverage	outbred	CEU	pmd-mask	0%	N/A	0.10X	GRUPS	1°	0.99	1	1	0.230769	0.994975	1	0.997009	0.228462	0.228462	0.995
coverage	outbred	CEU	pmd-mask	0%	N/A	0.10X	GRUPS	S	1	1	1	0.0769231	1	1	1	0.0769231	0.0769231	1
coverage	outbred	CEU	pmd-mask	0%	N/A	0.10X	TKGWV2	U	1	0.831	0.639659	0.230769	0.780234	0.639659	1	0.230769	0.360769	0.9155
coverage	outbred	CEU	pmd-mask	0%	N/A	0.10X	TKGWV2	3°	0	1	N/A	0.230769	N/A	N/A	0.769231	0	0	0.5
coverage	outbred	CEU	pmd-mask	0%	N/A	0.10X	TKGWV2	2°	0.99	0.865	0.6875	0.230769	0.811475	0.6875	0.996544	0.228462	0.332308	0.9275
coverage	outbred	CEU	pmd-mask	0%	N/A	0.10X	TKGWV2	1°	0.993333	0.999	0.996656	0.230769	0.994992	0.996656	0.998002	0.229231	0.23	0.996167
coverage	outbred	CEU	pmd-mask	0%	N/A	0.10X	TKGWV2	S	1	1	1	0.0769231	1	1	1	0.0769231	0.0769231	1
coverage	outbred	CEU	pmd-mask	0%	N/A	0.10X	KIN	U	1	0.786	0.583658	0.230769	0.737101	0.583658	1	0.230769	0.395385	0.893
coverage	outbred	CEU	pmd-mask	0%	N/A	0.10X	KIN	3°	0.31	0.895	0.469697	0.230769	0.373494	0.469697	0.81216	0.0715385	0.152308	0.6025
coverage	outbred	CEU	pmd-mask	0%	N/A	0.10X	KIN	2°	0.623333	0.983	0.916667	0.230769	0.742063	0.916667	0.896898	0.143846	0.156923	0.803167
coverage	outbred	CEU	pmd-mask	0%	N/A	0.10X	KIN	1°	0.946667	1	1	0.230769	0.972603	1	0.984252	0.218462	0.218462	0.973333
coverage	outbred	CEU	pmd-mask	0%	N/A	0.10X	KIN	S	1	1	1	0.0769231	1	1	1	0.0769231	0.0769231	1
coverage	outbred	CEU	pmd-mask	0%	N/A	0.10X	READv2	U	1	0.585	0.41958	0.230769	0.591133	0.41958	1	0.230769	0.55	0.7925
coverage	outbred	CEU	pmd-mask	0%	N/A	0.10X	READv2	3°	0	1	N/A	0.230769	N/A	N/A	0.769231	0	0	0.5
coverage	outbred	CEU	pmd-mask	0%	N/A	0.10X	READv2	2°	0.603333	0.99	0.947644	0.230769	0.737271	0.947644	0.892696	0.139231	0.146923	0.796667
coverage	outbred	CEU	pmd-mask	0%	N/A	0.10X	READv2	1°	0.98	1	1	0.230769	0.989899	1	0.994036	0.226154	0.226154	0.99
coverage	outbred	CEU	pmd-mask	0%	N/A	0.10X	READv2	S	1	1	1	0.0769231	1	1	1	0.0769231	0.0769231	1
coverage	outbred	CEU	pmd-mask	0%	N/A	0.20X	correctKin	U	1	0.956	0.872093	0.230769	0.931677	0.872093	1	0.230769	0.264615	0.978
coverage	outbred	CEU	pmd-mask	0%	N/A	0.20X	correctKin	3°	0.843333	0.989	0.958333	0.230769	0.897163	0.958333	0.954633	0.194615	0.203077	0.916167
coverage	outbred	CEU	pmd-mask	0%	N/A	0.20X	correctKin	2°	0.963333	0.997	0.989726	0.230769	0.976351	0.989726	0.989087	0.222308	0.224615	0.980167
coverage	outbred	CEU	pmd-mask	0%	N/A	0.20X	correctKin	1°	1	1	1	0.230769	1	1	1	0.230769	0.230769	1
coverage	outbred	CEU	pmd-mask	0%	N/A	0.20X	correctKin	S	1	1	1	0.0769231	1	1	1	0.0769231	0.0769231	1
coverage	outbred	CEU	pmd-mask	0%	N/A	0.20X	GRUPS	U	1	0.997	0.990099	0.230769	0.995025	0.990099	1	0.230769	0.233077	0.9985
coverage	outbred	CEU	pmd-mask	0%	N/A	0.20X	GRUPS	3°	0.98	0.985	0.951456	0.230769	0.965517	0.951456	0.993946	0.226154	0.237692	0.9825
coverage	outbred	CEU	pmd-mask	0%	N/A	0.20X	GRUPS	2°	0.95	0.997	0.989583	0.230769	0.969388	0.989583	0.985178	0.219231	0.221538	0.9735
coverage	outbred	CEU	pmd-mask	0%	N/A	0.20X	GRUPS	1°	1	1	1	0.230769	1	1	1	0.230769	0.230769	1
coverage	outbred	CEU	pmd-mask	0%	N/A	0.20X	GRUPS	S	1	1	1	0.0769231	1	1	1	0.0769231	0.0769231	1
coverage	outbred	CEU	pmd-mask	0%	N/A	0.20X	TKGWV2	U	1	0.84	0.652174	0.230769	0.789474	0.652174	1	0.230769	0.353846	0.92
coverage	outbred	CEU	pmd-mask	0%	N/A	0.20X	TKGWV2	3°	0	1	N/A	0.230769	N/A	N/A	0.769231	0	0	0.5
coverage	outbred	CEU	pmd-mask	0%	N/A	0.20X	TKGWV2	2°	1	0.86	0.681818	0.230769	0.810811	0.681818	1	0.230769	0.338462	0.93
coverage	outbred	CEU	pmd-mask	0%	N/A	0.20X	TKGWV2	1°	1	1	1	0.230769	1	1	1	0.230769	0.230769	1
coverage	outbred	CEU	pmd-mask	0%	N/A	0.20X	TKGWV2	S	1	1	1	0.0769231	1	1	1	0.0769231	0.0769231	1
coverage	outbred	CEU	pmd-mask	0%	N/A	0.20X	KIN	U	1	0.834	0.643777	0.230769	0.78329	0.643777	1	0.230769	0.358462	0.917
coverage	outbred	CEU	pmd-mask	0%	N/A	0.20X	KIN	3°	0.44	0.974	0.835443	0.230769	0.576419	0.835443	0.85289	0.101538	0.121538	0.707
coverage	outbred	CEU	pmd-mask	0%	N/A	0.20X	KIN	2°	0.913333	0.998	0.992754	0.230769	0.951389	0.992754	0.974609	0.210769	0.212308	0.955667
coverage	outbred	CEU	pmd-mask	0%	N/A	0.20X	KIN	1°	1	1	1	0.230769	1	1	1	0.230769	0.230769	1
coverage	outbred	CEU	pmd-mask	0%	N/A	0.20X	KIN	S	1	1	1	0.0769231	1	1	1	0.0769231	0.0769231	1
coverage	outbred	CEU	pmd-mask	0%	N/A	0.20X	READv2	U	1	0.971	0.911854	0.230769	0.953895	0.911854	1	0.230769	0.253077	0.9855
coverage	outbred	CEU	pmd-mask	0%	N/A	0.20X	READv2	3°	0.9	0.964	0.882353	0.230769	0.891089	0.882353	0.969819	0.207692	0.235385	0.932
coverage	outbred	CEU	pmd-mask	0%	N/A	0.20X	READv2	2°	0.88	0.998	0.992481	0.230769	0.932862	0.992481	0.965184	0.203077	0.204615	0.939
coverage	outbred	CEU	pmd-mask	0%	N/A	0.20X	READv2	1°	0.996667	1	1	0.230769	0.998331	1	0.999001	0.23	0.23	0.998333
coverage	outbred	CEU	pmd-mask	0%	N/A	0.20X	READv2	S	1	1	1	0.0769231	1	1	1	0.0769231	0.0769231	1
coverage	outbred	CEU	pmd-mask	0%	N/A	0.50X	correctKin	U	1	0.959	0.879765	0.230769	0.936037	0.879765	1	0.230769	0.262308	0.9795
coverage	outbred	CEU	pmd-mask	0%	N/A	0.50X	correctKin	3°	0.863333	0.992	0.970037	0.230769	0.91358	0.970037	0.96031	0.199231	0.205385	0.927667
coverage	outbred	CEU	pmd-mask	0%	N/A	0.50X	correctKin	2°	0.973333	1	1	0.230769	0.986486	1	0.992063	0.224615	0.224615	0.986667
coverage	outbred	CEU	pmd-mask	0%	N/A	0.50X	correctKin	1°	1	1	1	0.230769	1	1	1	0.230769	0.230769	1
coverage	outbred	CEU	pmd-mask	0%	N/A	0.50X	correctKin	S	1	1	1	0.0769231	1	1	1	0.0769231	0.0769231	1
coverage	outbred	CEU	pmd-mask	0%	N/A	0.50X	GRUPS	U	1	0.997	0.990099	0.230769	0.995025	0.990099	1	0.230769	0.233077	0.9985
coverage	outbred	CEU	pmd-mask	0%	N/A	0.50X	GRUPS	3°	0.99	0.99	0.967427	0.230769	0.978583	0.967427	0.996979	0.228462	0.236154	0.99
coverage	outbred	CEU	pmd-mask	0%	N/A	0.50X	GRUPS	2°	0.966667	1	1	0.230769	0.983051	1	0.990099	0.223077	0.223077	0.983333
coverage	outbred	CEU	pmd-mask	0%	N/A	0.50X	GRUPS	1°	1	1	1	0.230769	1	1	1	0.230769	0.230769	1
coverage	outbred	CEU	pmd-mask	0%	N/A	0.50X	GRUPS	S	1	1	1	0.0769231	1	1	1	0.0769231	0.0769231	1
coverage	outbred	CEU	pmd-mask	0%	N/A	0.50X	TKGWV2	U	1	0.834	0.643777	0.230769	0.78329	0.643777	1	0.230769	0.358462	0.917
coverage	outbred	CEU	pmd-mask	0%	N/A	0.50X	TKGWV2	3°	0	1	N/A	0.230769	N/A	N/A	0.769231	0	0	0.5
coverage	outbred	CEU	pmd-mask	0%	N/A	0.50X	TKGWV2	2°	0.996667	0.865	0.68894	0.230769	0.814714	0.68894	0.998845	0.23	0.333846	0.930833
coverage	outbred	CEU	pmd-mask	0%	N/A	0.50X	TKGWV2	1°	0.996667	1	1	0.230769	0.998331	1	0.999001	0.23	0.23	0.998333
coverage	outbred	CEU	pmd-mask	0%	N/A	0.50X	TKGWV2	S	1	0.999167	0.990099	0.0769231	0.995025	0.990099	1	0.0769231	0.0776923	0.999583
coverage	outbred	CEU	pmd-mask	0%	N/A	0.50X	KIN	U	1	0.901	0.75188	0.230769	0.858369	0.75188	1	0.230769	0.306923	0.9505
coverage	outbred	CEU	pmd-mask	0%	N/A	0.50X	KIN	3°	0.653333	0.983	0.920188	0.230769	0.764133	0.920188	0.904324	0.150769	0.163846	0.818167
coverage	outbred	CEU	pmd-mask	0%	N/A	0.50X	KIN	2°	0.943333	0.995	0.982639	0.230769	0.962585	0.982639	0.983202	0.217692	0.221538	0.969167
coverage	outbred	CEU	pmd-mask	0%	N/A	0.50X	KIN	1°	1	1	1	0.230769	1	1	1	0.230769	0.230769	1
coverage	outbred	CEU	pmd-mask	0%	N/A	0.50X	KIN	S	1	1	1	0.0769231	1	1	1	0.0769231	0.0769231	1
coverage	outbred	CEU	pmd-mask	0%	N/A	0.50X	READv2	U	1	0.993	0.977199	0.230769	0.988468	0.977199	1	0.230769	0.236154	0.9965
coverage	outbred	CEU	pmd-mask	0%	N/A	0.50X	READv2	3°	0.976667	0.981	0.939103	0.230769	0.957516	0.939103	0.992915	0.225385	0.24	0.978833
coverage	outbred	CEU	pmd-mask	0%	N/A	0.50X	READv2	2°	0.936667	1	1	0.230769	0.967298	1	0.981354	0.216154	0.216154	0.968333
coverage	outbred	CEU	pmd-mask	0%	N/A	0.50X	READv2	1°	1	1	1	0.230769	1	1	1	0.230769	0.230769	1
coverage	outbred	CEU	pmd-mask	0%	N/A	0.50X	READv2	S	1	1	1	0.0769231	1	1	1	0.0769231	0.0769231	1
coverage	outbred	CEU	pmd-mask	0%	N/A	1.00X	correctKin	U	1	0.958	0.877193	0.230769	0.934579	0.877193	1	0.230769	0.263077	0.979
coverage	outbred	CEU	pmd-mask	0%	N/A	1.00X	correctKin	3°	0.856667	0.986	0.948339	0.230769	0.900175	0.948339	0.958212	0.197692	0.208462	0.921333
coverage	outbred	CEU	pmd-mask	0%	N/A	1.00X	correctKin	2°	0.95	0.998	0.993031	0.230769	0.971039	0.993031	0.985192	0.219231	0.220769	0.974
coverage	outbred	CEU	pmd-mask	0%	N/A	1.00X	correctKin	1°	0.996667	0.999	0.996667	0.230769	0.996667	0.996667	0.999	0.23	0.230769	0.997833
coverage	outbred	CEU	pmd-mask	0%	N/A	1.00X	correctKin	S	1	1	1	0.0769231	1	1	1	0.0769231	0.0769231	1
coverage	outbred	CEU	pmd-mask	0%	N/A	1.00X	GRUPS	U	1	0.999	0.996678	0.230769	0.998336	0.996678	1	0.230769	0.231538	0.9995
coverage	outbred	CEU	pmd-mask	0%	N/A	1.00X	GRUPS	3°	0.993333	0.98	0.937107	0.230769	0.964401	0.937107	0.997963	0.229231	0.244615	0.986667
coverage	outbred	CEU	pmd-mask	0%	N/A	1.00X	GRUPS	2°	0.93	0.998	0.992883	0.230769	0.960413	0.992883	0.979392	0.214615	0.216154	0.964
coverage	outbred	CEU	pmd-mask	0%	N/A	1.00X	GRUPS	1°	0.996667	0.999	0.996667	0.230769	0.996667	0.996667	0.999	0.23	0.230769	0.997833
coverage	outbred	CEU	pmd-mask	0%	N/A	1.00X	GRUPS	S	1	1	1	0.0769231	1	1	1	0.0769231	0.0769231	1
coverage	outbred	CEU	pmd-mask	0%	N/A	1.00X	TKGWV2	U	1	0.844	0.657895	0.230769	0.793651	0.657895	1	0.230769	0.350769	0.922
coverage	outbred	CEU	pmd-mask	0%	N/A	1.00X	TKGWV2	3°	0	1	N/A	0.230769	N/A	N/A	0.769231	0	0	0.5
coverage	outbred	CEU	pmd-mask	0%	N/A	1.00X	TKGWV2	2°	0.993333	0.854	0.671171	0.230769	0.801075	0.671171	0.997664	0.229231	0.341538	0.923667
coverage	outbred	CEU	pmd-mask	0%	N/A	1.00X	TKGWV2	1°	0.993333	0.998	0.993333	0.230769	0.993333	0.993333	0.998	0.229231	0.230769	0.995667
coverage	outbred	CEU	pmd-mask	0%	N/A	1.00X	TKGWV2	S	1	1	1	0.0769231	1	1	1	0.0769231	0.0769231	1
coverage	outbred	CEU	pmd-mask	0%	N/A	1.00X	KIN	U	1	0.926	0.802139	0.230769	0.890208	0.802139	1	0.230769	0.287692	0.963
coverage	outbred	CEU	pmd-mask	0%	N/A	1.00X	KIN	3°	0.71	0.98	0.914163	0.230769	0.79925	0.914163	0.918463	0.163846	0.179231	0.845
coverage	outbred	CEU	pmd-mask	0%	N/A	1.00X	KIN	2°	0.933333	0.982	0.939597	0.230769	0.936455	0.939597	0.98004	0.215385	0.229231	0.957667
coverage	outbred	CEU	pmd-mask	0%	N/A	1.00X	KIN	1°	0.983333	0.998	0.993266	0.230769	0.988275	0.993266	0.995015	0.226923	0.228462	0.990667
coverage	outbred	CEU	pmd-mask	0%	N/A	1.00X	KIN	S	0.98	1	1	0.0769231	0.989899	1	0.998336	0.0753846	0.0753846	0.99
coverage	outbred	CEU	pmd-mask	0%	N/A	1.00X	READv2	U	1	0.996	0.986842	0.230769	0.993377	0.986842	1	0.230769	0.233846	0.998
coverage	outbred	CEU	pmd-mask	0%	N/A	1.00X	READv2	3°	0.983333	0.978	0.930599	0.230769	0.95624	0.930599	0.994914	0.226923	0.243846	0.980667
coverage	outbred	CEU	pmd-mask	0%	N/A	1.00X	READv2	2°	0.923333	0.998	0.992832	0.230769	0.956822	0.992832	0.977473	0.213077	0.214615	0.960667
coverage	outbred	CEU	pmd-mask	0%	N/A	1.00X	READv2	1°	0.996667	0.999	0.996667	0.230769	0.996667	0.996667	0.999	0.23	0.230769	0.997833
coverage	outbred	CEU	pmd-mask	0%	N/A	1.00X	READv2	S	1	1	1	0.0769231	1	1	1	0.0769231	0.0769231	1
pmd-rescaling	outbred	CEU	mapDamage2	0%	N/A	0.02X	correctKin	U	0.923333	0.662	0.450407	0.230769	0.605464	0.450407	0.966423	0.213077	0.473077	0.792667
pmd-rescaling	outbred	CEU	mapDamage2	0%	N/A	0.02X	correctKin	3°	0.0233333	0.988	0.368421	0.230769	0.0438871	0.368421	0.771272	0.00538462	0.0146154	0.505667
pmd-rescaling	outbred	CEU	mapDamage2	0%	N/A	0.02X	correctKin	2°	0.46	0.863	0.501818	0.230769	0.48	0.501818	0.841951	0.106154	0.211538	0.6615
pmd-rescaling	outbred	CEU	mapDamage2	0%	N/A	0.02X	correctKin	1°	0.786667	0.945	0.810997	0.230769	0.798646	0.810997	0.936571	0.181538	0.223846	0.865833
pmd-rescaling	outbred	CEU	mapDamage2	0%	N/A	0.02X	correctKin	S	0.96	0.996667	0.96	0.0769231	0.96	0.96	0.996667	0.0738462	0.0769231	0.978333
pmd-rescaling	outbred	CEU	mapDamage2	0%	N/A	0.02X	GRUPS	U	0.45	0.93	0.658537	0.230769	0.534653	0.658537	0.849315	0.103846	0.157692	0.69
pmd-rescaling	outbred	CEU	mapDamage2	0%	N/A	0.02X	GRUPS	3°	0.383333	0.825	0.396552	0.230769	0.389831	0.396552	0.816832	0.0884615	0.223077	0.604167
pmd-rescaling	outbred	CEU	mapDamage2	0%	N/A	0.02X	GRUPS	2°	0.526667	0.793	0.432877	0.230769	0.475188	0.432877	0.848128	0.121538	0.280769	0.659833
pmd-rescaling	outbred	CEU	mapDamage2	0%	N/A	0.02X	GRUPS	1°	0.816667	0.916	0.744681	0.230769	0.779014	0.744681	0.943357	0.188462	0.253077	0.866333
pmd-rescaling	outbred	CEU	mapDamage2	0%	N/A	0.02X	GRUPS	S	0.99	0.99	0.891892	0.0769231	0.938389	0.891892	0.999159	0.0761538	0.0853846	0.99
pmd-rescaling	outbred	CEU	mapDamage2	0%	N/A	0.02X	TKGWV2	U	0.756667	0.834	0.577608	0.230769	0.655123	0.577608	0.919515	0.174615	0.302308	0.795333
pmd-rescaling	outbred	CEU	mapDamage2	0%	N/A	0.02X	TKGWV2	3°	0	1	N/A	0.230769	N/A	N/A	0.769231	0	0	0.5
pmd-rescaling	outbred	CEU	mapDamage2	0%	N/A	0.02X	TKGWV2	2°	0.673333	0.733	0.430704	0.230769	0.525358	0.430704	0.88207	0.155385	0.360769	0.703167
pmd-rescaling	outbred	CEU	mapDamage2	0%	N/A	0.02X	TKGWV2	1°	0.656667	0.926	0.726937	0.230769	0.690018	0.726937	0.899903	0.151538	0.208462	0.791333
pmd-rescaling	outbred	CEU	mapDamage2	0%	N/A	0.02X	TKGWV2	S	1	0.944167	0.598802	0.0769231	0.749064	0.598802	1	0.0769231	0.128462	0.972083
pmd-rescaling	outbred	CEU	mapDamage2	0%	N/A	0.02X	KIN	U	0.91	0.635	0.4279	0.230769	0.58209	0.4279	0.959215	0.21	0.490769	0.7725
pmd-rescaling	outbred	CEU	mapDamage2	0%	N/A	0.02X	KIN	3°	0.143333	0.901	0.302817	0.230769	0.19457	0.302817	0.778066	0.0330769	0.109231	0.522167
pmd-rescaling	outbred	CEU	mapDamage2	0%	N/A	0.02X	KIN	2°	0.293333	0.876	0.415094	0.230769	0.34375	0.415094	0.805147	0.0676923	0.163077	0.584667
pmd-rescaling	outbred	CEU	mapDamage2	0%	N/A	0.02X	KIN	1°	0.62	0.969	0.857143	0.230769	0.719536	0.857143	0.894737	0.143077	0.166923	0.7945
pmd-rescaling	outbred	CEU	mapDamage2	0%	N/A	0.02X	KIN	S	0.91	1	1	0.0769231	0.95288	1	0.992556	0.07	0.07	0.955
pmd-rescaling	outbred	CEU	mapDamage2	0%	N/A	0.02X	READv2	U	0.97	0.503	0.369289	0.230769	0.534926	0.369289	0.982422	0.223846	0.606154	0.7365
pmd-rescaling	outbred	CEU	mapDamage2	0%	N/A	0.02X	READv2	3°	0	1	N/A	0.230769	N/A	N/A	0.769231	0	0	0.5
pmd-rescaling	outbred	CEU	mapDamage2	0%	N/A	0.02X	READv2	2°	0.28	0.866	0.385321	0.230769	0.324324	0.385321	0.80037	0.0646154	0.167692	0.573
pmd-rescaling	outbred	CEU	mapDamage2	0%	N/A	0.02X	READv2	1°	0.58	0.974	0.87	0.230769	0.696	0.87	0.885455	0.133846	0.153846	0.777
pmd-rescaling	outbred	CEU	mapDamage2	0%	N/A	0.02X	READv2	S	0.92	0.998333	0.978723	0.0769231	0.948454	0.978723	0.993367	0.0707692	0.0723077	0.959167
pmd-rescaling	outbred	CEU	mapDamage2	0%	N/A	0.04X	correctKin	U	0.946667	0.895	0.730077	0.230769	0.824383	0.730077	0.982437	0.218462	0.299231	0.920833
pmd-rescaling	outbred	CEU	mapDamage2	0%	N/A	0.04X	correctKin	3°	0.483333	0.936	0.69378	0.230769	0.569745	0.69378	0.857929	0.111538	0.160769	0.709667
pmd-rescaling	outbred	CEU	mapDamage2	0%	N/A	0.04X	correctKin	2°	0.756667	0.924	0.749175	0.230769	0.752902	0.749175	0.92678	0.174615	0.233077	0.840333
pmd-rescaling	outbred	CEU	mapDamage2	0%	N/A	0.04X	correctKin	1°	0.936667	0.982	0.939799	0.230769	0.93823	0.939799	0.981019	0.216154	0.23	0.959333
pmd-rescaling	outbred	CEU	mapDamage2	0%	N/A	0.04X	correctKin	S	1	1	1	0.0769231	1	1	1	0.0769231	0.0769231	1
pmd-rescaling	outbred	CEU	mapDamage2	0%	N/A	0.04X	GRUPS	U	0.603333	0.985	0.923469	0.230769	0.729839	0.923469	0.89221	0.139231	0.150769	0.794167
pmd-rescaling	outbred	CEU	mapDamage2	0%	N/A	0.04X	GRUPS	3°	0.59	0.858	0.554859	0.230769	0.57189	0.554859	0.874618	0.136154	0.245385	0.724
pmd-rescaling	outbred	CEU	mapDamage2	0%	N/A	0.04X	GRUPS	2°	0.763333	0.878	0.652422	0.230769	0.703533	0.652422	0.925184	0.176154	0.27	0.820667
pmd-rescaling	outbred	CEU	mapDamage2	0%	N/A	0.04X	GRUPS	1°	0.986667	0.962	0.886228	0.230769	0.933754	0.886228	0.995859	0.227692	0.256923	0.974333
pmd-rescaling	outbred	CEU	mapDamage2	0%	N/A	0.04X	GRUPS	S	1	1	1	0.0769231	1	1	1	0.0769231	0.0769231	1
pmd-rescaling	outbred	CEU	mapDamage2	0%	N/A	0.04X	TKGWV2	U	0.903333	0.904	0.73842	0.230769	0.812594	0.73842	0.968917	0.208462	0.282308	0.903667
pmd-rescaling	outbred	CEU	mapDamage2	0%	N/A	0.04X	TKGWV2	3°	0	1	N/A	0.230769	N/A	N/A	0.769231	0	0	0.5
pmd-rescaling	outbred	CEU	mapDamage2	0%	N/A	0.04X	TKGWV2	2°	0.87	0.755	0.51581	0.230769	0.647643	0.51581	0.950882	0.200769	0.389231	0.8125
pmd-rescaling	outbred	CEU	mapDamage2	0%	N/A	0.04X	TKGWV2	1°	0.936667	0.969	0.900641	0.230769	0.918301	0.900641	0.980769	0.216154	0.24	0.952833
pmd-rescaling	outbred	CEU	mapDamage2	0%	N/A	0.04X	TKGWV2	S	1	0.9875	0.869565	0.0769231	0.930233	0.869565	1	0.0769231	0.0884615	0.99375
pmd-rescaling	outbred	CEU	mapDamage2	0%	N/A	0.04X	KIN	U	0.98	0.695	0.490818	0.230769	0.65406	0.490818	0.991441	0.226154	0.460769	0.8375
pmd-rescaling	outbred	CEU	mapDamage2	0%	N/A	0.04X	KIN	3°	0.2	0.884	0.340909	0.230769	0.252101	0.340909	0.786477	0.0461538	0.135385	0.542
pmd-rescaling	outbred	CEU	mapDamage2	0%	N/A	0.04X	KIN	2°	0.396667	0.893	0.526549	0.230769	0.452471	0.526549	0.831471	0.0915385	0.173846	0.644833
pmd-rescaling	outbred	CEU	mapDamage2	0%	N/A	0.04X	KIN	1°	0.66	0.999	0.994975	0.230769	0.793587	0.994975	0.907357	0.152308	0.153077	0.8295
pmd-rescaling	outbred	CEU	mapDamage2	0%	N/A	0.04X	KIN	S	1	1	1	0.0769231	1	1	1	0.0769231	0.0769231	1
pmd-rescaling	outbred	CEU	mapDamage2	0%	N/A	0.04X	READv2	U	1	0.532	0.390625	0.230769	0.561798	0.390625	1	0.230769	0.590769	0.766
pmd-rescaling	outbred	CEU	mapDamage2	0%	N/A	0.04X	READv2	3°	0	1	N/A	0.230769	N/A	N/A	0.769231	0	0	0.5
pmd-rescaling	outbred	CEU	mapDamage2	0%	N/A	0.04X	READv2	2°	0.416667	0.893	0.538793	0.230769	0.469925	0.538793	0.836142	0.0961538	0.178462	0.654833
pmd-rescaling	outbred	CEU	mapDamage2	0%	N/A	0.04X	READv2	1°	0.66	0.998	0.99	0.230769	0.792	0.99	0.907273	0.152308	0.153846	0.829
pmd-rescaling	outbred	CEU	mapDamage2	0%	N/A	0.04X	READv2	S	1	1	1	0.0769231	1	1	1	0.0769231	0.0769231	1
pmd-rescaling	outbred	CEU	mapDamage2	0%	N/A	0.06X	correctKin	U	0.966667	0.931	0.807799	0.230769	0.880121	0.807799	0.989373	0.223077	0.276154	0.948833
pmd-rescaling	outbred	CEU	mapDamage2	0%	N/A	0.06X	correctKin	3°	0.693333	0.961	0.842105	0.230769	0.760512	0.842105	0.912631	0.16	0.19	0.827167
pmd-rescaling	outbred	CEU	mapDamage2	0%	N/A	0.06X	correctKin	2°	0.89	0.972	0.905085	0.230769	0.897479	0.905085	0.967164	0.205385	0.226923	0.931
pmd-rescaling	outbred	CEU	mapDamage2	0%	N/A	0.06X	correctKin	1°	0.986667	0.997	0.989967	0.230769	0.988314	0.989967	0.996004	0.227692	0.23	0.991833
pmd-rescaling	outbred	CEU	mapDamage2	0%	N/A	0.06X	correctKin	S	1	1	1	0.0769231	1	1	1	0.0769231	0.0769231	1
pmd-rescaling	outbred	CEU	mapDamage2	0%	N/A	0.06X	GRUPS	U	0.606667	0.994	0.968085	0.230769	0.745902	0.968085	0.893885	0.14	0.144615	0.800333
pmd-rescaling	outbred	CEU	mapDamage2	0%	N/A	0.06X	GRUPS	3°	0.663333	0.871	0.606707	0.230769	0.633758	0.606707	0.896091	0.153077	0.252308	0.767167
pmd-rescaling	outbred	CEU	mapDamage2	0%	N/A	0.06X	GRUPS	2°	0.903333	0.903	0.736413	0.230769	0.811377	0.736413	0.968884	0.208462	0.283077	0.903167
pmd-rescaling	outbred	CEU	mapDamage2	0%	N/A	0.06X	GRUPS	1°	0.996667	0.983	0.946203	0.230769	0.970779	0.946203	0.998984	0.23	0.243077	0.989833
pmd-rescaling	outbred	CEU	mapDamage2	0%	N/A	0.06X	GRUPS	S	1	1	1	0.0769231	1	1	1	0.0769231	0.0769231	1
pmd-rescaling	outbred	CEU	mapDamage2	0%	N/A	0.06X	TKGWV2	U	0.973333	0.912	0.768421	0.230769	0.858824	0.768421	0.991304	0.224615	0.292308	0.942667
pmd-rescaling	outbred	CEU	mapDamage2	0%	N/A	0.06X	TKGWV2	3°	0	1	N/A	0.230769	N/A	N/A	0.769231	0	0	0.5
pmd-rescaling	outbred	CEU	mapDamage2	0%	N/A	0.06X	TKGWV2	2°	0.96	0.778	0.564706	0.230769	0.711111	0.564706	0.98481	0.221538	0.392308	0.869
pmd-rescaling	outbred	CEU	mapDamage2	0%	N/A	0.06X	TKGWV2	1°	0.993333	0.989	0.964401	0.230769	0.978654	0.964401	0.997982	0.229231	0.237692	0.991167
pmd-rescaling	outbred	CEU	mapDamage2	0%	N/A	0.06X	TKGWV2	S	1	0.999167	0.990099	0.0769231	0.995025	0.990099	1	0.0769231	0.0776923	0.999583
pmd-rescaling	outbred	CEU	mapDamage2	0%	N/A	0.06X	KIN	U	0.996667	0.753	0.547619	0.230769	0.706856	0.547619	0.998674	0.23	0.42	0.874833
pmd-rescaling	outbred	CEU	mapDamage2	0%	N/A	0.06X	KIN	3°	0.246667	0.882	0.385417	0.230769	0.300813	0.385417	0.796029	0.0569231	0.147692	0.564333
pmd-rescaling	outbred	CEU	mapDamage2	0%	N/A	0.06X	KIN	2°	0.516667	0.952	0.763547	0.230769	0.616302	0.763547	0.867821	0.119231	0.156154	0.734333
pmd-rescaling	outbred	CEU	mapDamage2	0%	N/A	0.06X	KIN	1°	0.853333	0.997	0.988417	0.230769	0.915921	0.988417	0.957733	0.196923	0.199231	0.925167
pmd-rescaling	outbred	CEU	mapDamage2	0%	N/A	0.06X	KIN	S	1	1	1	0.0769231	1	1	1	0.0769231	0.0769231	1
pmd-rescaling	outbred	CEU	mapDamage2	0%	N/A	0.06X	READv2	U	1	0.558	0.404313	0.230769	0.575816	0.404313	1	0.230769	0.570769	0.779
pmd-rescaling	outbred	CEU	mapDamage2	0%	N/A	0.06X	READv2	3°	0	1	N/A	0.230769	N/A	N/A	0.769231	0	0	0.5
pmd-rescaling	outbred	CEU	mapDamage2	0%	N/A	0.06X	READv2	2°	0.496667	0.958	0.780105	0.230769	0.606925	0.780105	0.863841	0.114615	0.146923	0.727333
pmd-rescaling	outbred	CEU	mapDamage2	0%	N/A	0.06X	READv2	1°	0.88	0.997	0.988764	0.230769	0.931217	0.988764	0.96515	0.203077	0.205385	0.9385
pmd-rescaling	outbred	CEU	mapDamage2	0%	N/A	0.06X	READv2	S	1	1	1	0.0769231	1	1	1	0.0769231	0.0769231	1
pmd-rescaling	outbred	CEU	mapDamage2	0%	N/A	0.08X	correctKin	U	0.996667	0.959	0.879412	0.230769	0.934375	0.879412	0.998958	0.23	0.261538	0.977833
pmd-rescaling	outbred	CEU	mapDamage2	0%	N/A	0.08X	correctKin	3°	0.78	0.986	0.943548	0.230769	0.854015	0.943548	0.937262	0.18	0.190769	0.883
pmd-rescaling	outbred	CEU	mapDamage2	0%	N/A	0.08X	correctKin	2°	0.953333	0.972	0.910828	0.230769	0.931596	0.910828	0.985801	0.22	0.241538	0.962667
pmd-rescaling	outbred	CEU	mapDamage2	0%	N/A	0.08X	correctKin	1°	0.99	0.999	0.996644	0.230769	0.993311	0.996644	0.997006	0.228462	0.229231	0.9945
pmd-rescaling	outbred	CEU	mapDamage2	0%	N/A	0.08X	correctKin	S	1	1	1	0.0769231	1	1	1	0.0769231	0.0769231	1
pmd-rescaling	outbred	CEU	mapDamage2	0%	N/A	0.08X	GRUPS	U	0.646667	0.996	0.979798	0.230769	0.779116	0.979798	0.903811	0.149231	0.152308	0.821333
pmd-rescaling	outbred	CEU	mapDamage2	0%	N/A	0.08X	GRUPS	3°	0.72	0.886	0.654545	0.230769	0.685714	0.654545	0.913402	0.166154	0.253846	0.803
pmd-rescaling	outbred	CEU	mapDamage2	0%	N/A	0.08X	GRUPS	2°	0.94	0.919	0.77686	0.230769	0.850679	0.77686	0.98079	0.216923	0.279231	0.9295
pmd-rescaling	outbred	CEU	mapDamage2	0%	N/A	0.08X	GRUPS	1°	0.996667	0.99	0.967638	0.230769	0.981938	0.967638	0.998991	0.23	0.237692	0.993333
pmd-rescaling	outbred	CEU	mapDamage2	0%	N/A	0.08X	GRUPS	S	1	1	1	0.0769231	1	1	1	0.0769231	0.0769231	1
pmd-rescaling	outbred	CEU	mapDamage2	0%	N/A	0.08X	TKGWV2	U	1	0.938	0.828729	0.230769	0.906344	0.828729	1	0.230769	0.278462	0.969
pmd-rescaling	outbred	CEU	mapDamage2	0%	N/A	0.08X	TKGWV2	3°	0	1	N/A	0.230769	N/A	N/A	0.769231	0	0	0.5
pmd-rescaling	outbred	CEU	mapDamage2	0%	N/A	0.08X	TKGWV2	2°	0.986667	0.761	0.553271	0.230769	0.708982	0.553271	0.994771	0.227692	0.411538	0.873833
pmd-rescaling	outbred	CEU	mapDamage2	0%	N/A	0.08X	TKGWV2	1°	0.996667	0.996	0.986799	0.230769	0.991708	0.986799	0.998997	0.23	0.233077	0.996333
pmd-rescaling	outbred	CEU	mapDamage2	0%	N/A	0.08X	TKGWV2	S	1	1	1	0.0769231	1	1	1	0.0769231	0.0769231	1
pmd-rescaling	outbred	CEU	mapDamage2	0%	N/A	0.08X	KIN	U	1	0.767	0.562852	0.230769	0.720288	0.562852	1	0.230769	0.41	0.8835
pmd-rescaling	outbred	CEU	mapDamage2	0%	N/A	0.08X	KIN	3°	0.253333	0.897	0.424581	0.230769	0.317328	0.424581	0.800178	0.0584615	0.137692	0.575167
pmd-rescaling	outbred	CEU	mapDamage2	0%	N/A	0.08X	KIN	2°	0.623333	0.968	0.853881	0.230769	0.720617	0.853881	0.895467	0.143846	0.168462	0.795667
pmd-rescaling	outbred	CEU	mapDamage2	0%	N/A	0.08X	KIN	1°	0.896667	1	1	0.230769	0.945518	1	0.969932	0.206923	0.206923	0.948333
pmd-rescaling	outbred	CEU	mapDamage2	0%	N/A	0.08X	KIN	S	1	1	1	0.0769231	1	1	1	0.0769231	0.0769231	1
pmd-rescaling	outbred	CEU	mapDamage2	0%	N/A	0.08X	READv2	U	1	0.576	0.414365	0.230769	0.585938	0.414365	1	0.230769	0.556923	0.788
pmd-rescaling	outbred	CEU	mapDamage2	0%	N/A	0.08X	READv2	3°	0	1	N/A	0.230769	N/A	N/A	0.769231	0	0	0.5
pmd-rescaling	outbred	CEU	mapDamage2	0%	N/A	0.08X	READv2	2°	0.58	0.975	0.874372	0.230769	0.697395	0.874372	0.885559	0.133846	0.153077	0.7775
pmd-rescaling	outbred	CEU	mapDamage2	0%	N/A	0.08X	READv2	1°	0.923333	1	1	0.230769	0.960139	1	0.977517	0.213077	0.213077	0.961667
pmd-rescaling	outbred	CEU	mapDamage2	0%	N/A	0.08X	READv2	S	1	1	1	0.0769231	1	1	1	0.0769231	0.0769231	1
pmd-rescaling	outbred	CEU	mapDamage2	0%	N/A	0.10X	correctKin	U	1	0.96	0.882353	0.230769	0.9375	0.882353	1	0.230769	0.261538	0.98
pmd-rescaling	outbred	CEU	mapDamage2	0%	N/A	0.10X	correctKin	3°	0.813333	0.985	0.942085	0.230769	0.872987	0.942085	0.946206	0.187692	0.199231	0.899167
pmd-rescaling	outbred	CEU	mapDamage2	0%	N/A	0.10X	correctKin	2°	0.946667	0.981	0.937294	0.230769	0.941957	0.937294	0.983952	0.218462	0.233077	0.963833
pmd-rescaling	outbred	CEU	mapDamage2	0%	N/A	0.10X	correctKin	1°	0.99	0.999	0.996644	0.230769	0.993311	0.996644	0.997006	0.228462	0.229231	0.9945
pmd-rescaling	outbred	CEU	mapDamage2	0%	N/A	0.10X	correctKin	S	1	1	1	0.0769231	1	1	1	0.0769231	0.0769231	1
pmd-rescaling	outbred	CEU	mapDamage2	0%	N/A	0.10X	GRUPS	U	0.716667	1	1	0.230769	0.834951	1	0.921659	0.165385	0.165385	0.858333
pmd-rescaling	outbred	CEU	mapDamage2	0%	N/A	0.10X	GRUPS	3°	0.756667	0.909	0.713836	0.230769	0.734628	0.713836	0.925662	0.174615	0.244615	0.832833
pmd-rescaling	outbred	CEU	mapDamage2	0%	N/A	0.10X	GRUPS	2°	0.96	0.925	0.793388	0.230769	0.868778	0.793388	0.987193	0.221538	0.279231	0.9425
pmd-rescaling	outbred	CEU	mapDamage2	0%	N/A	0.10X	GRUPS	1°	0.993333	0.994	0.980263	0.230769	0.986755	0.980263	0.997992	0.229231	0.233846	0.993667
pmd-rescaling	outbred	CEU	mapDamage2	0%	N/A	0.10X	GRUPS	S	1	1	1	0.0769231	1	1	1	0.0769231	0.0769231	1
pmd-rescaling	outbred	CEU	mapDamage2	0%	N/A	0.10X	TKGWV2	U	1	0.933	0.817439	0.230769	0.89955	0.817439	1	0.230769	0.282308	0.9665
pmd-rescaling	outbred	CEU	mapDamage2	0%	N/A	0.10X	TKGWV2	3°	0	1	N/A	0.230769	N/A	N/A	0.769231	0	0	0.5
pmd-rescaling	outbred	CEU	mapDamage2	0%	N/A	0.10X	TKGWV2	2°	0.99	0.765	0.558271	0.230769	0.713942	0.558271	0.996094	0.228462	0.409231	0.8775
pmd-rescaling	outbred	CEU	mapDamage2	0%	N/A	0.10X	TKGWV2	1°	0.993333	0.997	0.990033	0.230769	0.991681	0.990033	0.997998	0.229231	0.231538	0.995167
pmd-rescaling	outbred	CEU	mapDamage2	0%	N/A	0.10X	TKGWV2	S	1	1	1	0.0769231	1	1	1	0.0769231	0.0769231	1
pmd-rescaling	outbred	CEU	mapDamage2	0%	N/A	0.10X	KIN	U	1	0.788	0.585938	0.230769	0.738916	0.585938	1	0.230769	0.393846	0.894
pmd-rescaling	outbred	CEU	mapDamage2	0%	N/A	0.10X	KIN	3°	0.303333	0.9	0.47644	0.230769	0.370672	0.47644	0.811542	0.07	0.146923	0.601667
pmd-rescaling	outbred	CEU	mapDamage2	0%	N/A	0.10X	KIN	2°	0.65	0.986	0.933014	0.230769	0.766208	0.933014	0.903758	0.15	0.160769	0.818
pmd-rescaling	outbred	CEU	mapDamage2	0%	N/A	0.10X	KIN	1°	0.96	1	1	0.230769	0.979592	1	0.988142	0.221538	0.221538	0.98
pmd-rescaling	outbred	CEU	mapDamage2	0%	N/A	0.10X	KIN	S	1	1	1	0.0769231	1	1	1	0.0769231	0.0769231	1
pmd-rescaling	outbred	CEU	mapDamage2	0%	N/A	0.10X	READv2	U	1	0.597	0.426743	0.230769	0.598205	0.426743	1	0.230769	0.540769	0.7985
pmd-rescaling	outbred	CEU	mapDamage2	0%	N/A	0.10X	READv2	3°	0	1	N/A	0.230769	N/A	N/A	0.769231	0	0	0.5
pmd-rescaling	outbred	CEU	mapDamage2	0%	N/A	0.10X	READv2	2°	0.653333	0.992	0.960784	0.230769	0.777778	0.960784	0.905109	0.150769	0.156923	0.822667
pmd-rescaling	outbred	CEU	mapDamage2	0%	N/A	0.10X	READv2	1°	0.976667	1	1	0.230769	0.988196	1	0.993049	0.225385	0.225385	0.988333
pmd-rescaling	outbred	CEU	mapDamage2	0%	N/A	0.10X	READv2	S	1	1	1	0.0769231	1	1	1	0.0769231	0.0769231	1
pmd-rescaling	outbred	CEU	mapDamage2	0%	N/A	0.20X	correctKin	U	1	0.981	0.940439	0.230769	0.969305	0.940439	1	0.230769	0.245385	0.9905
pmd-rescaling	outbred	CEU	mapDamage2	0%	N/A	0.20X	correctKin	3°	0.913333	0.991	0.968198	0.230769	0.939966	0.968198	0.974435	0.210769	0.217692	0.952167
pmd-rescaling	outbred	CEU	mapDamage2	0%	N/A	0.20X	correctKin	2°	0.97	0.993	0.97651	0.230769	0.973244	0.97651	0.991018	0.223846	0.229231	0.9815
pmd-rescaling	outbred	CEU	mapDamage2	0%	N/A	0.20X	correctKin	1°	1	1	1	0.230769	1	1	1	0.230769	0.230769	1
pmd-rescaling	outbred	CEU	mapDamage2	0%	N/A	0.20X	correctKin	S	1	1	1	0.0769231	1	1	1	0.0769231	0.0769231	1
pmd-rescaling	outbred	CEU	mapDamage2	0%	N/A	0.20X	GRUPS	U	0.786667	1	1	0.230769	0.880597	1	0.93985	0.181538	0.181538	0.893333
pmd-rescaling	outbred	CEU	mapDamage2	0%	N/A	0.20X	GRUPS	3°	0.78	0.935	0.782609	0.230769	0.781302	0.782609	0.934066	0.18	0.23	0.8575
pmd-rescaling	outbred	CEU	mapDamage2	0%	N/A	0.20X	GRUPS	2°	0.99	0.934	0.818182	0.230769	0.895928	0.818182	0.996798	0.228462	0.279231	0.962
pmd-rescaling	outbred	CEU	mapDamage2	0%	N/A	0.20X	GRUPS	1°	1	0.998	0.993377	0.230769	0.996678	0.993377	1	0.230769	0.232308	0.999
pmd-rescaling	outbred	CEU	mapDamage2	0%	N/A	0.20X	GRUPS	S	1	1	1	0.0769231	1	1	1	0.0769231	0.0769231	1
pmd-rescaling	outbred	CEU	mapDamage2	0%	N/A	0.20X	TKGWV2	U	1	0.954	0.867052	0.230769	0.928793	0.867052	1	0.230769	0.266154	0.977
pmd-rescaling	outbred	CEU	mapDamage2	0%	N/A	0.20X	TKGWV2	3°	0	1	N/A	0.230769	N/A	N/A	0.769231	0	0	0.5
pmd-rescaling	outbred	CEU	mapDamage2	0%	N/A	0.20X	TKGWV2	2°	0.996667	0.746	0.540687	0.230769	0.701055	0.540687	0.998661	0.23	0.425385	0.871333
pmd-rescaling	outbred	CEU	mapDamage2	0%	N/A	0.20X	TKGWV2	1°	1	0.999	0.996678	0.230769	0.998336	0.996678	1	0.230769	0.231538	0.9995
pmd-rescaling	outbred	CEU	mapDamage2	0%	N/A	0.20X	TKGWV2	S	1	1	1	0.0769231	1	1	1	0.0769231	0.0769231	1
pmd-rescaling	outbred	CEU	mapDamage2	0%	N/A	0.20X	KIN	U	1	0.854	0.672646	0.230769	0.80429	0.672646	1	0.230769	0.343077	0.927
pmd-rescaling	outbred	CEU	mapDamage2	0%	N/A	0.20X	KIN	3°	0.506667	0.977	0.868571	0.230769	0.64	0.868571	0.868444	0.116923	0.134615	0.741833
pmd-rescaling	outbred	CEU	mapDamage2	0%	N/A	0.20X	KIN	2°	0.923333	0.998	0.992832	0.230769	0.956822	0.992832	0.977473	0.213077	0.214615	0.960667
pmd-rescaling	outbred	CEU	mapDamage2	0%	N/A	0.20X	KIN	1°	1	1	1	0.230769	1	1	1	0.230769	0.230769	1
pmd-rescaling	outbred	CEU	mapDamage2	0%	N/A	0.20X	KIN	S	1	1	1	0.0769231	1	1	1	0.0769231	0.0769231	1
pmd-rescaling	outbred	CEU	mapDamage2	0%	N/A	0.20X	READv2	U	1	0.97	0.909091	0.230769	0.952381	0.909091	1	0.230769	0.253846	0.985
pmd-rescaling	outbred	CEU	mapDamage2	0%	N/A	0.20X	READv2	3°	0.896667	0.961	0.873377	0.230769	0.884868	0.873377	0.96875	0.206923	0.236923	0.928833
pmd-rescaling	outbred	CEU	mapDamage2	0%	N/A	0.20X	READv2	2°	0.87	0.999	0.996183	0.230769	0.928826	0.996183	0.962428	0.200769	0.201538	0.9345
pmd-rescaling	outbred	CEU	mapDamage2	0%	N/A	0.20X	READv2	1°	1	1	1	0.230769	1	1	1	0.230769	0.230769	1
pmd-rescaling	outbred	CEU	mapDamage2	0%	N/A	0.20X	READv2	S	1	1	1	0.0769231	1	1	1	0.0769231	0.0769231	1
pmd-rescaling	outbred	CEU	mapDamage2	0%	N/A	0.50X	correctKin	U	1	0.977	0.928793	0.230769	0.963082	0.928793	1	0.230769	0.248462	0.9885
pmd-rescaling	outbred	CEU	mapDamage2	0%	N/A	0.50X	correctKin	3°	0.92	0.995	0.982206	0.230769	0.950086	0.982206	0.976447	0.212308	0.216154	0.9575
pmd-rescaling	outbred	CEU	mapDamage2	0%	N/A	0.50X	correctKin	2°	0.983333	0.999	0.996622	0.230769	0.989933	0.996622	0.99502	0.226923	0.227692	0.991167
pmd-rescaling	outbred	CEU	mapDamage2	0%	N/A	0.50X	correctKin	1°	1	1	1	0.230769	1	1	1	0.230769	0.230769	1
pmd-rescaling	outbred	CEU	mapDamage2	0%	N/A	0.50X	correctKin	S	1	1	1	0.0769231	1	1	1	0.0769231	0.0769231	1
pmd-rescaling	outbred	CEU	mapDamage2	0%	N/A	0.50X	GRUPS	U	0.953333	1	1	0.230769	0.976109	1	0.986193	0.22	0.22	0.976667
pmd-rescaling	outbred	CEU	mapDamage2	0%	N/A	0.50X	GRUPS	3°	0.873333	0.986	0.949275	0.230769	0.909722	0.949275	0.962891	0.201538	0.212308	0.929667
pmd-rescaling	outbred	CEU	mapDamage2	0%	N/A	0.50X	GRUPS	2°	1	0.962	0.887574	0.230769	0.940439	0.887574	1	0.230769	0.26	0.981
pmd-rescaling	outbred	CEU	mapDamage2	0%	N/A	0.50X	GRUPS	1°	1	1	1	0.230769	1	1	1	0.230769	0.230769	1
pmd-rescaling	outbred	CEU	mapDamage2	0%	N/A	0.50X	GRUPS	S	1	1	1	0.0769231	1	1	1	0.0769231	0.0769231	1
pmd-rescaling	outbred	CEU	mapDamage2	0%	N/A	0.50X	TKGWV2	U	1	0.964	0.892857	0.230769	0.943396	0.892857	1	0.230769	0.258462	0.982
pmd-rescaling	outbred	CEU	mapDamage2	0%	N/A	0.50X	TKGWV2	3°	0	1	N/A	0.230769	N/A	N/A	0.769231	0	0	0.5
pmd-rescaling	outbred	CEU	mapDamage2	0%	N/A	0.50X	TKGWV2	2°	1	0.736	0.531915	0.230769	0.694444	0.531915	1	0.230769	0.433846	0.868
pmd-rescaling	outbred	CEU	mapDamage2	0%	N/A	0.50X	TKGWV2	1°	1	1	1	0.230769	1	1	1	0.230769	0.230769	1
pmd-rescaling	outbred	CEU	mapDamage2	0%	N/A	0.50X	TKGWV2	S	1	1	1	0.0769231	1	1	1	0.0769231	0.0769231	1
pmd-rescaling	outbred	CEU	mapDamage2	0%	N/A	0.50X	KIN	U	1	0.906	0.761421	0.230769	0.864553	0.761421	1	0.230769	0.303077	0.953
pmd-rescaling	outbred	CEU	mapDamage2	0%	N/A	0.50X	KIN	3°	0.666667	0.984	0.925926	0.230769	0.775194	0.925926	0.907749	0.153846	0.166154	0.825333
pmd-rescaling	outbred	CEU	mapDamage2	0%	N/A	0.50X	KIN	2°	0.946667	0.994	0.97931	0.230769	0.962712	0.97931	0.984158	0.218462	0.223077	0.970333
pmd-rescaling	outbred	CEU	mapDamage2	0%	N/A	0.50X	KIN	1°	1	1	1	0.230769	1	1	1	0.230769	0.230769	1
pmd-rescaling	outbred	CEU	mapDamage2	0%	N/A	0.50X	KIN	S	1	1	1	0.0769231	1	1	1	0.0769231	0.0769231	1
pmd-rescaling	outbred	CEU	mapDamage2	0%	N/A	0.50X	READv2	U	1	0.992	0.974026	0.230769	0.986842	0.974026	1	0.230769	0.236923	0.996
pmd-rescaling	outbred	CEU	mapDamage2	0%	N/A	0.50X	READv2	3°	0.973333	0.982	0.941935	0.230769	0.957377	0.941935	0.991919	0.224615	0.238462	0.977667
pmd-rescaling	outbred	CEU	mapDamage2	0%	N/A	0.50X	READv2	2°	0.94	1	1	0.230769	0.969072	1	0.982318	0.216923	0.216923	0.97
pmd-rescaling	outbred	CEU	mapDamage2	0%	N/A	0.50X	READv2	1°	1	1	1	0.230769	1	1	1	0.230769	0.230769	1
pmd-rescaling	outbred	CEU	mapDamage2	0%	N/A	0.50X	READv2	S	1	1	1	0.0769231	1	1	1	0.0769231	0.0769231	1
pmd-rescaling	outbred	CEU	mapDamage2	0%	N/A	1.00X	correctKin	U	1	0.973	0.917431	0.230769	0.956938	0.917431	1	0.230769	0.251538	0.9865
pmd-rescaling	outbred	CEU	mapDamage2	0%	N/A	1.00X	correctKin	3°	0.906667	0.988	0.957746	0.230769	0.931507	0.957746	0.972441	0.209231	0.218462	0.947333
pmd-rescaling	outbred	CEU	mapDamage2	0%	N/A	1.00X	correctKin	2°	0.956667	0.998	0.99308	0.230769	0.974533	0.99308	0.987141	0.220769	0.222308	0.977333
pmd-rescaling	outbred	CEU	mapDamage2	0%	N/A	1.00X	correctKin	1°	0.996667	0.999	0.996667	0.230769	0.996667	0.996667	0.999	0.23	0.230769	0.997833
pmd-rescaling	outbred	CEU	mapDamage2	0%	N/A	1.00X	correctKin	S	1	1	1	0.0769231	1	1	1	0.0769231	0.0769231	1
pmd-rescaling	outbred	CEU	mapDamage2	0%	N/A	1.00X	GRUPS	U	1	1	1	0.230769	1	1	1	0.230769	0.230769	1
pmd-rescaling	outbred	CEU	mapDamage2	0%	N/A	1.00X	GRUPS	3°	0.913333	1	1	0.230769	0.954704	1	0.974659	0.210769	0.210769	0.956667
pmd-rescaling	outbred	CEU	mapDamage2	0%	N/A	1.00X	GRUPS	2°	0.996667	0.973	0.917178	0.230769	0.955272	0.917178	0.998973	0.23	0.250769	0.984833
pmd-rescaling	outbred	CEU	mapDamage2	0%	N/A	1.00X	GRUPS	1°	0.996667	0.999	0.996667	0.230769	0.996667	0.996667	0.999	0.23	0.230769	0.997833
pmd-rescaling	outbred	CEU	mapDamage2	0%	N/A	1.00X	GRUPS	S	1	1	1	0.0769231	1	1	1	0.0769231	0.0769231	1
pmd-rescaling	outbred	CEU	mapDamage2	0%	N/A	1.00X	TKGWV2	U	1	0.95	0.857143	0.230769	0.923077	0.857143	1	0.230769	0.269231	0.975
pmd-rescaling	outbred	CEU	mapDamage2	0%	N/A	1.00X	TKGWV2	3°	0	1	N/A	0.230769	N/A	N/A	0.769231	0	0	0.5
pmd-rescaling	outbred	CEU	mapDamage2	0%	N/A	1.00X	TKGWV2	2°	0.996667	0.75	0.544627	0.230769	0.704358	0.544627	0.998668	0.23	0.422308	0.873333
pmd-rescaling	outbred	CEU	mapDamage2	0%	N/A	1.00X	TKGWV2	1°	0.996667	0.998	0.993355	0.230769	0.995008	0.993355	0.998999	0.23	0.231538	0.997333
pmd-rescaling	outbred	CEU	mapDamage2	0%	N/A	1.00X	TKGWV2	S	1	1	1	0.0769231	1	1	1	0.0769231	0.0769231	1
pmd-rescaling	outbred	CEU	mapDamage2	0%	N/A	1.00X	KIN	U	1	0.917	0.78329	0.230769	0.878477	0.78329	1	0.230769	0.294615	0.9585
pmd-rescaling	outbred	CEU	mapDamage2	0%	N/A	1.00X	KIN	3°	0.693333	0.983	0.924444	0.230769	0.792381	0.924444	0.914419	0.16	0.173077	0.838167
pmd-rescaling	outbred	CEU	mapDamage2	0%	N/A	1.00X	KIN	2°	0.943333	0.988	0.959322	0.230769	0.951261	0.959322	0.983085	0.217692	0.226923	0.965667
pmd-rescaling	outbred	CEU	mapDamage2	0%	N/A	1.00X	KIN	1°	0.99	0.999	0.996644	0.230769	0.993311	0.996644	0.997006	0.228462	0.229231	0.9945
pmd-rescaling	outbred	CEU	mapDamage2	0%	N/A	1.00X	KIN	S	0.99	1	1	0.0769231	0.994975	1	0.999167	0.0761538	0.0761538	0.995
pmd-rescaling	outbred	CEU	mapDamage2	0%	N/A	1.00X	READv2	U	1	0.998	0.993377	0.230769	0.996678	0.993377	1	0.230769	0.232308	0.999
pmd-rescaling	outbred	CEU	mapDamage2	0%	N/A	1.00X	READv2	3°	0.99	0.974	0.919505	0.230769	0.953451	0.919505	0.996929	0.228462	0.248462	0.982
pmd-rescaling	outbred	CEU	mapDamage2	0%	N/A	1.00X	READv2	2°	0.91	0.998	0.992727	0.230769	0.949565	0.992727	0.973659	0.21	0.211538	0.954
pmd-rescaling	outbred	CEU	mapDamage2	0%	N/A	1.00X	READv2	1°	0.996667	0.999	0.996667	0.230769	0.996667	0.996667	0.999	0.23	0.230769	0.997833
pmd-rescaling	outbred	CEU	mapDamage2	0%	N/A	1.00X	READv2	S	1	1	1	0.0769231	1	1	1	0.0769231	0.0769231	1
admixture	outbred	ASW	pmd-mask	0%	N/A	0.02X	correctKin	U	0.0733333	0.993	0.758621	0.230769	0.133739	0.758621	0.781275	0.0169231	0.0223077	0.533167
admixture	outbred	ASW	pmd-mask	0%	N/A	0.02X	correctKin	3°	0.01	0.962	0.0731707	0.230769	0.0175953	0.0731707	0.764098	0.00230769	0.0315385	0.486
admixture	outbred	ASW	pmd-mask	0%	N/A	0.02X	correctKin	2°	0.0633333	0.838	0.104972	0.230769	0.0790021	0.104972	0.748883	0.0146154	0.139231	0.450667
admixture	outbred	ASW	pmd-mask	0%	N/A	0.02X	correctKin	1°	0.283333	0.441	0.131988	0.230769	0.180085	0.131988	0.672256	0.0653846	0.495385	0.362167
admixture	outbred	ASW	pmd-mask	0%	N/A	0.02X	correctKin	S	1	0.745833	0.246914	0.0769231	0.39604	0.246914	1	0.0769231	0.311538	0.872917
admixture	outbred	ASW	pmd-mask	0%	N/A	0.02X	GRUPS	U	0.92	0.652	0.442308	0.230769	0.597403	0.442308	0.964497	0.212308	0.48	0.786
admixture	outbred	ASW	pmd-mask	0%	N/A	0.02X	GRUPS	3°	0.233333	0.845	0.311111	0.230769	0.266667	0.311111	0.786047	0.0538462	0.173077	0.539167
admixture	outbred	ASW	pmd-mask	0%	N/A	0.02X	GRUPS	2°	0.206667	0.832	0.269565	0.230769	0.233962	0.269565	0.77757	0.0476923	0.176923	0.519333
admixture	outbred	ASW	pmd-mask	0%	N/A	0.02X	GRUPS	1°	0.353333	0.961	0.731034	0.230769	0.476404	0.731034	0.832035	0.0815385	0.111538	0.657167
admixture	outbred	ASW	pmd-mask	0%	N/A	0.02X	GRUPS	S	0.74	0.998333	0.973684	0.0769231	0.840909	0.973684	0.978758	0.0569231	0.0584615	0.869167
admixture	outbred	ASW	pmd-mask	0%	N/A	0.02X	TKGWV2	U	0.5	0.915	0.638298	0.230769	0.560748	0.638298	0.859155	0.115385	0.180769	0.7075
admixture	outbred	ASW	pmd-mask	0%	N/A	0.02X	TKGWV2	3°	0	1	N/A	0.230769	N/A	N/A	0.769231	0	0	0.5
admixture	outbred	ASW	pmd-mask	0%	N/A	0.02X	TKGWV2	2°	0.523333	0.663	0.317814	0.230769	0.395466	0.317814	0.822581	0.120769	0.38	0.593167
admixture	outbred	ASW	pmd-mask	0%	N/A	0.02X	TKGWV2	1°	0.576667	0.823	0.494286	0.230769	0.532308	0.494286	0.866316	0.133077	0.269231	0.699833
admixture	outbred	ASW	pmd-mask	0%	N/A	0.02X	TKGWV2	S	1	0.899167	0.452489	0.0769231	0.623053	0.452489	1	0.0769231	0.17	0.949583
admixture	outbred	ASW	pmd-mask	0%	N/A	0.02X	KIN	U	0.923333	0.653	0.44391	0.230769	0.599567	0.44391	0.965976	0.213077	0.48	0.788167
admixture	outbred	ASW	pmd-mask	0%	N/A	0.02X	KIN	3°	0.18	0.9	0.350649	0.230769	0.237885	0.350649	0.78534	0.0415385	0.118462	0.54
admixture	outbred	ASW	pmd-mask	0%	N/A	0.02X	KIN	2°	0.28	0.85	0.358974	0.230769	0.314607	0.358974	0.797373	0.0646154	0.18	0.565
admixture	outbred	ASW	pmd-mask	0%	N/A	0.02X	KIN	1°	0.513333	0.953	0.766169	0.230769	0.61477	0.766169	0.867152	0.118462	0.154615	0.733167
admixture	outbred	ASW	pmd-mask	0%	N/A	0.02X	KIN	S	0.83	0.996667	0.954023	0.0769231	0.887701	0.954023	0.985985	0.0638462	0.0669231	0.913333
admixture	outbred	ASW	pmd-mask	0%	N/A	0.02X	READv2	U	0.966667	0.515	0.374194	0.230769	0.539535	0.374194	0.980952	0.223077	0.596154	0.740833
admixture	outbred	ASW	pmd-mask	0%	N/A	0.02X	READv2	3°	0	1	N/A	0.230769	N/A	N/A	0.769231	0	0	0.5
admixture	outbred	ASW	pmd-mask	0%	N/A	0.02X	READv2	2°	0.276667	0.844	0.34728	0.230769	0.307978	0.34728	0.795476	0.0638462	0.183846	0.560333
admixture	outbred	ASW	pmd-mask	0%	N/A	0.02X	READv2	1°	0.523333	0.959	0.792929	0.230769	0.630522	0.792929	0.870236	0.120769	0.152308	0.741167
admixture	outbred	ASW	pmd-mask	0%	N/A	0.02X	READv2	S	0.84	0.996667	0.954545	0.0769231	0.893617	0.954545	0.986799	0.0646154	0.0676923	0.918333
admixture	outbred	ASW	pmd-mask	0%	N/A	0.04X	correctKin	U	0.0233333	1	1	0.230769	0.0456026	1	0.773395	0.00538462	0.00538462	0.511667
admixture	outbred	ASW	pmd-mask	0%	N/A	0.04X	correctKin	3°	0.00666667	0.981	0.0952381	0.230769	0.0124611	0.0952381	0.767005	0.00153846	0.0161538	0.493833
admixture	outbred	ASW	pmd-mask	0%	N/A	0.04X	correctKin	2°	0.0366667	0.825	0.0591398	0.230769	0.0452675	0.0591398	0.740575	0.00846154	0.143077	0.430833
admixture	outbred	ASW	pmd-mask	0%	N/A	0.04X	correctKin	1°	0.206667	0.342	0.0861111	0.230769	0.121569	0.0861111	0.589655	0.0476923	0.553846	0.274333
admixture	outbred	ASW	pmd-mask	0%	N/A	0.04X	correctKin	S	1	0.778333	0.273224	0.0769231	0.429185	0.273224	1	0.0769231	0.281538	0.889167
admixture	outbred	ASW	pmd-mask	0%	N/A	0.04X	GRUPS	U	0.996667	0.583	0.417598	0.230769	0.588583	0.417598	0.998288	0.23	0.550769	0.789833
admixture	outbred	ASW	pmd-mask	0%	N/A	0.04X	GRUPS	3°	0.0933333	0.848	0.155556	0.230769	0.116667	0.155556	0.757143	0.0215385	0.138462	0.470667
admixture	outbred	ASW	pmd-mask	0%	N/A	0.04X	GRUPS	2°	0.0633333	0.807	0.0896226	0.230769	0.0742188	0.0896226	0.741728	0.0146154	0.163077	0.435167
admixture	outbred	ASW	pmd-mask	0%	N/A	0.04X	GRUPS	1°	0.306667	0.982	0.836364	0.230769	0.44878	0.836364	0.82521	0.0707692	0.0846154	0.644333
admixture	outbred	ASW	pmd-mask	0%	N/A	0.04X	GRUPS	S	0.82	1	1	0.0769231	0.901099	1	0.985222	0.0630769	0.0630769	0.91
admixture	outbred	ASW	pmd-mask	0%	N/A	0.04X	TKGWV2	U	0.506667	0.968	0.826087	0.230769	0.628099	0.826087	0.867384	0.116923	0.141538	0.737333
admixture	outbred	ASW	pmd-mask	0%	N/A	0.04X	TKGWV2	3°	0	1	N/A	0.230769	N/A	N/A	0.769231	0	0	0.5
admixture	outbred	ASW	pmd-mask	0%	N/A	0.04X	TKGWV2	2°	0.583333	0.594	0.301205	0.230769	0.397276	0.301205	0.826147	0.134615	0.446923	0.588667
admixture	outbred	ASW	pmd-mask	0%	N/A	0.04X	TKGWV2	1°	0.676667	0.863	0.597059	0.230769	0.634375	0.597059	0.898958	0.156154	0.261538	0.769833
admixture	outbred	ASW	pmd-mask	0%	N/A	0.04X	TKGWV2	S	1	0.920833	0.512821	0.0769231	0.677966	0.512821	1	0.0769231	0.15	0.960417
admixture	outbred	ASW	pmd-mask	0%	N/A	0.04X	KIN	U	0.98	0.708	0.501706	0.230769	0.663657	0.501706	0.991597	0.226154	0.450769	0.844
admixture	outbred	ASW	pmd-mask	0%	N/A	0.04X	KIN	3°	0.22	0.884	0.362637	0.230769	0.273859	0.362637	0.790698	0.0507692	0.14	0.552
admixture	outbred	ASW	pmd-mask	0%	N/A	0.04X	KIN	2°	0.386667	0.893	0.520179	0.230769	0.443595	0.520179	0.829155	0.0892308	0.171538	0.639833
admixture	outbred	ASW	pmd-mask	0%	N/A	0.04X	KIN	1°	0.696667	0.999	0.995238	0.230769	0.819608	0.995238	0.916514	0.160769	0.161538	0.847833
admixture	outbred	ASW	pmd-mask	0%	N/A	0.04X	KIN	S	0.99	1	1	0.0769231	0.994975	1	0.999167	0.0761538	0.0761538	0.995
admixture	outbred	ASW	pmd-mask	0%	N/A	0.04X	READv2	U	0.996667	0.534	0.39085	0.230769	0.561502	0.39085	0.998131	0.23	0.588462	0.765333
admixture	outbred	ASW	pmd-mask	0%	N/A	0.04X	READv2	3°	0	1	N/A	0.230769	N/A	N/A	0.769231	0	0	0.5
admixture	outbred	ASW	pmd-mask	0%	N/A	0.04X	READv2	2°	0.393333	0.885	0.506438	0.230769	0.442777	0.506438	0.829428	0.0907692	0.179231	0.639167
admixture	outbred	ASW	pmd-mask	0%	N/A	0.04X	READv2	1°	0.673333	0.999	0.995074	0.230769	0.803181	0.995074	0.910665	0.155385	0.156154	0.836167
admixture	outbred	ASW	pmd-mask	0%	N/A	0.04X	READv2	S	0.99	1	1	0.0769231	0.994975	1	0.999167	0.0761538	0.0761538	0.995
admixture	outbred	ASW	pmd-mask	0%	N/A	0.06X	correctKin	U	0.01	1	1	0.230769	0.019802	1	0.77101	0.00230769	0.00230769	0.505
admixture	outbred	ASW	pmd-mask	0%	N/A	0.06X	correctKin	3°	0	0.99	0	0.230769	N/A	0	0.767442	0	0.00769231	0.495
admixture	outbred	ASW	pmd-mask	0%	N/A	0.06X	correctKin	2°	0.0133333	0.823	0.0220994	0.230769	0.016632	0.0220994	0.735478	0.00307692	0.139231	0.418167
admixture	outbred	ASW	pmd-mask	0%	N/A	0.06X	correctKin	1°	0.133333	0.313	0.0550206	0.230769	0.0778968	0.0550206	0.546248	0.0307692	0.559231	0.223167
admixture	outbred	ASW	pmd-mask	0%	N/A	0.06X	correctKin	S	1	0.7675	0.263852	0.0769231	0.417537	0.263852	1	0.0769231	0.291538	0.88375
admixture	outbred	ASW	pmd-mask	0%	N/A	0.06X	GRUPS	U	1	0.561	0.405954	0.230769	0.577478	0.405954	1	0.230769	0.568462	0.7805
admixture	outbred	ASW	pmd-mask	0%	N/A	0.06X	GRUPS	3°	0.04	0.858	0.0779221	0.230769	0.0528634	0.0779221	0.748691	0.00923077	0.118462	0.449
admixture	outbred	ASW	pmd-mask	0%	N/A	0.06X	GRUPS	2°	0.04	0.782	0.0521739	0.230769	0.045283	0.0521739	0.730841	0.00923077	0.176923	0.411
admixture	outbred	ASW	pmd-mask	0%	N/A	0.06X	GRUPS	1°	0.256667	0.997	0.9625	0.230769	0.405263	0.9625	0.817213	0.0592308	0.0615385	0.626833
admixture	outbred	ASW	pmd-mask	0%	N/A	0.06X	GRUPS	S	0.97	1	1	0.0769231	0.984772	1	0.997506	0.0746154	0.0746154	0.985
admixture	outbred	ASW	pmd-mask	0%	N/A	0.06X	TKGWV2	U	0.45	0.978	0.859873	0.230769	0.59081	0.859873	0.855643	0.103846	0.120769	0.714
admixture	outbred	ASW	pmd-mask	0%	N/A	0.06X	TKGWV2	3°	0	1	N/A	0.230769	N/A	N/A	0.769231	0	0	0.5
admixture	outbred	ASW	pmd-mask	0%	N/A	0.06X	TKGWV2	2°	0.61	0.559	0.293269	0.230769	0.396104	0.293269	0.826923	0.140769	0.48	0.5845
admixture	outbred	ASW	pmd-mask	0%	N/A	0.06X	TKGWV2	1°	0.723333	0.88	0.643917	0.230769	0.681319	0.643917	0.913811	0.166923	0.259231	0.801667
admixture	outbred	ASW	pmd-mask	0%	N/A	0.06X	TKGWV2	S	1	0.931667	0.549451	0.0769231	0.70922	0.549451	1	0.0769231	0.14	0.965833
admixture	outbred	ASW	pmd-mask	0%	N/A	0.06X	KIN	U	0.993333	0.737	0.531194	0.230769	0.692218	0.531194	0.997294	0.229231	0.431538	0.865167
admixture	outbred	ASW	pmd-mask	0%	N/A	0.06X	KIN	3°	0.213333	0.882	0.351648	0.230769	0.26556	0.351648	0.788909	0.0492308	0.14	0.547667
admixture	outbred	ASW	pmd-mask	0%	N/A	0.06X	KIN	2°	0.496667	0.943	0.723301	0.230769	0.588933	0.723301	0.861974	0.114615	0.158462	0.719833
admixture	outbred	ASW	pmd-mask	0%	N/A	0.06X	KIN	1°	0.833333	0.999	0.996016	0.230769	0.907441	0.996016	0.952336	0.192308	0.193077	0.916167
admixture	outbred	ASW	pmd-mask	0%	N/A	0.06X	KIN	S	1	1	1	0.0769231	1	1	1	0.0769231	0.0769231	1
admixture	outbred	ASW	pmd-mask	0%	N/A	0.06X	READv2	U	1	0.546	0.397878	0.230769	0.56926	0.397878	1	0.230769	0.58	0.773
admixture	outbred	ASW	pmd-mask	0%	N/A	0.06X	READv2	3°	0	1	N/A	0.230769	N/A	N/A	0.769231	0	0	0.5
admixture	outbred	ASW	pmd-mask	0%	N/A	0.06X	READv2	2°	0.463333	0.948	0.727749	0.230769	0.566191	0.727749	0.854824	0.106923	0.146923	0.705667
admixture	outbred	ASW	pmd-mask	0%	N/A	0.06X	READv2	1°	0.846667	0.999	0.996078	0.230769	0.915315	0.996078	0.955981	0.195385	0.196154	0.922833
admixture	outbred	ASW	pmd-mask	0%	N/A	0.06X	READv2	S	1	1	1	0.0769231	1	1	1	0.0769231	0.0769231	1
admixture	outbred	ASW	pmd-mask	0%	N/A	0.08X	correctKin	U	0.00666667	1	1	0.230769	0.013245	1	0.770416	0.00153846	0.00153846	0.503333
admixture	outbred	ASW	pmd-mask	0%	N/A	0.08X	correctKin	3°	0.00333333	0.991	0.1	0.230769	0.00645161	0.1	0.768217	0.000769231	0.00769231	0.497167
admixture	outbred	ASW	pmd-mask	0%	N/A	0.08X	correctKin	2°	0.01	0.841	0.0185185	0.230769	0.012987	0.0185185	0.739016	0.00230769	0.124615	0.4255
admixture	outbred	ASW	pmd-mask	0%	N/A	0.08X	correctKin	1°	0.136667	0.289	0.0545213	0.230769	0.0779468	0.0545213	0.527372	0.0315385	0.578462	0.212833
admixture	outbred	ASW	pmd-mask	0%	N/A	0.08X	correctKin	S	1	0.771667	0.26738	0.0769231	0.421941	0.26738	1	0.0769231	0.287692	0.885833
admixture	outbred	ASW	pmd-mask	0%	N/A	0.08X	GRUPS	U	1	0.574	0.413223	0.230769	0.584795	0.413223	1	0.230769	0.558462	0.787
admixture	outbred	ASW	pmd-mask	0%	N/A	0.08X	GRUPS	3°	0.0133333	0.841	0.0245399	0.230769	0.0172786	0.0245399	0.739666	0.00307692	0.125385	0.427167
admixture	outbred	ASW	pmd-mask	0%	N/A	0.08X	GRUPS	2°	0.04	0.783	0.0524017	0.230769	0.0453686	0.0524017	0.731092	0.00923077	0.176154	0.4115
admixture	outbred	ASW	pmd-mask	0%	N/A	0.08X	GRUPS	1°	0.273333	0.996	0.953488	0.230769	0.42487	0.953488	0.820428	0.0630769	0.0661538	0.634667
admixture	outbred	ASW	pmd-mask	0%	N/A	0.08X	GRUPS	S	0.96	1	1	0.0769231	0.979592	1	0.996678	0.0738462	0.0738462	0.98
admixture	outbred	ASW	pmd-mask	0%	N/A	0.08X	TKGWV2	U	0.46	0.99	0.932432	0.230769	0.616071	0.932432	0.859375	0.106154	0.113846	0.725
admixture	outbred	ASW	pmd-mask	0%	N/A	0.08X	TKGWV2	3°	0	1	N/A	0.230769	N/A	N/A	0.769231	0	0	0.5
admixture	outbred	ASW	pmd-mask	0%	N/A	0.08X	TKGWV2	2°	0.596667	0.551	0.285032	0.230769	0.385776	0.285032	0.81994	0.137692	0.483077	0.573833
admixture	outbred	ASW	pmd-mask	0%	N/A	0.08X	TKGWV2	1°	0.723333	0.876	0.636364	0.230769	0.677067	0.636364	0.913452	0.166923	0.262308	0.799667
admixture	outbred	ASW	pmd-mask	0%	N/A	0.08X	TKGWV2	S	1	0.930833	0.546448	0.0769231	0.706714	0.546448	1	0.0769231	0.140769	0.965417
admixture	outbred	ASW	pmd-mask	0%	N/A	0.08X	KIN	U	1	0.771	0.567108	0.230769	0.723764	0.567108	1	0.230769	0.406923	0.8855
admixture	outbred	ASW	pmd-mask	0%	N/A	0.08X	KIN	3°	0.273333	0.896	0.44086	0.230769	0.337449	0.44086	0.804309	0.0630769	0.143077	0.584667
admixture	outbred	ASW	pmd-mask	0%	N/A	0.08X	KIN	2°	0.603333	0.972	0.866029	0.230769	0.711198	0.866029	0.890926	0.139231	0.160769	0.787667
admixture	outbred	ASW	pmd-mask	0%	N/A	0.08X	KIN	1°	0.92	1	1	0.230769	0.958333	1	0.976562	0.212308	0.212308	0.96
admixture	outbred	ASW	pmd-mask	0%	N/A	0.08X	KIN	S	1	1	1	0.0769231	1	1	1	0.0769231	0.0769231	1
admixture	outbred	ASW	pmd-mask	0%	N/A	0.08X	READv2	U	1	0.577	0.414938	0.230769	0.58651	0.414938	1	0.230769	0.556154	0.7885
admixture	outbred	ASW	pmd-mask	0%	N/A	0.08X	READv2	3°	0	1	N/A	0.230769	N/A	N/A	0.769231	0	0	0.5
admixture	outbred	ASW	pmd-mask	0%	N/A	0.08X	READv2	2°	0.58	0.977	0.883249	0.230769	0.700201	0.883249	0.885766	0.133846	0.151538	0.7785
admixture	outbred	ASW	pmd-mask	0%	N/A	0.08X	READv2	1°	0.933333	1	1	0.230769	0.965517	1	0.980392	0.215385	0.215385	0.966667
admixture	outbred	ASW	pmd-mask	0%	N/A	0.08X	READv2	S	1	1	1	0.0769231	1	1	1	0.0769231	0.0769231	1
admixture	outbred	ASW	pmd-mask	0%	N/A	0.10X	correctKin	U	0.02	1	1	0.230769	0.0392157	1	0.772798	0.00461538	0.00461538	0.51
admixture	outbred	ASW	pmd-mask	0%	N/A	0.10X	correctKin	3°	0	0.994	0	0.230769	N/A	0	0.768161	0	0.00461538	0.497
admixture	outbred	ASW	pmd-mask	0%	N/A	0.10X	correctKin	2°	0.01	0.83	0.017341	0.230769	0.012685	0.017341	0.736469	0.00230769	0.133077	0.42
admixture	outbred	ASW	pmd-mask	0%	N/A	0.10X	correctKin	1°	0.176667	0.3	0.0703851	0.230769	0.100665	0.0703851	0.548446	0.0407692	0.579231	0.238333
admixture	outbred	ASW	pmd-mask	0%	N/A	0.10X	correctKin	S	1	0.781667	0.276243	0.0769231	0.4329	0.276243	1	0.0769231	0.278462	0.890833
admixture	outbred	ASW	pmd-mask	0%	N/A	0.10X	GRUPS	U	0.993333	0.558	0.402703	0.230769	0.573077	0.402703	0.996429	0.229231	0.569231	0.775667
admixture	outbred	ASW	pmd-mask	0%	N/A	0.10X	GRUPS	3°	0.00666667	0.849	0.0130719	0.230769	0.00883002	0.0130719	0.740192	0.00153846	0.117692	0.427833
admixture	outbred	ASW	pmd-mask	0%	N/A	0.10X	GRUPS	2°	0.0266667	0.75	0.0310078	0.230769	0.0286738	0.0310078	0.71977	0.00615385	0.198462	0.388333
admixture	outbred	ASW	pmd-mask	0%	N/A	0.10X	GRUPS	1°	0.16	0.999	0.979592	0.230769	0.275072	0.979592	0.798561	0.0369231	0.0376923	0.5795
admixture	outbred	ASW	pmd-mask	0%	N/A	0.10X	GRUPS	S	1	1	1	0.0769231	1	1	1	0.0769231	0.0769231	1
admixture	outbred	ASW	pmd-mask	0%	N/A	0.10X	TKGWV2	U	0.496667	0.983	0.89759	0.230769	0.639485	0.89759	0.866843	0.114615	0.127692	0.739833
admixture	outbred	ASW	pmd-mask	0%	N/A	0.10X	TKGWV2	3°	0	1	N/A	0.230769	N/A	N/A	0.769231	0	0	0.5
admixture	outbred	ASW	pmd-mask	0%	N/A	0.10X	TKGWV2	2°	0.596667	0.564	0.291057	0.230769	0.391257	0.291057	0.823358	0.137692	0.473077	0.580333
admixture	outbred	ASW	pmd-mask	0%	N/A	0.10X	TKGWV2	1°	0.79	0.881	0.66573	0.230769	0.722561	0.66573	0.933263	0.182308	0.273846	0.8355
admixture	outbred	ASW	pmd-mask	0%	N/A	0.10X	TKGWV2	S	1	0.9475	0.613497	0.0769231	0.760456	0.613497	1	0.0769231	0.125385	0.97375
admixture	outbred	ASW	pmd-mask	0%	N/A	0.10X	KIN	U	1	0.769	0.564972	0.230769	0.722022	0.564972	1	0.230769	0.408462	0.8845
admixture	outbred	ASW	pmd-mask	0%	N/A	0.10X	KIN	3°	0.25	0.891	0.407609	0.230769	0.309917	0.407609	0.798387	0.0576923	0.141538	0.5705
admixture	outbred	ASW	pmd-mask	0%	N/A	0.10X	KIN	2°	0.603333	0.968	0.849765	0.230769	0.705653	0.849765	0.890524	0.139231	0.163846	0.785667
admixture	outbred	ASW	pmd-mask	0%	N/A	0.10X	KIN	1°	0.903333	0.999	0.996324	0.230769	0.947552	0.996324	0.97179	0.208462	0.209231	0.951167
admixture	outbred	ASW	pmd-mask	0%	N/A	0.10X	KIN	S	1	1	1	0.0769231	1	1	1	0.0769231	0.0769231	1
admixture	outbred	ASW	pmd-mask	0%	N/A	0.10X	READv2	U	1	0.578	0.415512	0.230769	0.587084	0.415512	1	0.230769	0.555385	0.789
admixture	outbred	ASW	pmd-mask	0%	N/A	0.10X	READv2	3°	0	1	N/A	0.230769	N/A	N/A	0.769231	0	0	0.5
admixture	outbred	ASW	pmd-mask	0%	N/A	0.10X	READv2	2°	0.58	0.978	0.887755	0.230769	0.701613	0.887755	0.88587	0.133846	0.150769	0.779
admixture	outbred	ASW	pmd-mask	0%	N/A	0.10X	READv2	1°	0.93	0.998	0.992883	0.230769	0.960413	0.992883	0.979392	0.214615	0.216154	0.964
admixture	outbred	ASW	pmd-mask	0%	N/A	0.10X	READv2	S	1	0.999167	0.990099	0.0769231	0.995025	0.990099	1	0.0769231	0.0776923	0.999583
admixture	outbred	ASW	pmd-mask	0%	N/A	0.20X	correctKin	U	0.0133333	1	1	0.230769	0.0263158	1	0.771605	0.00307692	0.00307692	0.506667
admixture	outbred	ASW	pmd-mask	0%	N/A	0.20X	correctKin	3°	0	0.994	0	0.230769	N/A	0	0.768161	0	0.00461538	0.497
admixture	outbred	ASW	pmd-mask	0%	N/A	0.20X	correctKin	2°	0.00666667	0.843	0.0125786	0.230769	0.0087146	0.0125786	0.738826	0.00153846	0.122308	0.424833
admixture	outbred	ASW	pmd-mask	0%	N/A	0.20X	correctKin	1°	0.0766667	0.273	0.0306667	0.230769	0.0438095	0.0306667	0.496364	0.0176923	0.576923	0.174833
admixture	outbred	ASW	pmd-mask	0%	N/A	0.20X	correctKin	S	1	0.765833	0.262467	0.0769231	0.4158	0.262467	1	0.0769231	0.293077	0.882917
admixture	outbred	ASW	pmd-mask	0%	N/A	0.20X	GRUPS	U	1	0.586	0.420168	0.230769	0.591716	0.420168	1	0.230769	0.549231	0.793
admixture	outbred	ASW	pmd-mask	0%	N/A	0.20X	GRUPS	3°	0.00666667	0.819	0.010929	0.230769	0.00828157	0.010929	0.733214	0.00153846	0.140769	0.412833
admixture	outbred	ASW	pmd-mask	0%	N/A	0.20X	GRUPS	2°	0.01	0.755	0.0120968	0.230769	0.0109489	0.0120968	0.717681	0.00230769	0.190769	0.3825
admixture	outbred	ASW	pmd-mask	0%	N/A	0.20X	GRUPS	1°	0.183333	0.999	0.982143	0.230769	0.308989	0.982143	0.803055	0.0423077	0.0430769	0.591167
admixture	outbred	ASW	pmd-mask	0%	N/A	0.20X	GRUPS	S	0.99	1	1	0.0769231	0.994975	1	0.999167	0.0761538	0.0761538	0.995
admixture	outbred	ASW	pmd-mask	0%	N/A	0.20X	TKGWV2	U	0.426667	0.995	0.962406	0.230769	0.591224	0.962406	0.852614	0.0984615	0.102308	0.710833
admixture	outbred	ASW	pmd-mask	0%	N/A	0.20X	TKGWV2	3°	0	1	N/A	0.230769	N/A	N/A	0.769231	0	0	0.5
admixture	outbred	ASW	pmd-mask	0%	N/A	0.20X	TKGWV2	2°	0.623333	0.535	0.28681	0.230769	0.392857	0.28681	0.825617	0.143846	0.501538	0.579167
admixture	outbred	ASW	pmd-mask	0%	N/A	0.20X	TKGWV2	1°	0.74	0.885	0.658754	0.230769	0.697017	0.658754	0.919003	0.170769	0.259231	0.8125
admixture	outbred	ASW	pmd-mask	0%	N/A	0.20X	TKGWV2	S	1	0.935	0.561798	0.0769231	0.719424	0.561798	1	0.0769231	0.136923	0.9675
admixture	outbred	ASW	pmd-mask	0%	N/A	0.20X	KIN	U	1	0.833	0.642398	0.230769	0.782269	0.642398	1	0.230769	0.359231	0.9165
admixture	outbred	ASW	pmd-mask	0%	N/A	0.20X	KIN	3°	0.44	0.956	0.75	0.230769	0.554622	0.75	0.850534	0.101538	0.135385	0.698
admixture	outbred	ASW	pmd-mask	0%	N/A	0.20X	KIN	2°	0.853333	0.996	0.984615	0.230769	0.914286	0.984615	0.957692	0.196923	0.2	0.924667
admixture	outbred	ASW	pmd-mask	0%	N/A	0.20X	KIN	1°	0.99	1	1	0.230769	0.994975	1	0.997009	0.228462	0.228462	0.995
admixture	outbred	ASW	pmd-mask	0%	N/A	0.20X	KIN	S	1	1	1	0.0769231	1	1	1	0.0769231	0.0769231	1
admixture	outbred	ASW	pmd-mask	0%	N/A	0.20X	READv2	U	1	0.943	0.840336	0.230769	0.913242	0.840336	1	0.230769	0.274615	0.9715
admixture	outbred	ASW	pmd-mask	0%	N/A	0.20X	READv2	3°	0.806667	0.938	0.796053	0.230769	0.801325	0.796053	0.941767	0.186154	0.233846	0.872333
admixture	outbred	ASW	pmd-mask	0%	N/A	0.20X	READv2	2°	0.793333	0.999	0.995816	0.230769	0.883117	0.995816	0.941565	0.183077	0.183846	0.896167
admixture	outbred	ASW	pmd-mask	0%	N/A	0.20X	READv2	1°	1	1	1	0.230769	1	1	1	0.230769	0.230769	1
admixture	outbred	ASW	pmd-mask	0%	N/A	0.20X	READv2	S	1	1	1	0.0769231	1	1	1	0.0769231	0.0769231	1
admixture	outbred	ASW	pmd-mask	0%	N/A	0.50X	correctKin	U	0.01	1	1	0.230769	0.019802	1	0.77101	0.00230769	0.00230769	0.505
admixture	outbred	ASW	pmd-mask	0%	N/A	0.50X	correctKin	3°	0	0.999	0	0.230769	N/A	0	0.769053	0	0.000769231	0.4995
admixture	outbred	ASW	pmd-mask	0%	N/A	0.50X	correctKin	2°	0.00333333	0.732	0.00371747	0.230769	0.00351494	0.00371747	0.70999	0.000769231	0.206923	0.367667
admixture	outbred	ASW	pmd-mask	0%	N/A	0.50X	correctKin	1°	0.166667	0.373	0.0738552	0.230769	0.102354	0.0738552	0.598716	0.0384615	0.520769	0.269833
admixture	outbred	ASW	pmd-mask	0%	N/A	0.50X	correctKin	S	1	0.791667	0.285714	0.0769231	0.444444	0.285714	1	0.0769231	0.269231	0.895833
admixture	outbred	ASW	pmd-mask	0%	N/A	0.50X	GRUPS	U	0.996667	0.591	0.422316	0.230769	0.593254	0.422316	0.998311	0.23	0.544615	0.793833
admixture	outbred	ASW	pmd-mask	0%	N/A	0.50X	GRUPS	3°	0.00333333	0.81	0.0052356	0.230769	0.00407332	0.0052356	0.730388	0.000769231	0.146923	0.406667
admixture	outbred	ASW	pmd-mask	0%	N/A	0.50X	GRUPS	2°	0.00333333	0.739	0.00381679	0.230769	0.00355872	0.00381679	0.711946	0.000769231	0.201538	0.371167
admixture	outbred	ASW	pmd-mask	0%	N/A	0.50X	GRUPS	1°	0.13	1	1	0.230769	0.230088	1	0.793021	0.03	0.03	0.565
admixture	outbred	ASW	pmd-mask	0%	N/A	0.50X	GRUPS	S	1	1	1	0.0769231	1	1	1	0.0769231	0.0769231	1
admixture	outbred	ASW	pmd-mask	0%	N/A	0.50X	TKGWV2	U	0.423333	0.996	0.969466	0.230769	0.589327	0.969466	0.85201	0.0976923	0.100769	0.709667
admixture	outbred	ASW	pmd-mask	0%	N/A	0.50X	TKGWV2	3°	0	1	N/A	0.230769	N/A	N/A	0.769231	0	0	0.5
admixture	outbred	ASW	pmd-mask	0%	N/A	0.50X	TKGWV2	2°	0.626667	0.53	0.285714	0.230769	0.392484	0.285714	0.825545	0.144615	0.506154	0.578333
admixture	outbred	ASW	pmd-mask	0%	N/A	0.50X	TKGWV2	1°	0.786667	0.889	0.680115	0.230769	0.729521	0.680115	0.932844	0.181538	0.266923	0.837833
admixture	outbred	ASW	pmd-mask	0%	N/A	0.50X	TKGWV2	S	1	0.946667	0.609756	0.0769231	0.757576	0.609756	1	0.0769231	0.126154	0.973333
admixture	outbred	ASW	pmd-mask	0%	N/A	0.50X	KIN	U	0.996667	0.847	0.661504	0.230769	0.795213	0.661504	0.998821	0.23	0.347692	0.921833
admixture	outbred	ASW	pmd-mask	0%	N/A	0.50X	KIN	3°	0.48	0.967	0.813559	0.230769	0.603774	0.813559	0.861086	0.110769	0.136154	0.7235
admixture	outbred	ASW	pmd-mask	0%	N/A	0.50X	KIN	2°	0.89	0.994	0.978022	0.230769	0.931937	0.978022	0.967868	0.205385	0.21	0.942
admixture	outbred	ASW	pmd-mask	0%	N/A	0.50X	KIN	1°	0.993333	1	1	0.230769	0.996656	1	0.998004	0.229231	0.229231	0.996667
admixture	outbred	ASW	pmd-mask	0%	N/A	0.50X	KIN	S	1	1	1	0.0769231	1	1	1	0.0769231	0.0769231	1
admixture	outbred	ASW	pmd-mask	0%	N/A	0.50X	READv2	U	0.996667	0.956	0.87172	0.230769	0.930016	0.87172	0.998955	0.23	0.263846	0.976333
admixture	outbred	ASW	pmd-mask	0%	N/A	0.50X	READv2	3°	0.85	0.947	0.827922	0.230769	0.838816	0.827922	0.954637	0.196154	0.236923	0.8985
admixture	outbred	ASW	pmd-mask	0%	N/A	0.50X	READv2	2°	0.826667	0.998	0.992	0.230769	0.901818	0.992	0.950476	0.190769	0.192308	0.912333
admixture	outbred	ASW	pmd-mask	0%	N/A	0.50X	READv2	1°	0.996667	1	1	0.230769	0.998331	1	0.999001	0.23	0.23	0.998333
admixture	outbred	ASW	pmd-mask	0%	N/A	0.50X	READv2	S	1	1	1	0.0769231	1	1	1	0.0769231	0.0769231	1
admixture	outbred	ASW	pmd-mask	0%	N/A	1.00X	correctKin	U	0.973333	0.159	0.257723	0.230769	0.407537	0.257723	0.952096	0.224615	0.871538	0.566167
admixture	outbred	ASW	pmd-mask	0%	N/A	1.00X	correctKin	3°	0.00333333	0.999	0.5	0.230769	0.00662252	0.5	0.769646	0.000769231	0.00153846	0.501167
admixture	outbred	ASW	pmd-mask	0%	N/A	1.00X	correctKin	2°	0.133333	0.973	0.597015	0.230769	0.217984	0.597015	0.789132	0.0307692	0.0515385	0.553167
admixture	outbred	ASW	pmd-mask	0%	N/A	1.00X	correctKin	1°	0.2	0.985	0.8	0.230769	0.32	0.8	0.804082	0.0461538	0.0576923	0.5925
admixture	outbred	ASW	pmd-mask	0%	N/A	1.00X	correctKin	S	0.23	1	1	0.0769231	0.373984	1	0.939702	0.0176923	0.0176923	0.615
admixture	outbred	ASW	pmd-mask	0%	N/A	1.00X	GRUPS	U	0.996667	0.599	0.427143	0.230769	0.598	0.427143	0.998333	0.23	0.538462	0.797833
admixture	outbred	ASW	pmd-mask	0%	N/A	1.00X	GRUPS	3°	0.00666667	0.805	0.0101523	0.230769	0.00804829	0.0101523	0.729828	0.00153846	0.151538	0.405833
admixture	outbred	ASW	pmd-mask	0%	N/A	1.00X	GRUPS	2°	0.01	0.751	0.0119048	0.230769	0.0108696	0.0119048	0.716603	0.00230769	0.193846	0.3805
admixture	outbred	ASW	pmd-mask	0%	N/A	1.00X	GRUPS	1°	0.17	1	1	0.230769	0.290598	1	0.800641	0.0392308	0.0392308	0.585
admixture	outbred	ASW	pmd-mask	0%	N/A	1.00X	GRUPS	S	1	1	1	0.0769231	1	1	1	0.0769231	0.0769231	1
admixture	outbred	ASW	pmd-mask	0%	N/A	1.00X	TKGWV2	U	0.41	0.993	0.946154	0.230769	0.572093	0.946154	0.848718	0.0946154	0.1	0.7015
admixture	outbred	ASW	pmd-mask	0%	N/A	1.00X	TKGWV2	3°	0	1	N/A	0.230769	N/A	N/A	0.769231	0	0	0.5
admixture	outbred	ASW	pmd-mask	0%	N/A	1.00X	TKGWV2	2°	0.606667	0.53	0.279141	0.230769	0.382353	0.279141	0.817901	0.14	0.501538	0.568333
admixture	outbred	ASW	pmd-mask	0%	N/A	1.00X	TKGWV2	1°	0.773333	0.882	0.662857	0.230769	0.713846	0.662857	0.928421	0.178462	0.269231	0.827667
admixture	outbred	ASW	pmd-mask	0%	N/A	1.00X	TKGWV2	S	1	0.943333	0.595238	0.0769231	0.746269	0.595238	1	0.0769231	0.129231	0.971667
admixture	outbred	ASW	pmd-mask	0%	N/A	1.00X	KIN	U	1	0.898	0.746269	0.230769	0.854701	0.746269	1	0.230769	0.309231	0.949
admixture	outbred	ASW	pmd-mask	0%	N/A	1.00X	KIN	3°	0.64	0.985	0.927536	0.230769	0.757396	0.927536	0.901189	0.147692	0.159231	0.8125
admixture	outbred	ASW	pmd-mask	0%	N/A	1.00X	KIN	2°	0.936667	0.989	0.962329	0.230769	0.949324	0.962329	0.981151	0.216154	0.224615	0.962833
admixture	outbred	ASW	pmd-mask	0%	N/A	1.00X	KIN	1°	0.996667	1	1	0.230769	0.998331	1	0.999001	0.23	0.23	0.998333
admixture	outbred	ASW	pmd-mask	0%	N/A	1.00X	KIN	S	1	1	1	0.0769231	1	1	1	0.0769231	0.0769231	1
admixture	outbred	ASW	pmd-mask	0%	N/A	1.00X	READv2	U	0.996667	0.964	0.892537	0.230769	0.941732	0.892537	0.998964	0.23	0.257692	0.980333
admixture	outbred	ASW	pmd-mask	0%	N/A	1.00X	READv2	3°	0.886667	0.96	0.869281	0.230769	0.877888	0.869281	0.965795	0.204615	0.235385	0.923333
admixture	outbred	ASW	pmd-mask	0%	N/A	1.00X	READv2	2°	0.86	0.993	0.973585	0.230769	0.913274	0.973585	0.95942	0.198462	0.203846	0.9265
admixture	outbred	ASW	pmd-mask	0%	N/A	1.00X	READv2	1°	0.98	1	1	0.230769	0.989899	1	0.994036	0.226154	0.226154	0.99
admixture	outbred	ASW	pmd-mask	0%	N/A	1.00X	READv2	S	1	1	1	0.0769231	1	1	1	0.0769231	0.0769231	1
admixture	outbred	PUR	pmd-mask	0%	N/A	0.10X	correctKin	U	0.97	0.979	0.932692	0.230769	0.95098	0.932692	0.990891	0.223846	0.24	0.9745
admixture	outbred	PUR	pmd-mask	0%	N/A	0.10X	correctKin	3°	0.7	0.988	0.945946	0.230769	0.804598	0.945946	0.916512	0.161538	0.170769	0.844
admixture	outbred	PUR	pmd-mask	0%	N/A	0.10X	correctKin	2°	0.973333	0.931	0.808864	0.230769	0.88351	0.808864	0.99148	0.224615	0.277692	0.952167
admixture	outbred	PUR	pmd-mask	0%	N/A	0.10X	correctKin	1°	1	0.995	0.983607	0.230769	0.991736	0.983607	1	0.230769	0.234615	0.9975
admixture	outbred	PUR	pmd-mask	0%	N/A	0.10X	correctKin	S	1	1	1	0.0769231	1	1	1	0.0769231	0.0769231	1
admixture	outbred	PUR	pmd-mask	0%	N/A	0.10X	GRUPS	U	1	0.73	0.526316	0.230769	0.689655	0.526316	1	0.230769	0.438462	0.865
admixture	outbred	PUR	pmd-mask	0%	N/A	0.10X	GRUPS	3°	0.163333	0.77	0.175627	0.230769	0.169257	0.175627	0.754163	0.0376923	0.214615	0.466667
admixture	outbred	PUR	pmd-mask	0%	N/A	0.10X	GRUPS	2°	0.17	0.943	0.472222	0.230769	0.25	0.472222	0.791107	0.0392308	0.0830769	0.5565
admixture	outbred	PUR	pmd-mask	0%	N/A	0.10X	GRUPS	1°	0.81	1	1	0.230769	0.895028	1	0.946074	0.186923	0.186923	0.905
admixture	outbred	PUR	pmd-mask	0%	N/A	0.10X	GRUPS	S	1	1	1	0.0769231	1	1	1	0.0769231	0.0769231	1
admixture	outbred	PUR	pmd-mask	0%	N/A	0.10X	TKGWV2	U	1	0.768	0.56391	0.230769	0.721154	0.56391	1	0.230769	0.409231	0.884
admixture	outbred	PUR	pmd-mask	0%	N/A	0.10X	TKGWV2	3°	0	1	N/A	0.230769	N/A	N/A	0.769231	0	0	0.5
admixture	outbred	PUR	pmd-mask	0%	N/A	0.10X	TKGWV2	2°	0.983333	0.923	0.793011	0.230769	0.877976	0.793011	0.994612	0.226923	0.286154	0.953167
admixture	outbred	PUR	pmd-mask	0%	N/A	0.10X	TKGWV2	1°	0.986667	1	1	0.230769	0.993289	1	0.996016	0.227692	0.227692	0.993333
admixture	outbred	PUR	pmd-mask	0%	N/A	0.10X	TKGWV2	S	1	1	1	0.0769231	1	1	1	0.0769231	0.0769231	1
admixture	outbred	PUR	pmd-mask	0%	N/A	0.10X	KIN	U	1	0.783	0.580271	0.230769	0.734394	0.580271	1	0.230769	0.397692	0.8915
admixture	outbred	PUR	pmd-mask	0%	N/A	0.10X	KIN	3°	0.296667	0.904	0.481081	0.230769	0.36701	0.481081	0.810762	0.0684615	0.142308	0.600333
admixture	outbred	PUR	pmd-mask	0%	N/A	0.10X	KIN	2°	0.656667	0.983	0.920561	0.230769	0.766537	0.920561	0.905157	0.151538	0.164615	0.819833
admixture	outbred	PUR	pmd-mask	0%	N/A	0.10X	KIN	1°	0.946667	1	1	0.230769	0.972603	1	0.984252	0.218462	0.218462	0.973333
admixture	outbred	PUR	pmd-mask	0%	N/A	0.10X	KIN	S	1	1	1	0.0769231	1	1	1	0.0769231	0.0769231	1
admixture	outbred	PUR	pmd-mask	0%	N/A	0.10X	READv2	U	1	0.591	0.423131	0.230769	0.594648	0.423131	1	0.230769	0.545385	0.7955
admixture	outbred	PUR	pmd-mask	0%	N/A	0.10X	READv2	3°	0	1	N/A	0.230769	N/A	N/A	0.769231	0	0	0.5
admixture	outbred	PUR	pmd-mask	0%	N/A	0.10X	READv2	2°	0.633333	0.989	0.945274	0.230769	0.758483	0.945274	0.899909	0.146154	0.154615	0.811167
admixture	outbred	PUR	pmd-mask	0%	N/A	0.10X	READv2	1°	0.966667	1	1	0.230769	0.983051	1	0.990099	0.223077	0.223077	0.983333
admixture	outbred	PUR	pmd-mask	0%	N/A	0.10X	READv2	S	1	1	1	0.0769231	1	1	1	0.0769231	0.0769231	1
admixture	outbred	CLM	pmd-mask	0%	N/A	0.10X	correctKin	U	0.846667	0.998	0.992188	0.230769	0.913669	0.992188	0.955939	0.195385	0.196923	0.922333
admixture	outbred	CLM	pmd-mask	0%	N/A	0.10X	correctKin	3°	0.566667	0.953	0.78341	0.230769	0.65764	0.78341	0.879963	0.130769	0.166923	0.759833
admixture	outbred	CLM	pmd-mask	0%	N/A	0.10X	correctKin	2°	0.91	0.872	0.680798	0.230769	0.778887	0.680798	0.969967	0.21	0.308462	0.891
admixture	outbred	CLM	pmd-mask	0%	N/A	0.10X	correctKin	1°	0.996667	0.974	0.92	0.230769	0.9568	0.92	0.998974	0.23	0.25	0.985333
admixture	outbred	CLM	pmd-mask	0%	N/A	0.10X	correctKin	S	1	0.999167	0.990099	0.0769231	0.995025	0.990099	1	0.0769231	0.0776923	0.999583
admixture	outbred	CLM	pmd-mask	0%	N/A	0.10X	GRUPS	U	0.996667	0.812	0.613963	0.230769	0.759848	0.613963	0.99877	0.23	0.374615	0.904333
admixture	outbred	CLM	pmd-mask	0%	N/A	0.10X	GRUPS	3°	0.39	0.809	0.37987	0.230769	0.384868	0.37987	0.815524	0.09	0.236923	0.5995
admixture	outbred	CLM	pmd-mask	0%	N/A	0.10X	GRUPS	2°	0.35	0.961	0.729167	0.230769	0.472973	0.729167	0.831315	0.0807692	0.110769	0.6555
admixture	outbred	CLM	pmd-mask	0%	N/A	0.10X	GRUPS	1°	0.87	1	1	0.230769	0.930481	1	0.962464	0.200769	0.200769	0.935
admixture	outbred	CLM	pmd-mask	0%	N/A	0.10X	GRUPS	S	1	1	1	0.0769231	1	1	1	0.0769231	0.0769231	1
admixture	outbred	CLM	pmd-mask	0%	N/A	0.10X	TKGWV2	U	1	0.831	0.639659	0.230769	0.780234	0.639659	1	0.230769	0.360769	0.9155
admixture	outbred	CLM	pmd-mask	0%	N/A	0.10X	TKGWV2	3°	0	1	N/A	0.230769	N/A	N/A	0.769231	0	0	0.5
admixture	outbred	CLM	pmd-mask	0%	N/A	0.10X	TKGWV2	2°	0.996667	0.868	0.693735	0.230769	0.818057	0.693735	0.998849	0.23	0.331538	0.932333
admixture	outbred	CLM	pmd-mask	0%	N/A	0.10X	TKGWV2	1°	0.99	0.999	0.996644	0.230769	0.993311	0.996644	0.997006	0.228462	0.229231	0.9945
admixture	outbred	CLM	pmd-mask	0%	N/A	0.10X	TKGWV2	S	1	0.998333	0.980392	0.0769231	0.990099	0.980392	1	0.0769231	0.0784615	0.999167
admixture	outbred	CLM	pmd-mask	0%	N/A	0.10X	KIN	U	1	0.79	0.588235	0.230769	0.740741	0.588235	1	0.230769	0.392308	0.895
admixture	outbred	CLM	pmd-mask	0%	N/A	0.10X	KIN	3°	0.296667	0.885	0.436275	0.230769	0.353175	0.436275	0.807482	0.0684615	0.156923	0.590833
admixture	outbred	CLM	pmd-mask	0%	N/A	0.10X	KIN	2°	0.606667	0.976	0.883495	0.230769	0.719368	0.883495	0.892139	0.14	0.158462	0.791333
admixture	outbred	CLM	pmd-mask	0%	N/A	0.10X	KIN	1°	0.933333	1	1	0.230769	0.965517	1	0.980392	0.215385	0.215385	0.966667
admixture	outbred	CLM	pmd-mask	0%	N/A	0.10X	KIN	S	1	1	1	0.0769231	1	1	1	0.0769231	0.0769231	1
admixture	outbred	CLM	pmd-mask	0%	N/A	0.10X	READv2	U	1	0.573	0.412655	0.230769	0.584226	0.412655	1	0.230769	0.559231	0.7865
admixture	outbred	CLM	pmd-mask	0%	N/A	0.10X	READv2	3°	0	1	N/A	0.230769	N/A	N/A	0.769231	0	0	0.5
admixture	outbred	CLM	pmd-mask	0%	N/A	0.10X	READv2	2°	0.566667	0.985	0.918919	0.230769	0.701031	0.918919	0.883408	0.130769	0.142308	0.775833
admixture	outbred	CLM	pmd-mask	0%	N/A	0.10X	READv2	1°	0.96	1	1	0.230769	0.979592	1	0.988142	0.221538	0.221538	0.98
admixture	outbred	CLM	pmd-mask	0%	N/A	0.10X	READv2	S	1	1	1	0.0769231	1	1	1	0.0769231	0.0769231	1
admixture	outbred	MXL	pmd-mask	0%	N/A	0.10X	correctKin	U	0.286667	1	1	0.230769	0.445596	1	0.823723	0.0661538	0.0661538	0.643333
admixture	outbred	MXL	pmd-mask	0%	N/A	0.10X	correctKin	3°	0.106667	0.846	0.172043	0.230769	0.131687	0.172043	0.759425	0.0246154	0.143077	0.476333
admixture	outbred	MXL	pmd-mask	0%	N/A	0.10X	correctKin	2°	0.473333	0.681	0.308026	0.230769	0.373193	0.308026	0.811681	0.109231	0.354615	0.577167
admixture	outbred	MXL	pmd-mask	0%	N/A	0.10X	correctKin	1°	0.95	0.833	0.630531	0.230769	0.757979	0.630531	0.982311	0.219231	0.347692	0.8915
admixture	outbred	MXL	pmd-mask	0%	N/A	0.10X	correctKin	S	1	0.9875	0.869565	0.0769231	0.930233	0.869565	1	0.0769231	0.0884615	0.99375
admixture	outbred	MXL	pmd-mask	0%	N/A	0.10X	GRUPS	U	0.893333	0.934	0.802395	0.230769	0.845426	0.802395	0.966874	0.206154	0.256923	0.913667
admixture	outbred	MXL	pmd-mask	0%	N/A	0.10X	GRUPS	3°	0.686667	0.899	0.67101	0.230769	0.678748	0.67101	0.905337	0.158462	0.236154	0.792833
admixture	outbred	MXL	pmd-mask	0%	N/A	0.10X	GRUPS	2°	0.74	0.967	0.870588	0.230769	0.8	0.870588	0.925359	0.170769	0.196154	0.8535
admixture	outbred	MXL	pmd-mask	0%	N/A	0.10X	GRUPS	1°	0.986667	0.992	0.973684	0.230769	0.980132	0.973684	0.995984	0.227692	0.233846	0.989333
admixture	outbred	MXL	pmd-mask	0%	N/A	0.10X	GRUPS	S	1	1	1	0.0769231	1	1	1	0.0769231	0.0769231	1
admixture	outbred	MXL	pmd-mask	0%	N/A	0.10X	TKGWV2	U	0.83	0.963	0.870629	0.230769	0.849829	0.870629	0.949704	0.191538	0.22	0.8965
admixture	outbred	MXL	pmd-mask	0%	N/A	0.10X	TKGWV2	3°	0	1	N/A	0.230769	N/A	N/A	0.769231	0	0	0.5
admixture	outbred	MXL	pmd-mask	0%	N/A	0.10X	TKGWV2	2°	0.87	0.686	0.453913	0.230769	0.596571	0.453913	0.946207	0.200769	0.442308	0.778
admixture	outbred	MXL	pmd-mask	0%	N/A	0.10X	TKGWV2	1°	0.916667	0.961	0.875796	0.230769	0.895765	0.875796	0.974645	0.211538	0.241538	0.938833
admixture	outbred	MXL	pmd-mask	0%	N/A	0.10X	TKGWV2	S	1	0.979167	0.8	0.0769231	0.888889	0.8	1	0.0769231	0.0961538	0.989583
admixture	outbred	MXL	pmd-mask	0%	N/A	0.10X	KIN	U	1	0.763	0.558659	0.230769	0.716846	0.558659	1	0.230769	0.413077	0.8815
admixture	outbred	MXL	pmd-mask	0%	N/A	0.10X	KIN	3°	0.233333	0.887	0.382514	0.230769	0.289855	0.382514	0.794091	0.0538462	0.140769	0.560167
admixture	outbred	MXL	pmd-mask	0%	N/A	0.10X	KIN	2°	0.576667	0.958	0.804651	0.230769	0.671845	0.804651	0.882949	0.133077	0.165385	0.767333
admixture	outbred	MXL	pmd-mask	0%	N/A	0.10X	KIN	1°	0.883333	1	1	0.230769	0.938053	1	0.966184	0.203846	0.203846	0.941667
admixture	outbred	MXL	pmd-mask	0%	N/A	0.10X	KIN	S	1	1	1	0.0769231	1	1	1	0.0769231	0.0769231	1
admixture	outbred	MXL	pmd-mask	0%	N/A	0.10X	READv2	U	1	0.572	0.412088	0.230769	0.583658	0.412088	1	0.230769	0.56	0.786
admixture	outbred	MXL	pmd-mask	0%	N/A	0.10X	READv2	3°	0	1	N/A	0.230769	N/A	N/A	0.769231	0	0	0.5
admixture	outbred	MXL	pmd-mask	0%	N/A	0.10X	READv2	2°	0.543333	0.966	0.827411	0.230769	0.655936	0.827411	0.875793	0.125385	0.151538	0.754667
admixture	outbred	MXL	pmd-mask	0%	N/A	0.10X	READv2	1°	0.916667	1	1	0.230769	0.956522	1	0.97561	0.211538	0.211538	0.958333
admixture	outbred	MXL	pmd-mask	0%	N/A	0.10X	READv2	S	1	1	1	0.0769231	1	1	1	0.0769231	0.0769231	1
admixture	outbred	PEL	pmd-mask	0%	N/A	0.10X	correctKin	U	0	1	N/A	0.230769	N/A	N/A	0.769231	0	0	0.5
admixture	outbred	PEL	pmd-mask	0%	N/A	0.10X	correctKin	3°	0	0.987	0	0.230769	N/A	0	0.7669	0	0.01	0.4935
admixture	outbred	PEL	pmd-mask	0%	N/A	0.10X	correctKin	2°	0.0133333	0.75	0.015748	0.230769	0.0144404	0.015748	0.717017	0.00307692	0.195385	0.381667
admixture	outbred	PEL	pmd-mask	0%	N/A	0.10X	correctKin	1°	0.43	0.369	0.169737	0.230769	0.243396	0.169737	0.683333	0.0992308	0.584615	0.3995
admixture	outbred	PEL	pmd-mask	0%	N/A	0.10X	correctKin	S	1	0.855833	0.3663	0.0769231	0.536193	0.3663	1	0.0769231	0.21	0.927917
admixture	outbred	PEL	pmd-mask	0%	N/A	0.10X	GRUPS	U	0.18	0.996	0.931034	0.230769	0.301676	0.931034	0.801932	0.0415385	0.0446154	0.588
admixture	outbred	PEL	pmd-mask	0%	N/A	0.10X	GRUPS	3°	0.143333	0.848	0.220513	0.230769	0.173737	0.220513	0.767421	0.0330769	0.15	0.495667
admixture	outbred	PEL	pmd-mask	0%	N/A	0.10X	GRUPS	2°	0.486667	0.669	0.30608	0.230769	0.375804	0.30608	0.81288	0.112308	0.366923	0.577833
admixture	outbred	PEL	pmd-mask	0%	N/A	0.10X	GRUPS	1°	0.99	0.83	0.635974	0.230769	0.774446	0.635974	0.996399	0.228462	0.359231	0.91
admixture	outbred	PEL	pmd-mask	0%	N/A	0.10X	GRUPS	S	1	0.9975	0.970874	0.0769231	0.985222	0.970874	1	0.0769231	0.0792308	0.99875
admixture	outbred	PEL	pmd-mask	0%	N/A	0.10X	TKGWV2	U	0.0633333	1	1	0.230769	0.119122	1	0.78064	0.0146154	0.0146154	0.531667
admixture	outbred	PEL	pmd-mask	0%	N/A	0.10X	TKGWV2	3°	0	1	N/A	0.230769	N/A	N/A	0.769231	0	0	0.5
admixture	outbred	PEL	pmd-mask	0%	N/A	0.10X	TKGWV2	2°	0.12	0.566	0.0765957	0.230769	0.0935065	0.0765957	0.681928	0.0276923	0.361538	0.343
admixture	outbred	PEL	pmd-mask	0%	N/A	0.10X	TKGWV2	1°	0.243333	0.6	0.154334	0.230769	0.188875	0.154334	0.725514	0.0561538	0.363846	0.421667
admixture	outbred	PEL	pmd-mask	0%	N/A	0.10X	TKGWV2	S	1	0.801667	0.295858	0.0769231	0.456621	0.295858	1	0.0769231	0.26	0.900833
admixture	outbred	PEL	pmd-mask	0%	N/A	0.10X	KIN	U	0.996667	0.734	0.529204	0.230769	0.691329	0.529204	0.998639	0.23	0.434615	0.865333
admixture	outbred	PEL	pmd-mask	0%	N/A	0.10X	KIN	3°	0.24	0.875	0.365482	0.230769	0.289738	0.365482	0.793291	0.0553846	0.151538	0.5575
admixture	outbred	PEL	pmd-mask	0%	N/A	0.10X	KIN	2°	0.45	0.924	0.63981	0.230769	0.528376	0.63981	0.848485	0.103846	0.162308	0.687
admixture	outbred	PEL	pmd-mask	0%	N/A	0.10X	KIN	1°	0.756667	0.994	0.974249	0.230769	0.851782	0.974249	0.931584	0.174615	0.179231	0.875333
admixture	outbred	PEL	pmd-mask	0%	N/A	0.10X	KIN	S	0.94	1	1	0.0769231	0.969072	1	0.995025	0.0723077	0.0723077	0.97
admixture	outbred	PEL	pmd-mask	0%	N/A	0.10X	READv2	U	1	0.529	0.389105	0.230769	0.560224	0.389105	1	0.230769	0.593077	0.7645
admixture	outbred	PEL	pmd-mask	0%	N/A	0.10X	READv2	3°	0	1	N/A	0.230769	N/A	N/A	0.769231	0	0	0.5
admixture	outbred	PEL	pmd-mask	0%	N/A	0.10X	READv2	2°	0.42	0.924	0.623762	0.230769	0.501992	0.623762	0.84153	0.0969231	0.155385	0.672
admixture	outbred	PEL	pmd-mask	0%	N/A	0.10X	READv2	1°	0.756667	0.997	0.986957	0.230769	0.856604	0.986957	0.931776	0.174615	0.176923	0.876833
admixture	outbred	PEL	pmd-mask	0%	N/A	0.10X	READv2	S	0.97	1	1	0.0769231	0.984772	1	0.997506	0.0746154	0.0746154	0.985
admixture	outbred	ASW	pmd-mask	0%	N/A	0.10X	correctKin	U	0.02	1	1	0.230769	0.0392157	1	0.772798	0.00461538	0.00461538	0.51
admixture	outbred	ASW	pmd-mask	0%	N/A	0.10X	correctKin	3°	0	0.994	0	0.230769	N/A	0	0.768161	0	0.00461538	0.497
admixture	outbred	ASW	pmd-mask	0%	N/A	0.10X	correctKin	2°	0.01	0.83	0.017341	0.230769	0.012685	0.017341	0.736469	0.00230769	0.133077	0.42
admixture	outbred	ASW	pmd-mask	0%	N/A	0.10X	correctKin	1°	0.176667	0.3	0.0703851	0.230769	0.100665	0.0703851	0.548446	0.0407692	0.579231	0.238333
admixture	outbred	ASW	pmd-mask	0%	N/A	0.10X	correctKin	S	1	0.781667	0.276243	0.0769231	0.4329	0.276243	1	0.0769231	0.278462	0.890833
admixture	outbred	ASW	pmd-mask	0%	N/A	0.10X	GRUPS	U	0.993333	0.558	0.402703	0.230769	0.573077	0.402703	0.996429	0.229231	0.569231	0.775667
admixture	outbred	ASW	pmd-mask	0%	N/A	0.10X	GRUPS	3°	0.00666667	0.849	0.0130719	0.230769	0.00883002	0.0130719	0.740192	0.00153846	0.117692	0.427833
admixture	outbred	ASW	pmd-mask	0%	N/A	0.10X	GRUPS	2°	0.0266667	0.75	0.0310078	0.230769	0.0286738	0.0310078	0.71977	0.00615385	0.198462	0.388333
admixture	outbred	ASW	pmd-mask	0%	N/A	0.10X	GRUPS	1°	0.16	0.999	0.979592	0.230769	0.275072	0.979592	0.798561	0.0369231	0.0376923	0.5795
admixture	outbred	ASW	pmd-mask	0%	N/A	0.10X	GRUPS	S	1	1	1	0.0769231	1	1	1	0.0769231	0.0769231	1
admixture	outbred	ASW	pmd-mask	0%	N/A	0.10X	TKGWV2	U	0.496667	0.983	0.89759	0.230769	0.639485	0.89759	0.866843	0.114615	0.127692	0.739833
admixture	outbred	ASW	pmd-mask	0%	N/A	0.10X	TKGWV2	3°	0	1	N/A	0.230769	N/A	N/A	0.769231	0	0	0.5
admixture	outbred	ASW	pmd-mask	0%	N/A	0.10X	TKGWV2	2°	0.596667	0.564	0.291057	0.230769	0.391257	0.291057	0.823358	0.137692	0.473077	0.580333
admixture	outbred	ASW	pmd-mask	0%	N/A	0.10X	TKGWV2	1°	0.79	0.881	0.66573	0.230769	0.722561	0.66573	0.933263	0.182308	0.273846	0.8355
admixture	outbred	ASW	pmd-mask	0%	N/A	0.10X	TKGWV2	S	1	0.9475	0.613497	0.0769231	0.760456	0.613497	1	0.0769231	0.125385	0.97375
admixture	outbred	ASW	pmd-mask	0%	N/A	0.10X	KIN	U	1	0.769	0.564972	0.230769	0.722022	0.564972	1	0.230769	0.408462	0.8845
admixture	outbred	ASW	pmd-mask	0%	N/A	0.10X	KIN	3°	0.25	0.891	0.407609	0.230769	0.309917	0.407609	0.798387	0.0576923	0.141538	0.5705
admixture	outbred	ASW	pmd-mask	0%	N/A	0.10X	KIN	2°	0.603333	0.968	0.849765	0.230769	0.705653	0.849765	0.890524	0.139231	0.163846	0.785667
admixture	outbred	ASW	pmd-mask	0%	N/A	0.10X	KIN	1°	0.903333	0.999	0.996324	0.230769	0.947552	0.996324	0.97179	0.208462	0.209231	0.951167
admixture	outbred	ASW	pmd-mask	0%	N/A	0.10X	KIN	S	1	1	1	0.0769231	1	1	1	0.0769231	0.0769231	1
admixture	outbred	ASW	pmd-mask	0%	N/A	0.10X	READv2	U	1	0.578	0.415512	0.230769	0.587084	0.415512	1	0.230769	0.555385	0.789
admixture	outbred	ASW	pmd-mask	0%	N/A	0.10X	READv2	3°	0	1	N/A	0.230769	N/A	N/A	0.769231	0	0	0.5
admixture	outbred	ASW	pmd-mask	0%	N/A	0.10X	READv2	2°	0.58	0.978	0.887755	0.230769	0.701613	0.887755	0.88587	0.133846	0.150769	0.779
admixture	outbred	ASW	pmd-mask	0%	N/A	0.10X	READv2	1°	0.93	0.998	0.992883	0.230769	0.960413	0.992883	0.979392	0.214615	0.216154	0.964
admixture	outbred	ASW	pmd-mask	0%	N/A	0.10X	READv2	S	1	0.999167	0.990099	0.0769231	0.995025	0.990099	1	0.0769231	0.0776923	0.999583
contamination	outbred	CEU	pmd-mask	1%	AFR	0.10X	correctKin	U	1	0.927	0.80429	0.230769	0.89153	0.80429	1	0.230769	0.286923	0.9635
contamination	outbred	CEU	pmd-mask	1%	AFR	0.10X	correctKin	3°	0.72	0.971	0.881633	0.230769	0.792661	0.881633	0.920379	0.166154	0.188462	0.8455
contamination	outbred	CEU	pmd-mask	1%	AFR	0.10X	correctKin	2°	0.903333	0.988	0.957597	0.230769	0.929674	0.957597	0.971485	0.208462	0.217692	0.945667
contamination	outbred	CEU	pmd-mask	1%	AFR	0.10X	correctKin	1°	0.996667	1	1	0.230769	0.998331	1	0.999001	0.23	0.23	0.998333
contamination	outbred	CEU	pmd-mask	1%	AFR	0.10X	correctKin	S	1	1	1	0.0769231	1	1	1	0.0769231	0.0769231	1
contamination	outbred	CEU	pmd-mask	1%	AFR	0.10X	GRUPS	U	0.993333	0.96	0.881657	0.230769	0.934169	0.881657	0.997921	0.229231	0.26	0.976667
contamination	outbred	CEU	pmd-mask	1%	AFR	0.10X	GRUPS	3°	0.826667	0.951	0.835017	0.230769	0.830821	0.835017	0.948156	0.190769	0.228462	0.888833
contamination	outbred	CEU	pmd-mask	1%	AFR	0.10X	GRUPS	2°	0.843333	0.988	0.954717	0.230769	0.895575	0.954717	0.954589	0.194615	0.203846	0.915667
contamination	outbred	CEU	pmd-mask	1%	AFR	0.10X	GRUPS	1°	1	1	1	0.230769	1	1	1	0.230769	0.230769	1
contamination	outbred	CEU	pmd-mask	1%	AFR	0.10X	GRUPS	S	1	1	1	0.0769231	1	1	1	0.0769231	0.0769231	1
contamination	outbred	CEU	pmd-mask	1%	AFR	0.10X	TKGWV2	U	1	0.839	0.650759	0.230769	0.788436	0.650759	1	0.230769	0.354615	0.9195
contamination	outbred	CEU	pmd-mask	1%	AFR	0.10X	TKGWV2	3°	0	1	N/A	0.230769	N/A	N/A	0.769231	0	0	0.5
contamination	outbred	CEU	pmd-mask	1%	AFR	0.10X	TKGWV2	2°	1	0.86	0.681818	0.230769	0.810811	0.681818	1	0.230769	0.338462	0.93
contamination	outbred	CEU	pmd-mask	1%	AFR	0.10X	TKGWV2	1°	0.996667	1	1	0.230769	0.998331	1	0.999001	0.23	0.23	0.998333
contamination	outbred	CEU	pmd-mask	1%	AFR	0.10X	TKGWV2	S	1	1	1	0.0769231	1	1	1	0.0769231	0.0769231	1
contamination	outbred	CEU	pmd-mask	1%	AFR	0.10X	KIN	U	1	0.796	0.595238	0.230769	0.746269	0.595238	1	0.230769	0.387692	0.898
contamination	outbred	CEU	pmd-mask	1%	AFR	0.10X	KIN	3°	0.326667	0.91	0.521277	0.230769	0.401639	0.521277	0.818345	0.0753846	0.144615	0.618333
contamination	outbred	CEU	pmd-mask	1%	AFR	0.10X	KIN	2°	0.686667	0.988	0.944954	0.230769	0.795367	0.944954	0.913124	0.158462	0.167692	0.837333
contamination	outbred	CEU	pmd-mask	1%	AFR	0.10X	KIN	1°	0.966667	1	1	0.230769	0.983051	1	0.990099	0.223077	0.223077	0.983333
contamination	outbred	CEU	pmd-mask	1%	AFR	0.10X	KIN	S	1	1	1	0.0769231	1	1	1	0.0769231	0.0769231	1
contamination	outbred	CEU	pmd-mask	1%	AFR	0.10X	READv2	U	1	0.601	0.429185	0.230769	0.600601	0.429185	1	0.230769	0.537692	0.8005
contamination	outbred	CEU	pmd-mask	1%	AFR	0.10X	READv2	3°	0	1	N/A	0.230769	N/A	N/A	0.769231	0	0	0.5
contamination	outbred	CEU	pmd-mask	1%	AFR	0.10X	READv2	2°	0.66	0.988	0.942857	0.230769	0.776471	0.942857	0.906422	0.152308	0.161538	0.824
contamination	outbred	CEU	pmd-mask	1%	AFR	0.10X	READv2	1°	0.97	1	1	0.230769	0.984772	1	0.99108	0.223846	0.223846	0.985
contamination	outbred	CEU	pmd-mask	1%	AFR	0.10X	READv2	S	1	1	1	0.0769231	1	1	1	0.0769231	0.0769231	1
contamination	outbred	CEU	pmd-mask	2%	AFR	0.10X	correctKin	U	1	0.942	0.837989	0.230769	0.911854	0.837989	1	0.230769	0.275385	0.971
contamination	outbred	CEU	pmd-mask	2%	AFR	0.10X	correctKin	3°	0.766667	0.971	0.888031	0.230769	0.822898	0.888031	0.932757	0.176923	0.199231	0.868833
contamination	outbred	CEU	pmd-mask	2%	AFR	0.10X	correctKin	2°	0.903333	0.985	0.947552	0.230769	0.924915	0.947552	0.9714	0.208462	0.22	0.944167
contamination	outbred	CEU	pmd-mask	2%	AFR	0.10X	correctKin	1°	0.99	1	1	0.230769	0.994975	1	0.997009	0.228462	0.228462	0.995
contamination	outbred	CEU	pmd-mask	2%	AFR	0.10X	correctKin	S	1	1	1	0.0769231	1	1	1	0.0769231	0.0769231	1
contamination	outbred	CEU	pmd-mask	2%	AFR	0.10X	GRUPS	U	0.976667	0.967	0.898773	0.230769	0.936102	0.898773	0.992813	0.225385	0.250769	0.971833
contamination	outbred	CEU	pmd-mask	2%	AFR	0.10X	GRUPS	3°	0.87	0.943	0.820755	0.230769	0.84466	0.820755	0.960285	0.200769	0.244615	0.9065
contamination	outbred	CEU	pmd-mask	2%	AFR	0.10X	GRUPS	2°	0.826667	0.99	0.96124	0.230769	0.888889	0.96124	0.950096	0.190769	0.198462	0.908333
contamination	outbred	CEU	pmd-mask	2%	AFR	0.10X	GRUPS	1°	0.986667	0.998	0.993289	0.230769	0.989967	0.993289	0.996008	0.227692	0.229231	0.992333
contamination	outbred	CEU	pmd-mask	2%	AFR	0.10X	GRUPS	S	1	1	1	0.0769231	1	1	1	0.0769231	0.0769231	1
contamination	outbred	CEU	pmd-mask	2%	AFR	0.10X	TKGWV2	U	1	0.816	0.619835	0.230769	0.765306	0.619835	1	0.230769	0.372308	0.908
contamination	outbred	CEU	pmd-mask	2%	AFR	0.10X	TKGWV2	3°	0	1	N/A	0.230769	N/A	N/A	0.769231	0	0	0.5
contamination	outbred	CEU	pmd-mask	2%	AFR	0.10X	TKGWV2	2°	0.996667	0.881	0.715311	0.230769	0.832869	0.715311	0.998866	0.23	0.321538	0.938833
contamination	outbred	CEU	pmd-mask	2%	AFR	0.10X	TKGWV2	1°	0.993333	1	1	0.230769	0.996656	1	0.998004	0.229231	0.229231	0.996667
contamination	outbred	CEU	pmd-mask	2%	AFR	0.10X	TKGWV2	S	1	1	1	0.0769231	1	1	1	0.0769231	0.0769231	1
contamination	outbred	CEU	pmd-mask	2%	AFR	0.10X	KIN	U	1	0.772	0.568182	0.230769	0.724638	0.568182	1	0.230769	0.406154	0.886
contamination	outbred	CEU	pmd-mask	2%	AFR	0.10X	KIN	3°	0.263333	0.901	0.44382	0.230769	0.330544	0.44382	0.80303	0.0607692	0.136923	0.582167
contamination	outbred	CEU	pmd-mask	2%	AFR	0.10X	KIN	2°	0.64	0.979	0.901408	0.230769	0.748538	0.901408	0.900644	0.147692	0.163846	0.8095
contamination	outbred	CEU	pmd-mask	2%	AFR	0.10X	KIN	1°	0.936667	1	1	0.230769	0.967298	1	0.981354	0.216154	0.216154	0.968333
contamination	outbred	CEU	pmd-mask	2%	AFR	0.10X	KIN	S	1	1	1	0.0769231	1	1	1	0.0769231	0.0769231	1
contamination	outbred	CEU	pmd-mask	2%	AFR	0.10X	READv2	U	1	0.589	0.421941	0.230769	0.593472	0.421941	1	0.230769	0.546923	0.7945
contamination	outbred	CEU	pmd-mask	2%	AFR	0.10X	READv2	3°	0	1	N/A	0.230769	N/A	N/A	0.769231	0	0	0.5
contamination	outbred	CEU	pmd-mask	2%	AFR	0.10X	READv2	2°	0.626667	0.988	0.94	0.230769	0.752	0.94	0.898182	0.144615	0.153846	0.807333
contamination	outbred	CEU	pmd-mask	2%	AFR	0.10X	READv2	1°	0.963333	1	1	0.230769	0.981324	1	0.98912	0.222308	0.222308	0.981667
contamination	outbred	CEU	pmd-mask	2%	AFR	0.10X	READv2	S	1	1	1	0.0769231	1	1	1	0.0769231	0.0769231	1
contamination	outbred	CEU	pmd-mask	3%	AFR	0.10X	correctKin	U	1	0.926	0.802139	0.230769	0.890208	0.802139	1	0.230769	0.287692	0.963
contamination	outbred	CEU	pmd-mask	3%	AFR	0.10X	correctKin	3°	0.706667	0.968	0.868852	0.230769	0.779412	0.868852	0.916667	0.163077	0.187692	0.837333
contamination	outbred	CEU	pmd-mask	3%	AFR	0.10X	correctKin	2°	0.89	0.982	0.936842	0.230769	0.912821	0.936842	0.967488	0.205385	0.219231	0.936
contamination	outbred	CEU	pmd-mask	3%	AFR	0.10X	correctKin	1°	0.99	1	1	0.230769	0.994975	1	0.997009	0.228462	0.228462	0.995
contamination	outbred	CEU	pmd-mask	3%	AFR	0.10X	correctKin	S	1	1	1	0.0769231	1	1	1	0.0769231	0.0769231	1
contamination	outbred	CEU	pmd-mask	3%	AFR	0.10X	GRUPS	U	0.996667	0.958	0.876833	0.230769	0.932917	0.876833	0.998957	0.23	0.262308	0.977333
contamination	outbred	CEU	pmd-mask	3%	AFR	0.10X	GRUPS	3°	0.836667	0.925	0.769939	0.230769	0.801917	0.769939	0.949692	0.193077	0.250769	0.880833
contamination	outbred	CEU	pmd-mask	3%	AFR	0.10X	GRUPS	2°	0.75	0.987	0.945378	0.230769	0.836431	0.945378	0.929379	0.173077	0.183077	0.8685
contamination	outbred	CEU	pmd-mask	3%	AFR	0.10X	GRUPS	1°	0.983333	1	1	0.230769	0.991597	1	0.995025	0.226923	0.226923	0.991667
contamination	outbred	CEU	pmd-mask	3%	AFR	0.10X	GRUPS	S	1	1	1	0.0769231	1	1	1	0.0769231	0.0769231	1
contamination	outbred	CEU	pmd-mask	3%	AFR	0.10X	TKGWV2	U	1	0.81	0.612245	0.230769	0.759494	0.612245	1	0.230769	0.376923	0.905
contamination	outbred	CEU	pmd-mask	3%	AFR	0.10X	TKGWV2	3°	0	1	N/A	0.230769	N/A	N/A	0.769231	0	0	0.5
contamination	outbred	CEU	pmd-mask	3%	AFR	0.10X	TKGWV2	2°	0.99	0.885	0.720874	0.230769	0.83427	0.720874	0.996622	0.228462	0.316923	0.9375
contamination	outbred	CEU	pmd-mask	3%	AFR	0.10X	TKGWV2	1°	0.993333	1	1	0.230769	0.996656	1	0.998004	0.229231	0.229231	0.996667
contamination	outbred	CEU	pmd-mask	3%	AFR	0.10X	TKGWV2	S	1	1	1	0.0769231	1	1	1	0.0769231	0.0769231	1
contamination	outbred	CEU	pmd-mask	3%	AFR	0.10X	KIN	U	1	0.782	0.579151	0.230769	0.733496	0.579151	1	0.230769	0.398462	0.891
contamination	outbred	CEU	pmd-mask	3%	AFR	0.10X	KIN	3°	0.303333	0.889	0.450495	0.230769	0.36255	0.450495	0.809654	0.07	0.155385	0.596167
contamination	outbred	CEU	pmd-mask	3%	AFR	0.10X	KIN	2°	0.6	0.974	0.873786	0.230769	0.711462	0.873786	0.890311	0.138462	0.158462	0.787
contamination	outbred	CEU	pmd-mask	3%	AFR	0.10X	KIN	1°	0.913333	1	1	0.230769	0.954704	1	0.974659	0.210769	0.210769	0.956667
contamination	outbred	CEU	pmd-mask	3%	AFR	0.10X	KIN	S	1	1	1	0.0769231	1	1	1	0.0769231	0.0769231	1
contamination	outbred	CEU	pmd-mask	3%	AFR	0.10X	READv2	U	1	0.571	0.411523	0.230769	0.58309	0.411523	1	0.230769	0.560769	0.7855
contamination	outbred	CEU	pmd-mask	3%	AFR	0.10X	READv2	3°	0	1	N/A	0.230769	N/A	N/A	0.769231	0	0	0.5
contamination	outbred	CEU	pmd-mask	3%	AFR	0.10X	READv2	2°	0.563333	0.982	0.903743	0.230769	0.694045	0.903743	0.8823	0.13	0.143846	0.772667
contamination	outbred	CEU	pmd-mask	3%	AFR	0.10X	READv2	1°	0.946667	1	1	0.230769	0.972603	1	0.984252	0.218462	0.218462	0.973333
contamination	outbred	CEU	pmd-mask	3%	AFR	0.10X	READv2	S	1	1	1	0.0769231	1	1	1	0.0769231	0.0769231	1
contamination	outbred	CEU	pmd-mask	4%	AFR	0.10X	correctKin	U	1	0.941	0.835655	0.230769	0.91047	0.835655	1	0.230769	0.276154	0.9705
contamination	outbred	CEU	pmd-mask	4%	AFR	0.10X	correctKin	3°	0.776667	0.964	0.866171	0.230769	0.818981	0.866171	0.935015	0.179231	0.206923	0.870333
contamination	outbred	CEU	pmd-mask	4%	AFR	0.10X	correctKin	2°	0.88	0.988	0.956522	0.230769	0.916667	0.956522	0.964844	0.203077	0.212308	0.934
contamination	outbred	CEU	pmd-mask	4%	AFR	0.10X	correctKin	1°	0.986667	1	1	0.230769	0.993289	1	0.996016	0.227692	0.227692	0.993333
contamination	outbred	CEU	pmd-mask	4%	AFR	0.10X	correctKin	S	1	1	1	0.0769231	1	1	1	0.0769231	0.0769231	1
contamination	outbred	CEU	pmd-mask	4%	AFR	0.10X	GRUPS	U	0.99	0.959	0.878698	0.230769	0.931034	0.878698	0.996881	0.228462	0.26	0.9745
contamination	outbred	CEU	pmd-mask	4%	AFR	0.10X	GRUPS	3°	0.86	0.907	0.735043	0.230769	0.792627	0.735043	0.955743	0.198462	0.27	0.8835
contamination	outbred	CEU	pmd-mask	4%	AFR	0.10X	GRUPS	2°	0.7	0.992	0.963303	0.230769	0.810811	0.963303	0.916821	0.161538	0.167692	0.846
contamination	outbred	CEU	pmd-mask	4%	AFR	0.10X	GRUPS	1°	0.976667	1	1	0.230769	0.988196	1	0.993049	0.225385	0.225385	0.988333
contamination	outbred	CEU	pmd-mask	4%	AFR	0.10X	GRUPS	S	1	1	1	0.0769231	1	1	1	0.0769231	0.0769231	1
contamination	outbred	CEU	pmd-mask	4%	AFR	0.10X	TKGWV2	U	1	0.81	0.612245	0.230769	0.759494	0.612245	1	0.230769	0.376923	0.905
contamination	outbred	CEU	pmd-mask	4%	AFR	0.10X	TKGWV2	3°	0	1	N/A	0.230769	N/A	N/A	0.769231	0	0	0.5
contamination	outbred	CEU	pmd-mask	4%	AFR	0.10X	TKGWV2	2°	0.993333	0.884	0.719807	0.230769	0.834734	0.719807	0.997743	0.229231	0.318462	0.938667
contamination	outbred	CEU	pmd-mask	4%	AFR	0.10X	TKGWV2	1°	0.983333	0.999	0.996622	0.230769	0.989933	0.996622	0.99502	0.226923	0.227692	0.991167
contamination	outbred	CEU	pmd-mask	4%	AFR	0.10X	TKGWV2	S	1	1	1	0.0769231	1	1	1	0.0769231	0.0769231	1
contamination	outbred	CEU	pmd-mask	4%	AFR	0.10X	KIN	U	1	0.783	0.580271	0.230769	0.734394	0.580271	1	0.230769	0.397692	0.8915
contamination	outbred	CEU	pmd-mask	4%	AFR	0.10X	KIN	3°	0.29	0.878	0.416268	0.230769	0.341847	0.416268	0.804766	0.0669231	0.160769	0.584
contamination	outbred	CEU	pmd-mask	4%	AFR	0.10X	KIN	2°	0.576667	0.975	0.873737	0.230769	0.694779	0.873737	0.884755	0.133077	0.152308	0.775833
contamination	outbred	CEU	pmd-mask	4%	AFR	0.10X	KIN	1°	0.92	1	1	0.230769	0.958333	1	0.976562	0.212308	0.212308	0.96
contamination	outbred	CEU	pmd-mask	4%	AFR	0.10X	KIN	S	1	1	1	0.0769231	1	1	1	0.0769231	0.0769231	1
contamination	outbred	CEU	pmd-mask	4%	AFR	0.10X	READv2	U	1	0.565	0.408163	0.230769	0.57971	0.408163	1	0.230769	0.565385	0.7825
contamination	outbred	CEU	pmd-mask	4%	AFR	0.10X	READv2	3°	0	1	N/A	0.230769	N/A	N/A	0.769231	0	0	0.5
contamination	outbred	CEU	pmd-mask	4%	AFR	0.10X	READv2	2°	0.546667	0.978	0.88172	0.230769	0.674897	0.88172	0.877917	0.126154	0.143077	0.762333
contamination	outbred	CEU	pmd-mask	4%	AFR	0.10X	READv2	1°	0.93	1	1	0.230769	0.963731	1	0.979432	0.214615	0.214615	0.965
contamination	outbred	CEU	pmd-mask	4%	AFR	0.10X	READv2	S	1	1	1	0.0769231	1	1	1	0.0769231	0.0769231	1
contamination	outbred	CEU	pmd-mask	5%	AFR	0.10X	correctKin	U	1	0.922	0.793651	0.230769	0.884956	0.793651	1	0.230769	0.290769	0.961
contamination	outbred	CEU	pmd-mask	5%	AFR	0.10X	correctKin	3°	0.713333	0.965	0.859438	0.230769	0.779599	0.859438	0.918173	0.164615	0.191538	0.839167
contamination	outbred	CEU	pmd-mask	5%	AFR	0.10X	correctKin	2°	0.883333	0.989	0.960145	0.230769	0.920139	0.960145	0.96582	0.203846	0.212308	0.936167
contamination	outbred	CEU	pmd-mask	5%	AFR	0.10X	correctKin	1°	0.99	1	1	0.230769	0.994975	1	0.997009	0.228462	0.228462	0.995
contamination	outbred	CEU	pmd-mask	5%	AFR	0.10X	correctKin	S	1	1	1	0.0769231	1	1	1	0.0769231	0.0769231	1
contamination	outbred	CEU	pmd-mask	5%	AFR	0.10X	GRUPS	U	0.99	0.932	0.813699	0.230769	0.893233	0.813699	0.996791	0.228462	0.280769	0.961
contamination	outbred	CEU	pmd-mask	5%	AFR	0.10X	GRUPS	3°	0.766667	0.892	0.680473	0.230769	0.721003	0.680473	0.927235	0.176923	0.26	0.829333
contamination	outbred	CEU	pmd-mask	5%	AFR	0.10X	GRUPS	2°	0.65	0.986	0.933014	0.230769	0.766208	0.933014	0.903758	0.15	0.160769	0.818
contamination	outbred	CEU	pmd-mask	5%	AFR	0.10X	GRUPS	1°	0.96	1	1	0.230769	0.979592	1	0.988142	0.221538	0.221538	0.98
contamination	outbred	CEU	pmd-mask	5%	AFR	0.10X	GRUPS	S	1	1	1	0.0769231	1	1	1	0.0769231	0.0769231	1
contamination	outbred	CEU	pmd-mask	5%	AFR	0.10X	TKGWV2	U	1	0.789	0.587084	0.230769	0.739827	0.587084	1	0.230769	0.393077	0.8945
contamination	outbred	CEU	pmd-mask	5%	AFR	0.10X	TKGWV2	3°	0	1	N/A	0.230769	N/A	N/A	0.769231	0	0	0.5
contamination	outbred	CEU	pmd-mask	5%	AFR	0.10X	TKGWV2	2°	1	0.905	0.759494	0.230769	0.863309	0.759494	1	0.230769	0.303846	0.9525
contamination	outbred	CEU	pmd-mask	5%	AFR	0.10X	TKGWV2	1°	0.98	1	1	0.230769	0.989899	1	0.994036	0.226154	0.226154	0.99
contamination	outbred	CEU	pmd-mask	5%	AFR	0.10X	TKGWV2	S	1	1	1	0.0769231	1	1	1	0.0769231	0.0769231	1
contamination	outbred	CEU	pmd-mask	5%	AFR	0.10X	KIN	U	1	0.763	0.558659	0.230769	0.716846	0.558659	1	0.230769	0.413077	0.8815
contamination	outbred	CEU	pmd-mask	5%	AFR	0.10X	KIN	3°	0.223333	0.871	0.341837	0.230769	0.270161	0.341837	0.788949	0.0515385	0.150769	0.547167
contamination	outbred	CEU	pmd-mask	5%	AFR	0.10X	KIN	2°	0.553333	0.965	0.825871	0.230769	0.662675	0.825871	0.878071	0.127692	0.154615	0.759167
contamination	outbred	CEU	pmd-mask	5%	AFR	0.10X	KIN	1°	0.886667	1	1	0.230769	0.939929	1	0.967118	0.204615	0.204615	0.943333
contamination	outbred	CEU	pmd-mask	5%	AFR	0.10X	KIN	S	1	1	1	0.0769231	1	1	1	0.0769231	0.0769231	1
contamination	outbred	CEU	pmd-mask	5%	AFR	0.10X	READv2	U	1	0.558	0.404313	0.230769	0.575816	0.404313	1	0.230769	0.570769	0.779
contamination	outbred	CEU	pmd-mask	5%	AFR	0.10X	READv2	3°	0	1	N/A	0.230769	N/A	N/A	0.769231	0	0	0.5
contamination	outbred	CEU	pmd-mask	5%	AFR	0.10X	READv2	2°	0.523333	0.972	0.848649	0.230769	0.647423	0.848649	0.871749	0.120769	0.142308	0.747667
contamination	outbred	CEU	pmd-mask	5%	AFR	0.10X	READv2	1°	0.91	1	1	0.230769	0.95288	1	0.97371	0.21	0.21	0.955
contamination	outbred	CEU	pmd-mask	5%	AFR	0.10X	READv2	S	1	1	1	0.0769231	1	1	1	0.0769231	0.0769231	1
contamination	outbred	CEU	pmd-mask	10%	AFR	0.10X	correctKin	U	1	0.921	0.791557	0.230769	0.883652	0.791557	1	0.230769	0.291538	0.9605
contamination	outbred	CEU	pmd-mask	10%	AFR	0.10X	correctKin	3°	0.72	0.949	0.808989	0.230769	0.761905	0.808989	0.918683	0.166154	0.205385	0.8345
contamination	outbred	CEU	pmd-mask	10%	AFR	0.10X	correctKin	2°	0.83	0.989	0.957692	0.230769	0.889286	0.957692	0.950962	0.191538	0.2	0.9095
contamination	outbred	CEU	pmd-mask	10%	AFR	0.10X	correctKin	1°	0.98	1	1	0.230769	0.989899	1	0.994036	0.226154	0.226154	0.99
contamination	outbred	CEU	pmd-mask	10%	AFR	0.10X	correctKin	S	1	1	1	0.0769231	1	1	1	0.0769231	0.0769231	1
contamination	outbred	CEU	pmd-mask	10%	AFR	0.10X	GRUPS	U	0.993333	0.882	0.716346	0.230769	0.832402	0.716346	0.997738	0.229231	0.32	0.937667
contamination	outbred	CEU	pmd-mask	10%	AFR	0.10X	GRUPS	3°	0.606667	0.81	0.489247	0.230769	0.541667	0.489247	0.872845	0.14	0.286154	0.708333
contamination	outbred	CEU	pmd-mask	10%	AFR	0.10X	GRUPS	2°	0.37	0.929	0.60989	0.230769	0.460581	0.60989	0.830948	0.0853846	0.14	0.6495
contamination	outbred	CEU	pmd-mask	10%	AFR	0.10X	GRUPS	1°	0.766667	0.999	0.995671	0.230769	0.86629	0.995671	0.934518	0.176923	0.177692	0.882833
contamination	outbred	CEU	pmd-mask	10%	AFR	0.10X	GRUPS	S	0.99	1	1	0.0769231	0.994975	1	0.999167	0.0761538	0.0761538	0.995
contamination	outbred	CEU	pmd-mask	10%	AFR	0.10X	TKGWV2	U	1	0.758	0.553506	0.230769	0.712589	0.553506	1	0.230769	0.416923	0.879
contamination	outbred	CEU	pmd-mask	10%	AFR	0.10X	TKGWV2	3°	0	1	N/A	0.230769	N/A	N/A	0.769231	0	0	0.5
contamination	outbred	CEU	pmd-mask	10%	AFR	0.10X	TKGWV2	2°	0.993333	0.917	0.782152	0.230769	0.875184	0.782152	0.997824	0.229231	0.293077	0.955167
contamination	outbred	CEU	pmd-mask	10%	AFR	0.10X	TKGWV2	1°	0.923333	1	1	0.230769	0.960139	1	0.977517	0.213077	0.213077	0.961667
contamination	outbred	CEU	pmd-mask	10%	AFR	0.10X	TKGWV2	S	1	1	1	0.0769231	1	1	1	0.0769231	0.0769231	1
contamination	outbred	CEU	pmd-mask	10%	AFR	0.10X	KIN	U	1	0.754	0.549451	0.230769	0.70922	0.549451	1	0.230769	0.42	0.877
contamination	outbred	CEU	pmd-mask	10%	AFR	0.10X	KIN	3°	0.213333	0.855	0.30622	0.230769	0.251473	0.30622	0.783685	0.0492308	0.160769	0.534167
contamination	outbred	CEU	pmd-mask	10%	AFR	0.10X	KIN	2°	0.483333	0.923	0.653153	0.230769	0.555556	0.653153	0.856215	0.111538	0.170769	0.703167
contamination	outbred	CEU	pmd-mask	10%	AFR	0.10X	KIN	1°	0.743333	0.994	0.973799	0.230769	0.8431	0.973799	0.928105	0.171538	0.176154	0.868667
contamination	outbred	CEU	pmd-mask	10%	AFR	0.10X	KIN	S	0.94	1	1	0.0769231	0.969072	1	0.995025	0.0723077	0.0723077	0.97
contamination	outbred	CEU	pmd-mask	10%	AFR	0.10X	READv2	U	1	0.527	0.388098	0.230769	0.55918	0.388098	1	0.230769	0.594615	0.7635
contamination	outbred	CEU	pmd-mask	10%	AFR	0.10X	READv2	3°	0	1	N/A	0.230769	N/A	N/A	0.769231	0	0	0.5
contamination	outbred	CEU	pmd-mask	10%	AFR	0.10X	READv2	2°	0.423333	0.933	0.654639	0.230769	0.51417	0.654639	0.84358	0.0976923	0.149231	0.678167
contamination	outbred	CEU	pmd-mask	10%	AFR	0.10X	READv2	1°	0.776667	1	1	0.230769	0.874296	1	0.937207	0.179231	0.179231	0.888333
contamination	outbred	CEU	pmd-mask	10%	AFR	0.10X	READv2	S	1	1	1	0.0769231	1	1	1	0.0769231	0.0769231	1
contamination	outbred	CEU	pmd-mask	1%	GBR	0.10X	correctKin	U	1	0.936	0.824176	0.230769	0.903614	0.824176	1	0.230769	0.28	0.968
contamination	outbred	CEU	pmd-mask	1%	GBR	0.10X	correctKin	3°	0.743333	0.969	0.877953	0.230769	0.805054	0.877953	0.926386	0.171538	0.195385	0.856167
contamination	outbred	CEU	pmd-mask	1%	GBR	0.10X	correctKin	2°	0.896667	0.987	0.953901	0.230769	0.924399	0.953901	0.969548	0.206923	0.216923	0.941833
contamination	outbred	CEU	pmd-mask	1%	GBR	0.10X	correctKin	1°	1	1	1	0.230769	1	1	1	0.230769	0.230769	1
contamination	outbred	CEU	pmd-mask	1%	GBR	0.10X	correctKin	S	1	1	1	0.0769231	1	1	1	0.0769231	0.0769231	1
contamination	outbred	CEU	pmd-mask	1%	GBR	0.10X	GRUPS	U	0.97	0.976	0.92381	0.230769	0.946341	0.92381	0.990863	0.223846	0.242308	0.973
contamination	outbred	CEU	pmd-mask	1%	GBR	0.10X	GRUPS	3°	0.89	0.952	0.847619	0.230769	0.868293	0.847619	0.966497	0.205385	0.242308	0.921
contamination	outbred	CEU	pmd-mask	1%	GBR	0.10X	GRUPS	2°	0.87	0.988	0.956044	0.230769	0.910995	0.956044	0.962025	0.200769	0.21	0.929
contamination	outbred	CEU	pmd-mask	1%	GBR	0.10X	GRUPS	1°	0.99	1	1	0.230769	0.994975	1	0.997009	0.228462	0.228462	0.995
contamination	outbred	CEU	pmd-mask	1%	GBR	0.10X	GRUPS	S	1	1	1	0.0769231	1	1	1	0.0769231	0.0769231	1
contamination	outbred	CEU	pmd-mask	1%	GBR	0.10X	TKGWV2	U	1	0.833	0.642398	0.230769	0.782269	0.642398	1	0.230769	0.359231	0.9165
contamination	outbred	CEU	pmd-mask	1%	GBR	0.10X	TKGWV2	3°	0	1	N/A	0.230769	N/A	N/A	0.769231	0	0	0.5
contamination	outbred	CEU	pmd-mask	1%	GBR	0.10X	TKGWV2	2°	1	0.866	0.691244	0.230769	0.817439	0.691244	1	0.230769	0.333846	0.933
contamination	outbred	CEU	pmd-mask	1%	GBR	0.10X	TKGWV2	1°	0.996667	1	1	0.230769	0.998331	1	0.999001	0.23	0.23	0.998333
contamination	outbred	CEU	pmd-mask	1%	GBR	0.10X	TKGWV2	S	1	1	1	0.0769231	1	1	1	0.0769231	0.0769231	1
contamination	outbred	CEU	pmd-mask	1%	GBR	0.10X	KIN	U	1	0.776	0.572519	0.230769	0.728155	0.572519	1	0.230769	0.403077	0.888
contamination	outbred	CEU	pmd-mask	1%	GBR	0.10X	KIN	3°	0.266667	0.909	0.467836	0.230769	0.339703	0.467836	0.805137	0.0615385	0.131538	0.587833
contamination	outbred	CEU	pmd-mask	1%	GBR	0.10X	KIN	2°	0.676667	0.985	0.931193	0.230769	0.783784	0.931193	0.910351	0.156154	0.167692	0.830833
contamination	outbred	CEU	pmd-mask	1%	GBR	0.10X	KIN	1°	0.956667	1	1	0.230769	0.977853	1	0.987167	0.220769	0.220769	0.978333
contamination	outbred	CEU	pmd-mask	1%	GBR	0.10X	KIN	S	1	1	1	0.0769231	1	1	1	0.0769231	0.0769231	1
contamination	outbred	CEU	pmd-mask	1%	GBR	0.10X	READv2	U	1	0.592	0.423729	0.230769	0.595238	0.423729	1	0.230769	0.544615	0.796
contamination	outbred	CEU	pmd-mask	1%	GBR	0.10X	READv2	3°	0	1	N/A	0.230769	N/A	N/A	0.769231	0	0	0.5
contamination	outbred	CEU	pmd-mask	1%	GBR	0.10X	READv2	2°	0.636667	0.986	0.931707	0.230769	0.756436	0.931707	0.900457	0.146923	0.157692	0.811333
contamination	outbred	CEU	pmd-mask	1%	GBR	0.10X	READv2	1°	0.956667	1	1	0.230769	0.977853	1	0.987167	0.220769	0.220769	0.978333
contamination	outbred	CEU	pmd-mask	1%	GBR	0.10X	READv2	S	1	1	1	0.0769231	1	1	1	0.0769231	0.0769231	1
contamination	outbred	CEU	pmd-mask	2%	GBR	0.10X	correctKin	U	1	0.935	0.821918	0.230769	0.902256	0.821918	1	0.230769	0.280769	0.9675
contamination	outbred	CEU	pmd-mask	2%	GBR	0.10X	correctKin	3°	0.753333	0.965	0.8659	0.230769	0.805704	0.8659	0.928778	0.173846	0.200769	0.859167
contamination	outbred	CEU	pmd-mask	2%	GBR	0.10X	correctKin	2°	0.883333	0.989	0.960145	0.230769	0.920139	0.960145	0.96582	0.203846	0.212308	0.936167
contamination	outbred	CEU	pmd-mask	2%	GBR	0.10X	correctKin	1°	0.993333	1	1	0.230769	0.996656	1	0.998004	0.229231	0.229231	0.996667
contamination	outbred	CEU	pmd-mask	2%	GBR	0.10X	correctKin	S	1	1	1	0.0769231	1	1	1	0.0769231	0.0769231	1
contamination	outbred	CEU	pmd-mask	2%	GBR	0.10X	GRUPS	U	0.953333	0.971	0.907937	0.230769	0.930081	0.907937	0.985787	0.22	0.242308	0.962167
contamination	outbred	CEU	pmd-mask	2%	GBR	0.10X	GRUPS	3°	0.886667	0.936	0.806061	0.230769	0.844444	0.806061	0.964948	0.204615	0.253846	0.911333
contamination	outbred	CEU	pmd-mask	2%	GBR	0.10X	GRUPS	2°	0.833333	0.991	0.965251	0.230769	0.894454	0.965251	0.951969	0.192308	0.199231	0.912167
contamination	outbred	CEU	pmd-mask	2%	GBR	0.10X	GRUPS	1°	0.986667	1	1	0.230769	0.993289	1	0.996016	0.227692	0.227692	0.993333
contamination	outbred	CEU	pmd-mask	2%	GBR	0.10X	GRUPS	S	1	1	1	0.0769231	1	1	1	0.0769231	0.0769231	1
contamination	outbred	CEU	pmd-mask	2%	GBR	0.10X	TKGWV2	U	1	0.842	0.655022	0.230769	0.791557	0.655022	1	0.230769	0.352308	0.921
contamination	outbred	CEU	pmd-mask	2%	GBR	0.10X	TKGWV2	3°	0	1	N/A	0.230769	N/A	N/A	0.769231	0	0	0.5
contamination	outbred	CEU	pmd-mask	2%	GBR	0.10X	TKGWV2	2°	0.996667	0.854	0.67191	0.230769	0.802685	0.67191	0.99883	0.23	0.342308	0.925333
contamination	outbred	CEU	pmd-mask	2%	GBR	0.10X	TKGWV2	1°	0.99	1	1	0.230769	0.994975	1	0.997009	0.228462	0.228462	0.995
contamination	outbred	CEU	pmd-mask	2%	GBR	0.10X	TKGWV2	S	1	1	1	0.0769231	1	1	1	0.0769231	0.0769231	1
contamination	outbred	CEU	pmd-mask	2%	GBR	0.10X	KIN	U	1	0.801	0.601202	0.230769	0.750939	0.601202	1	0.230769	0.383846	0.9005
contamination	outbred	CEU	pmd-mask	2%	GBR	0.10X	KIN	3°	0.35	0.897	0.504808	0.230769	0.413386	0.504808	0.821429	0.0807692	0.16	0.6235
contamination	outbred	CEU	pmd-mask	2%	GBR	0.10X	KIN	2°	0.643333	0.97	0.865471	0.230769	0.73805	0.865471	0.90065	0.148462	0.171538	0.806667
contamination	outbred	CEU	pmd-mask	2%	GBR	0.10X	KIN	1°	0.9	1	1	0.230769	0.947368	1	0.970874	0.207692	0.207692	0.95
contamination	outbred	CEU	pmd-mask	2%	GBR	0.10X	KIN	S	1	1	1	0.0769231	1	1	1	0.0769231	0.0769231	1
contamination	outbred	CEU	pmd-mask	2%	GBR	0.10X	READv2	U	1	0.573	0.412655	0.230769	0.584226	0.412655	1	0.230769	0.559231	0.7865
contamination	outbred	CEU	pmd-mask	2%	GBR	0.10X	READv2	3°	0	1	N/A	0.230769	N/A	N/A	0.769231	0	0	0.5
contamination	outbred	CEU	pmd-mask	2%	GBR	0.10X	READv2	2°	0.57	0.976	0.876923	0.230769	0.690909	0.876923	0.883258	0.131538	0.15	0.773
contamination	outbred	CEU	pmd-mask	2%	GBR	0.10X	READv2	1°	0.926667	1	1	0.230769	0.961938	1	0.978474	0.213846	0.213846	0.963333
contamination	outbred	CEU	pmd-mask	2%	GBR	0.10X	READv2	S	1	1	1	0.0769231	1	1	1	0.0769231	0.0769231	1
contamination	outbred	CEU	pmd-mask	3%	GBR	0.10X	correctKin	U	1	0.929	0.808625	0.230769	0.894188	0.808625	1	0.230769	0.285385	0.9645
contamination	outbred	CEU	pmd-mask	3%	GBR	0.10X	correctKin	3°	0.746667	0.959	0.845283	0.230769	0.79292	0.845283	0.92657	0.172308	0.203846	0.852833
contamination	outbred	CEU	pmd-mask	3%	GBR	0.10X	correctKin	2°	0.863333	0.99	0.962825	0.230769	0.910369	0.962825	0.960233	0.199231	0.206923	0.926667
contamination	outbred	CEU	pmd-mask	3%	GBR	0.10X	correctKin	1°	0.983333	1	1	0.230769	0.991597	1	0.995025	0.226923	0.226923	0.991667
contamination	outbred	CEU	pmd-mask	3%	GBR	0.10X	correctKin	S	1	1	1	0.0769231	1	1	1	0.0769231	0.0769231	1
contamination	outbred	CEU	pmd-mask	3%	GBR	0.10X	GRUPS	U	0.97	0.976	0.92381	0.230769	0.946341	0.92381	0.990863	0.223846	0.242308	0.973
contamination	outbred	CEU	pmd-mask	3%	GBR	0.10X	GRUPS	3°	0.893333	0.937	0.809668	0.230769	0.849445	0.809668	0.966976	0.206154	0.254615	0.915167
contamination	outbred	CEU	pmd-mask	3%	GBR	0.10X	GRUPS	2°	0.816667	0.988	0.953307	0.230769	0.879713	0.953307	0.947267	0.188462	0.197692	0.902333
contamination	outbred	CEU	pmd-mask	3%	GBR	0.10X	GRUPS	1°	0.986667	0.999	0.996633	0.230769	0.991625	0.996633	0.996012	0.227692	0.228462	0.992833
contamination	outbred	CEU	pmd-mask	3%	GBR	0.10X	GRUPS	S	1	1	1	0.0769231	1	1	1	0.0769231	0.0769231	1
contamination	outbred	CEU	pmd-mask	3%	GBR	0.10X	TKGWV2	U	1	0.818	0.622407	0.230769	0.767263	0.622407	1	0.230769	0.370769	0.909
contamination	outbred	CEU	pmd-mask	3%	GBR	0.10X	TKGWV2	3°	0	1	N/A	0.230769	N/A	N/A	0.769231	0	0	0.5
contamination	outbred	CEU	pmd-mask	3%	GBR	0.10X	TKGWV2	2°	0.99	0.877	0.707143	0.230769	0.825	0.707143	0.996591	0.228462	0.323077	0.9335
contamination	outbred	CEU	pmd-mask	3%	GBR	0.10X	TKGWV2	1°	0.993333	1	1	0.230769	0.996656	1	0.998004	0.229231	0.229231	0.996667
contamination	outbred	CEU	pmd-mask	3%	GBR	0.10X	TKGWV2	S	1	1	1	0.0769231	1	1	1	0.0769231	0.0769231	1
contamination	outbred	CEU	pmd-mask	3%	GBR	0.10X	KIN	U	1	0.771	0.567108	0.230769	0.723764	0.567108	1	0.230769	0.406923	0.8855
contamination	outbred	CEU	pmd-mask	3%	GBR	0.10X	KIN	3°	0.256667	0.888	0.407407	0.230769	0.314928	0.407407	0.79928	0.0592308	0.145385	0.572333
contamination	outbred	CEU	pmd-mask	3%	GBR	0.10X	KIN	2°	0.603333	0.962	0.826484	0.230769	0.697495	0.826484	0.889917	0.139231	0.168462	0.782667
contamination	outbred	CEU	pmd-mask	3%	GBR	0.10X	KIN	1°	0.876667	1	1	0.230769	0.934281	1	0.96432	0.202308	0.202308	0.938333
contamination	outbred	CEU	pmd-mask	3%	GBR	0.10X	KIN	S	1	1	1	0.0769231	1	1	1	0.0769231	0.0769231	1
contamination	outbred	CEU	pmd-mask	3%	GBR	0.10X	READv2	U	1	0.581	0.417246	0.230769	0.588813	0.417246	1	0.230769	0.553077	0.7905
contamination	outbred	CEU	pmd-mask	3%	GBR	0.10X	READv2	3°	0	1	N/A	0.230769	N/A	N/A	0.769231	0	0	0.5
contamination	outbred	CEU	pmd-mask	3%	GBR	0.10X	READv2	2°	0.603333	0.97	0.85782	0.230769	0.708415	0.85782	0.890725	0.139231	0.162308	0.786667
contamination	outbred	CEU	pmd-mask	3%	GBR	0.10X	READv2	1°	0.9	1	1	0.230769	0.947368	1	0.970874	0.207692	0.207692	0.95
contamination	outbred	CEU	pmd-mask	3%	GBR	0.10X	READv2	S	1	1	1	0.0769231	1	1	1	0.0769231	0.0769231	1
contamination	outbred	CEU	pmd-mask	4%	GBR	0.10X	correctKin	U	0.99697	0.924545	0.798544	0.230769	0.886792	0.798544	0.999018	0.23007	0.288112	0.960758
contamination	outbred	CEU	pmd-mask	4%	GBR	0.10X	correctKin	3°	0.721212	0.954545	0.826389	0.230769	0.770227	0.826389	0.91944	0.166434	0.201399	0.837879
contamination	outbred	CEU	pmd-mask	4%	GBR	0.10X	correctKin	2°	0.851515	0.982727	0.936667	0.230769	0.892063	0.936667	0.956637	0.196503	0.20979	0.917121
contamination	outbred	CEU	pmd-mask	4%	GBR	0.10X	correctKin	1°	0.969697	1	1	0.230769	0.984615	1	0.990991	0.223776	0.223776	0.984848
contamination	outbred	CEU	pmd-mask	4%	GBR	0.10X	correctKin	S	1	1	1	0.0769231	1	1	1	0.0769231	0.0769231	1
contamination	outbred	CEU	pmd-mask	4%	GBR	0.10X	GRUPS	U	0.963636	0.974545	0.919075	0.230769	0.940828	0.919075	0.98893	0.222378	0.241958	0.969091
contamination	outbred	CEU	pmd-mask	4%	GBR	0.10X	GRUPS	3°	0.893939	0.924545	0.780423	0.230769	0.833333	0.780423	0.96673	0.206294	0.264336	0.909242
contamination	outbred	CEU	pmd-mask	4%	GBR	0.10X	GRUPS	2°	0.784848	0.987273	0.948718	0.230769	0.859038	0.948718	0.938634	0.181119	0.190909	0.886061
contamination	outbred	CEU	pmd-mask	4%	GBR	0.10X	GRUPS	1°	0.978788	1	1	0.230769	0.98928	1	0.993677	0.225874	0.225874	0.989394
contamination	outbred	CEU	pmd-mask	4%	GBR	0.10X	GRUPS	S	1	1	1	0.0769231	1	1	1	0.0769231	0.0769231	1
contamination	outbred	CEU	pmd-mask	4%	GBR	0.10X	TKGWV2	U	1	0.818182	0.622642	0.230769	0.767442	0.622642	1	0.230769	0.370629	0.909091
contamination	outbred	CEU	pmd-mask	4%	GBR	0.10X	TKGWV2	3°	0	1	N/A	0.230769	N/A	N/A	0.769231	0	0	0.5
contamination	outbred	CEU	pmd-mask	4%	GBR	0.10X	TKGWV2	2°	0.99697	0.876364	0.707527	0.230769	0.827673	0.707527	0.998964	0.23007	0.325175	0.936667
contamination	outbred	CEU	pmd-mask	4%	GBR	0.10X	TKGWV2	1°	0.981818	0.999091	0.996923	0.230769	0.989313	0.996923	0.99457	0.226573	0.227273	0.990455
contamination	outbred	CEU	pmd-mask	4%	GBR	0.10X	TKGWV2	S	1	1	1	0.0769231	1	1	1	0.0769231	0.0769231	1
contamination	outbred	CEU	pmd-mask	4%	GBR	0.10X	KIN	U	1	0.765455	0.561224	0.230769	0.718954	0.561224	1	0.230769	0.411189	0.882727
contamination	outbred	CEU	pmd-mask	4%	GBR	0.10X	KIN	3°	0.239394	0.880909	0.37619	0.230769	0.292593	0.37619	0.794262	0.0552448	0.146853	0.560152
contamination	outbred	CEU	pmd-mask	4%	GBR	0.10X	KIN	2°	0.575758	0.955455	0.794979	0.230769	0.667838	0.794979	0.882452	0.132867	0.167133	0.765606
contamination	outbred	CEU	pmd-mask	4%	GBR	0.10X	KIN	1°	0.857576	0.999091	0.996479	0.230769	0.921824	0.996479	0.958988	0.197902	0.198601	0.928333
contamination	outbred	CEU	pmd-mask	4%	GBR	0.10X	KIN	S	0.990909	1	1	0.0769231	0.995434	1	0.999243	0.0762238	0.0762238	0.995455
contamination	outbred	CEU	pmd-mask	4%	GBR	0.10X	READv2	U	1	0.571818	0.411985	0.230769	0.583554	0.411985	1	0.230769	0.56014	0.785909
contamination	outbred	CEU	pmd-mask	4%	GBR	0.10X	READv2	3°	0	1	N/A	0.230769	N/A	N/A	0.769231	0	0	0.5
contamination	outbred	CEU	pmd-mask	4%	GBR	0.10X	READv2	2°	0.566667	0.956364	0.795745	0.230769	0.661947	0.795745	0.880335	0.130769	0.164336	0.761515
contamination	outbred	CEU	pmd-mask	4%	GBR	0.10X	READv2	1°	0.860606	1	1	0.230769	0.925081	1	0.95986	0.198601	0.198601	0.930303
contamination	outbred	CEU	pmd-mask	4%	GBR	0.10X	READv2	S	1	1	1	0.0769231	1	1	1	0.0769231	0.0769231	1
contamination	outbred	CEU	pmd-mask	5%	GBR	0.10X	correctKin	U	1	0.91	0.769231	0.230769	0.869565	0.769231	1	0.230769	0.3	0.955
contamination	outbred	CEU	pmd-mask	5%	GBR	0.10X	correctKin	3°	0.686667	0.956	0.824	0.230769	0.749091	0.824	0.910476	0.158462	0.192308	0.821333
contamination	outbred	CEU	pmd-mask	5%	GBR	0.10X	correctKin	2°	0.853333	0.987	0.951673	0.230769	0.899824	0.951673	0.957323	0.196923	0.206923	0.920167
contamination	outbred	CEU	pmd-mask	5%	GBR	0.10X	correctKin	1°	0.97	1	1	0.230769	0.984772	1	0.99108	0.223846	0.223846	0.985
contamination	outbred	CEU	pmd-mask	5%	GBR	0.10X	correctKin	S	1	1	1	0.0769231	1	1	1	0.0769231	0.0769231	1
contamination	outbred	CEU	pmd-mask	5%	GBR	0.10X	GRUPS	U	0.973333	0.962	0.884848	0.230769	0.926984	0.884848	0.991753	0.224615	0.253846	0.967667
contamination	outbred	CEU	pmd-mask	5%	GBR	0.10X	GRUPS	3°	0.863333	0.926	0.777778	0.230769	0.818325	0.777778	0.957601	0.199231	0.256154	0.894667
contamination	outbred	CEU	pmd-mask	5%	GBR	0.10X	GRUPS	2°	0.78	0.984	0.936	0.230769	0.850909	0.936	0.937143	0.18	0.192308	0.882
contamination	outbred	CEU	pmd-mask	5%	GBR	0.10X	GRUPS	1°	0.956667	1	1	0.230769	0.977853	1	0.987167	0.220769	0.220769	0.978333
contamination	outbred	CEU	pmd-mask	5%	GBR	0.10X	GRUPS	S	1	1	1	0.0769231	1	1	1	0.0769231	0.0769231	1
contamination	outbred	CEU	pmd-mask	5%	GBR	0.10X	TKGWV2	U	1	0.821	0.626305	0.230769	0.770218	0.626305	1	0.230769	0.368462	0.9105
contamination	outbred	CEU	pmd-mask	5%	GBR	0.10X	TKGWV2	3°	0	1	N/A	0.230769	N/A	N/A	0.769231	0	0	0.5
contamination	outbred	CEU	pmd-mask	5%	GBR	0.10X	TKGWV2	2°	0.993333	0.872	0.699531	0.230769	0.820937	0.699531	0.997712	0.229231	0.327692	0.932667
contamination	outbred	CEU	pmd-mask	5%	GBR	0.10X	TKGWV2	1°	0.983333	1	1	0.230769	0.991597	1	0.995025	0.226923	0.226923	0.991667
contamination	outbred	CEU	pmd-mask	5%	GBR	0.10X	TKGWV2	S	1	1	1	0.0769231	1	1	1	0.0769231	0.0769231	1
contamination	outbred	CEU	pmd-mask	5%	GBR	0.10X	KIN	U	1	0.767	0.562852	0.230769	0.720288	0.562852	1	0.230769	0.41	0.8835
contamination	outbred	CEU	pmd-mask	5%	GBR	0.10X	KIN	3°	0.233333	0.87	0.35	0.230769	0.28	0.35	0.790909	0.0538462	0.153846	0.551667
contamination	outbred	CEU	pmd-mask	5%	GBR	0.10X	KIN	2°	0.55	0.92	0.673469	0.230769	0.605505	0.673469	0.872038	0.126923	0.188462	0.735
contamination	outbred	CEU	pmd-mask	5%	GBR	0.10X	KIN	1°	0.74	0.999	0.995516	0.230769	0.848948	0.995516	0.927577	0.170769	0.171538	0.8695
contamination	outbred	CEU	pmd-mask	5%	GBR	0.10X	KIN	S	0.99	1	1	0.0769231	0.994975	1	0.999167	0.0761538	0.0761538	0.995
contamination	outbred	CEU	pmd-mask	5%	GBR	0.10X	READv2	U	1	0.551	0.400534	0.230769	0.571973	0.400534	1	0.230769	0.576154	0.7755
contamination	outbred	CEU	pmd-mask	5%	GBR	0.10X	READv2	3°	0	1	N/A	0.230769	N/A	N/A	0.769231	0	0	0.5
contamination	outbred	CEU	pmd-mask	5%	GBR	0.10X	READv2	2°	0.496667	0.93	0.680365	0.230769	0.574181	0.680365	0.860315	0.114615	0.168462	0.713333
contamination	outbred	CEU	pmd-mask	5%	GBR	0.10X	READv2	1°	0.773333	1	1	0.230769	0.87218	1	0.93633	0.178462	0.178462	0.886667
contamination	outbred	CEU	pmd-mask	5%	GBR	0.10X	READv2	S	1	1	1	0.0769231	1	1	1	0.0769231	0.0769231	1
contamination	outbred	CEU	pmd-mask	10%	GBR	0.10X	correctKin	U	1	0.923	0.795756	0.230769	0.886263	0.795756	1	0.230769	0.29	0.9615
contamination	outbred	CEU	pmd-mask	10%	GBR	0.10X	correctKin	3°	0.733333	0.927	0.750853	0.230769	0.74199	0.750853	0.920556	0.169231	0.225385	0.830167
contamination	outbred	CEU	pmd-mask	10%	GBR	0.10X	correctKin	2°	0.756667	0.957	0.840741	0.230769	0.796491	0.840741	0.929126	0.174615	0.207692	0.856833
contamination	outbred	CEU	pmd-mask	10%	GBR	0.10X	correctKin	1°	0.866667	0.999	0.996169	0.230769	0.926916	0.996169	0.961501	0.2	0.200769	0.932833
contamination	outbred	CEU	pmd-mask	10%	GBR	0.10X	correctKin	S	0.99	1	1	0.0769231	0.994975	1	0.999167	0.0761538	0.0761538	0.995
contamination	outbred	CEU	pmd-mask	10%	GBR	0.10X	GRUPS	U	0.96	0.973	0.914286	0.230769	0.936585	0.914286	0.987817	0.221538	0.242308	0.9665
contamination	outbred	CEU	pmd-mask	10%	GBR	0.10X	GRUPS	3°	0.903333	0.887	0.705729	0.230769	0.792398	0.705729	0.968341	0.208462	0.295385	0.895167
contamination	outbred	CEU	pmd-mask	10%	GBR	0.10X	GRUPS	2°	0.663333	0.955	0.815574	0.230769	0.731618	0.815574	0.904356	0.153077	0.187692	0.809167
contamination	outbred	CEU	pmd-mask	10%	GBR	0.10X	GRUPS	1°	0.856667	0.988	0.95539	0.230769	0.903339	0.95539	0.958293	0.197692	0.206923	0.922333
contamination	outbred	CEU	pmd-mask	10%	GBR	0.10X	GRUPS	S	0.88	1	1	0.0769231	0.93617	1	0.990099	0.0676923	0.0676923	0.94
contamination	outbred	CEU	pmd-mask	10%	GBR	0.10X	TKGWV2	U	1	0.809	0.610998	0.230769	0.758534	0.610998	1	0.230769	0.377692	0.9045
contamination	outbred	CEU	pmd-mask	10%	GBR	0.10X	TKGWV2	3°	0	1	N/A	0.230769	N/A	N/A	0.769231	0	0	0.5
contamination	outbred	CEU	pmd-mask	10%	GBR	0.10X	TKGWV2	2°	0.993333	0.853	0.669663	0.230769	0.8	0.669663	0.997661	0.229231	0.342308	0.923167
contamination	outbred	CEU	pmd-mask	10%	GBR	0.10X	TKGWV2	1°	0.88	1	1	0.230769	0.93617	1	0.965251	0.203077	0.203077	0.94
contamination	outbred	CEU	pmd-mask	10%	GBR	0.10X	TKGWV2	S	1	1	1	0.0769231	1	1	1	0.0769231	0.0769231	1
contamination	outbred	CEU	pmd-mask	10%	GBR	0.10X	KIN	U	1	0.71	0.508475	0.230769	0.674157	0.508475	1	0.230769	0.453846	0.855
contamination	outbred	CEU	pmd-mask	10%	GBR	0.10X	KIN	3°	0.133333	0.832	0.192308	0.230769	0.15748	0.192308	0.761905	0.0307692	0.16	0.482667
contamination	outbred	CEU	pmd-mask	10%	GBR	0.10X	KIN	2°	0.34	0.83	0.375	0.230769	0.356643	0.375	0.807393	0.0784615	0.209231	0.585
contamination	outbred	CEU	pmd-mask	10%	GBR	0.10X	KIN	1°	0.433333	0.925	0.634146	0.230769	0.514851	0.634146	0.844749	0.1	0.157692	0.679167
contamination	outbred	CEU	pmd-mask	10%	GBR	0.10X	KIN	S	0.25	1	1	0.0769231	0.4	1	0.941176	0.0192308	0.0192308	0.625
contamination	outbred	CEU	pmd-mask	10%	GBR	0.10X	READv2	U	1	0.486	0.36855	0.230769	0.5386	0.36855	1	0.230769	0.626154	0.743
contamination	outbred	CEU	pmd-mask	10%	GBR	0.10X	READv2	3°	0	1	N/A	0.230769	N/A	N/A	0.769231	0	0	0.5
contamination	outbred	CEU	pmd-mask	10%	GBR	0.10X	READv2	2°	0.286667	0.843	0.353909	0.230769	0.316759	0.353909	0.79754	0.0661538	0.186923	0.564833
contamination	outbred	CEU	pmd-mask	10%	GBR	0.10X	READv2	1°	0.476667	0.978	0.866667	0.230769	0.615054	0.866667	0.861674	0.11	0.126923	0.727333
contamination	outbred	CEU	pmd-mask	10%	GBR	0.10X	READv2	S	0.78	1	1	0.0769231	0.876404	1	0.981997	0.06	0.06	0.89
inbreeding	inbred	CEU	pmd-mask	0%	N/A	all-inbred	correctKin	0	N/A	0.975556	0	0	N/A	N/A	N/A	0	0.0244444	N/A
inbreeding	inbred	CEU	pmd-mask	0%	N/A	all-inbred	correctKin	0.125	0.73	0.91125	0.506944	0.111111	0.598361	0.506944	0.964286	0.0811111	0.16	0.820625
inbreeding	inbred	CEU	pmd-mask	0%	N/A	all-inbred	correctKin	0.1875	0	1	N/A	0.111111	N/A	N/A	0.888889	0	0	0.5
inbreeding	inbred	CEU	pmd-mask	0%	N/A	all-inbred	correctKin	0.25	0.84	0.75875	0.303249	0.111111	0.445623	0.303249	0.974318	0.0933333	0.307778	0.799375
inbreeding	inbred	CEU	pmd-mask	0%	N/A	all-inbred	correctKin	0.3125	0	1	N/A	0.111111	N/A	N/A	0.888889	0	0	0.5
inbreeding	inbred	CEU	pmd-mask	0%	N/A	all-inbred	correctKin	0.375	0	1	N/A	0.111111	N/A	N/A	0.888889	0	0	0.5
inbreeding	inbred	CEU	pmd-mask	0%	N/A	all-inbred	correctKin	0.5	1	0.595	0.235849	0.111111	0.381679	0.235849	1	0.111111	0.471111	0.7975
inbreeding	inbred	CEU	pmd-mask	0%	N/A	all-inbred	correctKin	0.5625	0	1	N/A	0.111111	N/A	N/A	0.888889	0	0	0.5
inbreeding	inbred	CEU	pmd-mask	0%	N/A	all-inbred	correctKin	0.625	0	1	N/A	0.111111	N/A	N/A	0.888889	0	0	0.5
inbreeding	inbred	CEU	pmd-mask	0%	N/A	all-inbred	correctKin	0.75	0	1	N/A	0.111111	N/A	N/A	0.888889	0	0	0.5
inbreeding	inbred	CEU	pmd-mask	0%	N/A	all-inbred	correctKin	1	N/A	0.963333	0	0	N/A	N/A	N/A	0	0.0366667	N/A
inbreeding	inbred	CEU	pmd-mask	0%	N/A	all-inbred	GRUPS	0	N/A	0.994444	0	0	N/A	N/A	N/A	0	0.00555556	N/A
inbreeding	inbred	CEU	pmd-mask	0%	N/A	all-inbred	GRUPS	0.125	0.9	0.88875	0.502793	0.111111	0.645161	0.502793	0.98613	0.1	0.198889	0.894375
inbreeding	inbred	CEU	pmd-mask	0%	N/A	all-inbred	GRUPS	0.1875	0	1	N/A	0.111111	N/A	N/A	0.888889	0	0	0.5
inbreeding	inbred	CEU	pmd-mask	0%	N/A	all-inbred	GRUPS	0.25	0.73	0.7675	0.281853	0.111111	0.406685	0.281853	0.957878	0.0811111	0.287778	0.74875
inbreeding	inbred	CEU	pmd-mask	0%	N/A	all-inbred	GRUPS	0.3125	0	1	N/A	0.111111	N/A	N/A	0.888889	0	0	0.5
inbreeding	inbred	CEU	pmd-mask	0%	N/A	all-inbred	GRUPS	0.375	0	1	N/A	0.111111	N/A	N/A	0.888889	0	0	0.5
inbreeding	inbred	CEU	pmd-mask	0%	N/A	all-inbred	GRUPS	0.5	0.99	0.56625	0.221973	0.111111	0.362637	0.221973	0.997797	0.11	0.495556	0.778125
inbreeding	inbred	CEU	pmd-mask	0%	N/A	all-inbred	GRUPS	0.5625	0	1	N/A	0.111111	N/A	N/A	0.888889	0	0	0.5
inbreeding	inbred	CEU	pmd-mask	0%	N/A	all-inbred	GRUPS	0.625	0	1	N/A	0.111111	N/A	N/A	0.888889	0	0	0.5
inbreeding	inbred	CEU	pmd-mask	0%	N/A	all-inbred	GRUPS	0.75	0	1	N/A	0.111111	N/A	N/A	0.888889	0	0	0.5
inbreeding	inbred	CEU	pmd-mask	0%	N/A	all-inbred	GRUPS	1	N/A	0.987778	0	0	N/A	N/A	N/A	0	0.0122222	N/A
inbreeding	inbred	CEU	pmd-mask	0%	N/A	all-inbred	TKGWV2	0	N/A	0.928889	0	0	N/A	N/A	N/A	0	0.0711111	N/A
inbreeding	inbred	CEU	pmd-mask	0%	N/A	all-inbred	TKGWV2	0.125	0	1	N/A	0.111111	N/A	N/A	0.888889	0	0	0.5
inbreeding	inbred	CEU	pmd-mask	0%	N/A	all-inbred	TKGWV2	0.1875	0	1	N/A	0.111111	N/A	N/A	0.888889	0	0	0.5
inbreeding	inbred	CEU	pmd-mask	0%	N/A	all-inbred	TKGWV2	0.25	1	0.64875	0.262467	0.111111	0.4158	0.262467	1	0.111111	0.423333	0.824375
inbreeding	inbred	CEU	pmd-mask	0%	N/A	all-inbred	TKGWV2	0.3125	0	1	N/A	0.111111	N/A	N/A	0.888889	0	0	0.5
inbreeding	inbred	CEU	pmd-mask	0%	N/A	all-inbred	TKGWV2	0.375	0	1	N/A	0.111111	N/A	N/A	0.888889	0	0	0.5
inbreeding	inbred	CEU	pmd-mask	0%	N/A	all-inbred	TKGWV2	0.5	0.98	0.72625	0.309148	0.111111	0.470024	0.309148	0.996569	0.108889	0.352222	0.853125
inbreeding	inbred	CEU	pmd-mask	0%	N/A	all-inbred	TKGWV2	0.5625	0	1	N/A	0.111111	N/A	N/A	0.888889	0	0	0.5
inbreeding	inbred	CEU	pmd-mask	0%	N/A	all-inbred	TKGWV2	0.625	0	1	N/A	0.111111	N/A	N/A	0.888889	0	0	0.5
inbreeding	inbred	CEU	pmd-mask	0%	N/A	all-inbred	TKGWV2	0.75	0	1	N/A	0.111111	N/A	N/A	0.888889	0	0	0.5
inbreeding	inbred	CEU	pmd-mask	0%	N/A	all-inbred	TKGWV2	1	N/A	0.846667	0	0	N/A	N/A	N/A	0	0.153333	N/A
inbreeding	inbred	CEU	pmd-mask	0%	N/A	all-inbred	KIN	0	N/A	0.96	0	0	N/A	N/A	N/A	0	0.04	N/A
inbreeding	inbred	CEU	pmd-mask	0%	N/A	all-inbred	KIN	0.125	0.61	0.91875	0.484127	0.111111	0.539823	0.484127	0.949612	0.0677778	0.14	0.764375
inbreeding	inbred	CEU	pmd-mask	0%	N/A	all-inbred	KIN	0.1875	0	1	N/A	0.111111	N/A	N/A	0.888889	0	0	0.5
inbreeding	inbred	CEU	pmd-mask	0%	N/A	all-inbred	KIN	0.25	0.81	0.6825	0.241791	0.111111	0.372414	0.241791	0.966372	0.09	0.372222	0.74625
inbreeding	inbred	CEU	pmd-mask	0%	N/A	all-inbred	KIN	0.3125	0	1	N/A	0.111111	N/A	N/A	0.888889	0	0	0.5
inbreeding	inbred	CEU	pmd-mask	0%	N/A	all-inbred	KIN	0.375	0	1	N/A	0.111111	N/A	N/A	0.888889	0	0	0.5
inbreeding	inbred	CEU	pmd-mask	0%	N/A	all-inbred	KIN	0.5	0.76	0.5975	0.190955	0.111111	0.305221	0.190955	0.952191	0.0844444	0.442222	0.67875
inbreeding	inbred	CEU	pmd-mask	0%	N/A	all-inbred	KIN	0.5625	0	1	N/A	0.111111	N/A	N/A	0.888889	0	0	0.5
inbreeding	inbred	CEU	pmd-mask	0%	N/A	all-inbred	KIN	0.625	0	1	N/A	0.111111	N/A	N/A	0.888889	0	0	0.5
inbreeding	inbred	CEU	pmd-mask	0%	N/A	all-inbred	KIN	0.75	0	1	N/A	0.111111	N/A	N/A	0.888889	0	0	0.5
inbreeding	inbred	CEU	pmd-mask	0%	N/A	all-inbred	KIN	1	N/A	0.994444	0	0	N/A	N/A	N/A	0	0.00555556	N/A
inbreeding	inbred	CEU	pmd-mask	0%	N/A	all-inbred	READv2	0	N/A	0.745556	0	0	N/A	N/A	N/A	0	0.254444	N/A
inbreeding	inbred	CEU	pmd-mask	0%	N/A	all-inbred	READv2	0.125	0	1	N/A	0.111111	N/A	N/A	0.888889	0	0	0.5
inbreeding	inbred	CEU	pmd-mask	0%	N/A	all-inbred	READv2	0.1875	0	1	N/A	0.111111	N/A	N/A	0.888889	0	0	0.5
inbreeding	inbred	CEU	pmd-mask	0%	N/A	all-inbred	READv2	0.25	0.55	0.75625	0.22	0.111111	0.314286	0.22	0.930769	0.0611111	0.277778	0.653125
inbreeding	inbred	CEU	pmd-mask	0%	N/A	all-inbred	READv2	0.3125	0	1	N/A	0.111111	N/A	N/A	0.888889	0	0	0.5
inbreeding	inbred	CEU	pmd-mask	0%	N/A	all-inbred	READv2	0.375	0	1	N/A	0.111111	N/A	N/A	0.888889	0	0	0.5
inbreeding	inbred	CEU	pmd-mask	0%	N/A	all-inbred	READv2	0.5	0.97	0.61	0.237164	0.111111	0.381139	0.237164	0.99389	0.107778	0.454444	0.79
inbreeding	inbred	CEU	pmd-mask	0%	N/A	all-inbred	READv2	0.5625	0	1	N/A	0.111111	N/A	N/A	0.888889	0	0	0.5
inbreeding	inbred	CEU	pmd-mask	0%	N/A	all-inbred	READv2	0.625	0	1	N/A	0.111111	N/A	N/A	0.888889	0	0	0.5
inbreeding	inbred	CEU	pmd-mask	0%	N/A	all-inbred	READv2	0.75	0	1	N/A	0.111111	N/A	N/A	0.888889	0	0	0.5
inbreeding	inbred	CEU	pmd-mask	0%	N/A	all-inbred	READv2	1	N/A	0.986667	0	0	N/A	N/A	N/A	0	0.0133333	N/A

## Sheet: S4
# Supplementary Table S4: Average pairwise SNP overlap reported by the correctKin, GRUPS-rs, TKGWV2 and READv2 methods, across the benchmark parameter space.
# analysis: label of the analysis conducted
# pedigree: label of the pedigree used
# population: label of the reference population for founder individuals
# pmd-rescaler: name of the PMD rescaling / masking method applied
# contamination: rate of modern human contamination
# contam.pop: label of the population used as a source for contaminants
# depth: average simulated sequencing depth (gargammel)
# method: method considered
# average.overlap: average pairwise SNP overlap for the considered analysis and method
analysis	pedigree	population	pmd-rescaler	contamination	contam.pop	depth	method	Average.overlap
coverage	outbred	CEU	pmd-mask	0	N/A	0.02X	correctKin	331.987
coverage	outbred	CEU	pmd-mask	0	N/A	0.02X	GRUPS-rs	334.264
coverage	outbred	CEU	pmd-mask	0	N/A	0.02X	TKGWV2	288.303
coverage	outbred	CEU	pmd-mask	0	N/A	0.02X	READv2	327.308
coverage	outbred	CEU	pmd-mask	0	N/A	0.04X	correctKin	1378.77
coverage	outbred	CEU	pmd-mask	0	N/A	0.04X	GRUPS-rs	1386.99
coverage	outbred	CEU	pmd-mask	0	N/A	0.04X	TKGWV2	1196.69
coverage	outbred	CEU	pmd-mask	0	N/A	0.04X	READv2	1359.34
coverage	outbred	CEU	pmd-mask	0	N/A	0.06X	correctKin	3031.75
coverage	outbred	CEU	pmd-mask	0	N/A	0.06X	GRUPS-rs	3053.6
coverage	outbred	CEU	pmd-mask	0	N/A	0.06X	TKGWV2	2633.57
coverage	outbred	CEU	pmd-mask	0	N/A	0.06X	READv2	2990.48
coverage	outbred	CEU	pmd-mask	0	N/A	0.08X	correctKin	5286.79
coverage	outbred	CEU	pmd-mask	0	N/A	0.08X	GRUPS-rs	5325.25
coverage	outbred	CEU	pmd-mask	0	N/A	0.08X	TKGWV2	4592.05
coverage	outbred	CEU	pmd-mask	0	N/A	0.08X	READv2	5214.64
coverage	outbred	CEU	pmd-mask	0	N/A	0.10X	correctKin	7949.42
coverage	outbred	CEU	pmd-mask	0	N/A	0.10X	GRUPS-rs	8008.13
coverage	outbred	CEU	pmd-mask	0	N/A	0.10X	TKGWV2	6907.33
coverage	outbred	CEU	pmd-mask	0	N/A	0.10X	READv2	7841.27
coverage	outbred	CEU	pmd-mask	0	N/A	0.20X	correctKin	29489.9
coverage	outbred	CEU	pmd-mask	0	N/A	0.20X	GRUPS-rs	29761.7
coverage	outbred	CEU	pmd-mask	0	N/A	0.20X	TKGWV2	25655.7
coverage	outbred	CEU	pmd-mask	0	N/A	0.20X	READv2	29100.1
coverage	outbred	CEU	pmd-mask	0	N/A	0.50X	correctKin	140235
coverage	outbred	CEU	pmd-mask	0	N/A	0.50X	GRUPS-rs	142198
coverage	outbred	CEU	pmd-mask	0	N/A	0.50X	TKGWV2	121523
coverage	outbred	CEU	pmd-mask	0	N/A	0.50X	READv2	138536
coverage	outbred	CEU	pmd-mask	0	N/A	1.00X	correctKin	373004
coverage	outbred	CEU	pmd-mask	0	N/A	1.00X	GRUPS-rs	380691
coverage	outbred	CEU	pmd-mask	0	N/A	1.00X	TKGWV2	326045
coverage	outbred	CEU	pmd-mask	0	N/A	1.00X	READv2	368923
pmd-rescaling	outbred	CEU	mapDamage2	0	N/A	0.02X	correctKin	414.974
pmd-rescaling	outbred	CEU	mapDamage2	0	N/A	0.02X	GRUPS-rs	431.657
pmd-rescaling	outbred	CEU	mapDamage2	0	N/A	0.02X	TKGWV2	364.449
pmd-rescaling	outbred	CEU	mapDamage2	0	N/A	0.02X	READv2	418.091
pmd-rescaling	outbred	CEU	mapDamage2	0	N/A	0.04X	correctKin	1732.37
pmd-rescaling	outbred	CEU	mapDamage2	0	N/A	0.04X	GRUPS-rs	1801.96
pmd-rescaling	outbred	CEU	mapDamage2	0	N/A	0.04X	TKGWV2	1522.3
pmd-rescaling	outbred	CEU	mapDamage2	0	N/A	0.04X	READv2	1745.87
pmd-rescaling	outbred	CEU	mapDamage2	0	N/A	0.06X	correctKin	3817.12
pmd-rescaling	outbred	CEU	mapDamage2	0	N/A	0.06X	GRUPS-rs	3972.34
pmd-rescaling	outbred	CEU	mapDamage2	0	N/A	0.06X	TKGWV2	3354.89
pmd-rescaling	outbred	CEU	mapDamage2	0	N/A	0.06X	READv2	3846.71
pmd-rescaling	outbred	CEU	mapDamage2	0	N/A	0.08X	correctKin	6652.61
pmd-rescaling	outbred	CEU	mapDamage2	0	N/A	0.08X	GRUPS-rs	6923.97
pmd-rescaling	outbred	CEU	mapDamage2	0	N/A	0.08X	TKGWV2	5847.55
pmd-rescaling	outbred	CEU	mapDamage2	0	N/A	0.08X	READv2	6704.11
pmd-rescaling	outbred	CEU	mapDamage2	0	N/A	0.10X	correctKin	9994.74
pmd-rescaling	outbred	CEU	mapDamage2	0	N/A	0.10X	GRUPS-rs	10403.9
pmd-rescaling	outbred	CEU	mapDamage2	0	N/A	0.10X	TKGWV2	8787.38
pmd-rescaling	outbred	CEU	mapDamage2	0	N/A	0.10X	READv2	10073.5
pmd-rescaling	outbred	CEU	mapDamage2	0	N/A	0.20X	correctKin	36863.7
pmd-rescaling	outbred	CEU	mapDamage2	0	N/A	0.20X	GRUPS-rs	38393.7
pmd-rescaling	outbred	CEU	mapDamage2	0	N/A	0.20X	TKGWV2	32432.9
pmd-rescaling	outbred	CEU	mapDamage2	0	N/A	0.20X	READv2	37131.6
pmd-rescaling	outbred	CEU	mapDamage2	0	N/A	0.50X	correctKin	171494
pmd-rescaling	outbred	CEU	mapDamage2	0	N/A	0.50X	GRUPS-rs	178808
pmd-rescaling	outbred	CEU	mapDamage2	0	N/A	0.50X	TKGWV2	150914
pmd-rescaling	outbred	CEU	mapDamage2	0	N/A	0.50X	READv2	172479
pmd-rescaling	outbred	CEU	mapDamage2	0	N/A	1.00X	correctKin	439932
pmd-rescaling	outbred	CEU	mapDamage2	0	N/A	1.00X	GRUPS-rs	459239
pmd-rescaling	outbred	CEU	mapDamage2	0	N/A	1.00X	TKGWV2	392134
pmd-rescaling	outbred	CEU	mapDamage2	0	N/A	1.00X	READv2	441315
admixture	outbred	ASW	pmd-mask	0	N/A	0.02X	correctKin	353.642
admixture	outbred	ASW	pmd-mask	0	N/A	0.02X	GRUPS-rs	356.009
admixture	outbred	ASW	pmd-mask	0	N/A	0.02X	TKGWV2	306.844
admixture	outbred	ASW	pmd-mask	0	N/A	0.02X	READv2	348.592
admixture	outbred	ASW	pmd-mask	0	N/A	0.04X	correctKin	1375.42
admixture	outbred	ASW	pmd-mask	0	N/A	0.04X	GRUPS-rs	1384.13
admixture	outbred	ASW	pmd-mask	0	N/A	0.04X	TKGWV2	1193.95
admixture	outbred	ASW	pmd-mask	0	N/A	0.04X	READv2	1356.11
admixture	outbred	ASW	pmd-mask	0	N/A	0.06X	correctKin	3027.63
admixture	outbred	ASW	pmd-mask	0	N/A	0.06X	GRUPS-rs	3048.32
admixture	outbred	ASW	pmd-mask	0	N/A	0.06X	TKGWV2	2628.18
admixture	outbred	ASW	pmd-mask	0	N/A	0.06X	READv2	2985.57
admixture	outbred	ASW	pmd-mask	0	N/A	0.08X	correctKin	5280.15
admixture	outbred	ASW	pmd-mask	0	N/A	0.08X	GRUPS-rs	5314.83
admixture	outbred	ASW	pmd-mask	0	N/A	0.08X	TKGWV2	4584.22
admixture	outbred	ASW	pmd-mask	0	N/A	0.08X	READv2	5204.12
admixture	outbred	ASW	pmd-mask	0	N/A	0.10X	correctKin	8082.58
admixture	outbred	ASW	pmd-mask	0	N/A	0.10X	GRUPS-rs	8140.13
admixture	outbred	ASW	pmd-mask	0	N/A	0.10X	TKGWV2	7021.66
admixture	outbred	ASW	pmd-mask	0	N/A	0.10X	READv2	7969.93
admixture	outbred	ASW	pmd-mask	0	N/A	0.20X	correctKin	29228.8
admixture	outbred	ASW	pmd-mask	0	N/A	0.20X	GRUPS-rs	29490.7
admixture	outbred	ASW	pmd-mask	0	N/A	0.20X	TKGWV2	25419.4
admixture	outbred	ASW	pmd-mask	0	N/A	0.20X	READv2	28837
admixture	outbred	ASW	pmd-mask	0	N/A	0.50X	correctKin	139457
admixture	outbred	ASW	pmd-mask	0	N/A	0.50X	GRUPS-rs	141328
admixture	outbred	ASW	pmd-mask	0	N/A	0.50X	TKGWV2	121666
admixture	outbred	ASW	pmd-mask	0	N/A	0.50X	READv2	137703
admixture	outbred	ASW	pmd-mask	0	N/A	1.00X	correctKin	373797
admixture	outbred	ASW	pmd-mask	0	N/A	1.00X	GRUPS-rs	381070
admixture	outbred	ASW	pmd-mask	0	N/A	1.00X	TKGWV2	327293
admixture	outbred	ASW	pmd-mask	0	N/A	1.00X	READv2	369299
admixture	outbred	PUR	pmd-mask	0	N/A	0.10X	correctKin	7971.12
admixture	outbred	PUR	pmd-mask	0	N/A	0.10X	GRUPS-rs	8038.8
admixture	outbred	PUR	pmd-mask	0	N/A	0.10X	TKGWV2	6931.05
admixture	outbred	PUR	pmd-mask	0	N/A	0.10X	READv2	7869
admixture	outbred	CLM	pmd-mask	0	N/A	0.10X	correctKin	7968.51
admixture	outbred	CLM	pmd-mask	0	N/A	0.10X	GRUPS-rs	8035.87
admixture	outbred	CLM	pmd-mask	0	N/A	0.10X	TKGWV2	6929.56
admixture	outbred	CLM	pmd-mask	0	N/A	0.10X	READv2	7867.51
admixture	outbred	MXL	pmd-mask	0	N/A	0.10X	correctKin	7958.82
admixture	outbred	MXL	pmd-mask	0	N/A	0.10X	GRUPS-rs	8023.85
admixture	outbred	MXL	pmd-mask	0	N/A	0.10X	TKGWV2	6919.29
admixture	outbred	MXL	pmd-mask	0	N/A	0.10X	READv2	7856.38
admixture	outbred	PEL	pmd-mask	0	N/A	0.10X	correctKin	8002.49
admixture	outbred	PEL	pmd-mask	0	N/A	0.10X	GRUPS-rs	8068.89
admixture	outbred	PEL	pmd-mask	0	N/A	0.10X	TKGWV2	6958.17
admixture	outbred	PEL	pmd-mask	0	N/A	0.10X	READv2	7899.91
contamination	outbred	CEU	pmd-mask	0.01	AFR	0.10X	correctKin	8179.84
contamination	outbred	CEU	pmd-mask	0.01	AFR	0.10X	GRUPS-rs	8247.84
contamination	outbred	CEU	pmd-mask	0.01	AFR	0.10X	TKGWV2	7112.78
contamination	outbred	CEU	pmd-mask	0.01	AFR	0.10X	READv2	8073.14
contamination	outbred	CEU	pmd-mask	0.02	AFR	0.10X	correctKin	8268.35
contamination	outbred	CEU	pmd-mask	0.02	AFR	0.10X	GRUPS-rs	8333.58
contamination	outbred	CEU	pmd-mask	0.02	AFR	0.10X	TKGWV2	7184.25
contamination	outbred	CEU	pmd-mask	0.02	AFR	0.10X	READv2	8158.16
contamination	outbred	CEU	pmd-mask	0.03	AFR	0.10X	correctKin	8356.31
contamination	outbred	CEU	pmd-mask	0.03	AFR	0.10X	GRUPS-rs	8423.41
contamination	outbred	CEU	pmd-mask	0.03	AFR	0.10X	TKGWV2	7264.45
contamination	outbred	CEU	pmd-mask	0.03	AFR	0.10X	READv2	8245.97
contamination	outbred	CEU	pmd-mask	0.04	AFR	0.10X	correctKin	8447.33
contamination	outbred	CEU	pmd-mask	0.04	AFR	0.10X	GRUPS-rs	8514.45
contamination	outbred	CEU	pmd-mask	0.04	AFR	0.10X	TKGWV2	7341.48
contamination	outbred	CEU	pmd-mask	0.04	AFR	0.10X	READv2	8334.27
contamination	outbred	CEU	pmd-mask	0.05	AFR	0.10X	correctKin	8537.87
contamination	outbred	CEU	pmd-mask	0.05	AFR	0.10X	GRUPS-rs	8606.67
contamination	outbred	CEU	pmd-mask	0.05	AFR	0.10X	TKGWV2	7423.33
contamination	outbred	CEU	pmd-mask	0.05	AFR	0.10X	READv2	8424.88
contamination	outbred	CEU	pmd-mask	0.1	AFR	0.10X	correctKin	9049.96
contamination	outbred	CEU	pmd-mask	0.1	AFR	0.10X	GRUPS-rs	9123.69
contamination	outbred	CEU	pmd-mask	0.1	AFR	0.10X	TKGWV2	7865.84
contamination	outbred	CEU	pmd-mask	0.1	AFR	0.10X	READv2	8929.18
contamination	outbred	CEU	pmd-mask	0	GBR	0.10X	correctKin	7949.42
contamination	outbred	CEU	pmd-mask	0	GBR	0.10X	GRUPS-rs	8008.13
contamination	outbred	CEU	pmd-mask	0	GBR	0.10X	TKGWV2	6907.33
contamination	outbred	CEU	pmd-mask	0	GBR	0.10X	READv2	7841.27
contamination	outbred	CEU	pmd-mask	0.01	GBR	0.10X	correctKin	8265.22
contamination	outbred	CEU	pmd-mask	0.01	GBR	0.10X	GRUPS-rs	8330.28
contamination	outbred	CEU	pmd-mask	0.01	GBR	0.10X	TKGWV2	7182.98
contamination	outbred	CEU	pmd-mask	0.01	GBR	0.10X	READv2	8155.19
contamination	outbred	CEU	pmd-mask	0.02	GBR	0.10X	correctKin	8422.13
contamination	outbred	CEU	pmd-mask	0.02	GBR	0.10X	GRUPS-rs	8489.16
contamination	outbred	CEU	pmd-mask	0.02	GBR	0.10X	TKGWV2	7320.55
contamination	outbred	CEU	pmd-mask	0.02	GBR	0.10X	READv2	8309.48
contamination	outbred	CEU	pmd-mask	0.03	GBR	0.10X	correctKin	8617.91
contamination	outbred	CEU	pmd-mask	0.03	GBR	0.10X	GRUPS-rs	8688.11
contamination	outbred	CEU	pmd-mask	0.03	GBR	0.10X	TKGWV2	7490.79
contamination	outbred	CEU	pmd-mask	0.03	GBR	0.10X	READv2	8505.9
contamination	outbred	CEU	pmd-mask	0.04	GBR	0.10X	correctKin	8769.15
contamination	outbred	CEU	pmd-mask	0.04	GBR	0.10X	GRUPS-rs	8841.42
contamination	outbred	CEU	pmd-mask	0.04	GBR	0.10X	TKGWV2	7622.92
contamination	outbred	CEU	pmd-mask	0.04	GBR	0.10X	READv2	8654.11
contamination	outbred	CEU	pmd-mask	0.05	GBR	0.10X	correctKin	8948.26
contamination	outbred	CEU	pmd-mask	0.05	GBR	0.10X	GRUPS-rs	9025.83
contamination	outbred	CEU	pmd-mask	0.05	GBR	0.10X	TKGWV2	7779.58
contamination	outbred	CEU	pmd-mask	0.05	GBR	0.10X	READv2	8833.96
contamination	outbred	CEU	pmd-mask	0.1	GBR	0.10X	correctKin	10009.6
contamination	outbred	CEU	pmd-mask	0.1	GBR	0.10X	GRUPS-rs	10101.5
contamination	outbred	CEU	pmd-mask	0.1	GBR	0.10X	TKGWV2	8703.74
contamination	outbred	CEU	pmd-mask	0.1	GBR	0.10X	READv2	9882.92
inbreeding	inbred	CEU	pmd-mask	0	N/A	0.10X	correctKin	7969.6
inbreeding	inbred	CEU	pmd-mask	0	N/A	0.10X	GRUPS-rs	8035.46
inbreeding	inbred	CEU	pmd-mask	0	N/A	0.10X	TKGWV2	6928.92
inbreeding	inbred	CEU	pmd-mask	0	N/A	0.10X	READv2	7868.66

## Sheet: S5
# Supplementary Table S5: Comparing the sensitivity of outbred relationships vs. non-intermediate relationships involving inbred individuals.
# method: Name of the considered method
# r.coefficient: Label of the considered relatedness coeffficient
# oubred.tp: Number of comparisons correctly classified by the considered method during the outbred simulation condition
# oubred.n: Total number of comparisons evaluated by the considered method during the outbred simulation condition
# outbred.sensitivity: Sensitivity (i.e outbred.tp / outbred.n) for the considered degree and method, during the outbred simulation condition
# outbred.sensitivity.sd: Standard deviation of outbred.sensitivity (i.e. outbred.sensitivity * (1-outbred.sensitivity) / outbred.n)
# inbred.tp: Number of comparisons correctly classified by the considered method during the inbred simulation condition
# inbred.n: Total number of comparisons evaluated by the considered method during the inbred simulation condition
# inbred.sensitivity: Sensitivity (i.e inbred.tp / inbred.n) for the considered degree and method, during the inbred simulation condition
# inbred.pvv.sd: Standard deviation of the inbred.sensitivity (i.e. inbred.sensitivity * (1-inbred.sensitivity) / inbred.n)
# prop.test.chi: chi-square statistic result for a two-sided test of equal proportion between outbred.sensitivity and inbred.sensitivity
# prop.test.pval: p-value result for a two-sided test of equal proportion between outbred.sensitivity and inbred.sensitivity
method	r.coefficient	outbred.tp	outbred.n	outbred.sensitivity	outbred.sensitivity.sd	inbred.tp	inbred.n	inbred.sensitivity	inbred.sensitivity.sd	prop.test.chisq	prop.test.pval
correctKin	0.125	212	300	0.7067	0.026	73	100	0.73	0.044	0.101704	0.749795
correctKin	0.25	275	300	0.9167	0.016	84	100	0.84	0.037	3.99484	0.0456399
correctKin	0.5	298	300	0.9933	0.005	100	100	1	0	1.57772e-30	1
GRUPS	0.125	245	300	0.8167	0.022	90	100	0.9	0.03	3.23919	0.0718962
GRUPS	0.25	247	300	0.8233	0.022	73	100	0.73	0.044	3.52083	0.060602
GRUPS	0.5	297	300	0.99	0.006	99	100	0.99	0.01	3.15544e-30	1
TKGWV2	0.125	0	300	0	0	0	100	0	0	N/A	N/A
TKGWV2	0.25	297	300	0.99	0.006	100	100	1	0	0.111951	0.737934
TKGWV2	0.5	298	300	0.9933	0.005	98	100	0.98	0.014	0.3367	0.56174
KIN	0.125	93	300	0.31	0.027	61	100	0.61	0.049	27.2551	1.78301e-07
KIN	0.25	187	300	0.6233	0.028	81	100	0.81	0.039	10.9905	0.0009158
KIN	0.5	284	300	0.9467	0.013	76	100	0.76	0.043	27	2.03456e-07
READv2	0.125	0	300	0	0	0	100	0	0	N/A	N/A
READv2	0.25	181	300	0.6033	0.028	55	100	0.55	0.05	0.67521	0.411241
READv2	0.5	294	300	0.98	0.008	97	100	0.97	0.017	0.0378896	0.845665
